# Supplementary material for: Hsp70–Bag3 Interactions Regulate Cancer-Related Signaling Networks
Source: Oxford University Press journal article supplement (doi:10.1158/0008-5472.can-14-0747), 2014-07-04
Supplement: 00085472can140747-sup-128418_1_supp_2463388_n5890p.xlsx [file 00085472can140747-sup-128418_1_supp_2463388_n5890p.xlsx]

## Sheet: Sheet1
ProbeID	ProbeID.Gene Accession	ProbeID.Gene Symbol	ProbeID.Gene Description	ProbeID.Cytoband	CTRL-1	CTRL-2	shHSP70-1	shHSP70-2	shHSP7 fold change	shHSP70 P value
7896740	NM_001005240	OR4F17	olfactory receptor, family 4, subfamily F, member 17	19p13.3	1.7247	2.24643	1.85574	1.7242	-1.11	0.588359
7896742	NM_207366	2011-09-14	septin 14	7p11.2	5.11277	5.25255	4.86509	4.87778	-1.06	0.138127
7896744	NM_001005277	OR4F16	olfactory receptor, family 4, subfamily F, member 16	1p36.33	3.59464	3.75522	3.04965	3.03494	-1.21	0.078199
7896754	AK290103	LOC100287934	similar to hCG2042721	1p36.33	4.36431	4.42627	3.99862	3.83943	-1.12	0.073297
7896756	BC037297	FAM87A	family with sequence similarity 87, member A	8p23.3	3.36669	3.39579	3.27052	3.17268	-1.05	0.16623
7896759	AK096570	LOC643837	hypothetical LOC643837	1p36.33	5.84635	5.44484	5.41619	5.5881	-1.03	0.604965
7896761	NM_152486	SAMD11	sterile alpha motif domain containing 11	1p36.33	5.60248	5.37266	5.48341	5.62629	1.01	0.676549
7896779	NM_198317	KLHL17	kelch-like 17 (Drosophila)	1p36.33	6.1374	6.07654	6.00334	6.01288	-1.02	0.182853
7896798	NM_032129	PLEKHN1	pleckstrin homology domain containing, family N member 1	1p36.33	5.78159	5.76988	6.03202	6.02042	1.04	0.001081
7896817	NM_005101	ISG15	ISG15 ubiquitin-like modifier	1p36.33	5.25595	5.21969	5.52071	5.44121	1.05	0.063935
7896822	NM_198576	AGRN	agrin	1p36.33	6.55034	6.46614	6.21973	6.52419	-1.02	0.530829
7896859	NR_029639	MIR200B	microRNA 200b	1p36.33	4.08192	4.35359	4.31908	4.12782	1	0.976089
7896861	NR_029834	MIR200A	microRNA 200a	1p36.33	2.50919	2.51124	2.404	2.12542	-1.11	0.328539
7896863	NR_029957	MIR429	microRNA 429	1p36.33	4.47674	4.47789	4.05422	4.20348	-1.08	0.134297
7896865	NM_153254	TTLL10	tubulin tyrosine ligase-like family, member 10	1p36.33	5.49088	5.51848	5.4774	5.41692	-1.01	0.276042
7896878	NM_080605	B3GALT6	UDP-Gal:betaGal beta 1,3-galactosyltransferase polypeptide 6	1p36.33	5.86847	5.74938	5.95339	5.85862	1.02	0.335624
7896882	NM_001130413	SCNN1D	sodium channel, nonvoltage-gated 1, delta	1p36.3-p36.2	4.66239	4.60408	4.52878	4.73033	-1	0.97703
7896908	NM_153339	PUSL1	pseudouridylate synthase-like 1	1p36.33	6.13888	6.1996	6.44742	6.49183	1.05	0.019635
7896917	NM_001029885	GLTPD1	glycolipid transfer protein domain containing 1	1p36.33	5.78984	5.81586	6.17843	6.10678	1.06	0.043183
7896921	NM_152228	TAS1R3	taste receptor, type 1, member 3	1p36.33	5.16149	5.25398	5.26177	5.15606	1	0.9882
7896929	NM_022834	VWA1	von Willebrand factor A domain containing 1	1p36.33	6.59453	6.76491	6.92023	6.71158	1.02	0.422006
7896937	NM_001039211	ATAD3C	ATPase family, AAA domain containing 3C	1p36.33	5.40322	5.26828	5.28965	5.45965	1.01	0.755854
7896952	NM_018188	ATAD3A	ATPase family, AAA domain containing 3A	1p36.33	7.04763	7.05559	6.9401	6.82369	-1.02	0.208924
7896961	NM_031921	ATAD3B	ATPase family, AAA domain containing 3B	1p36.33	7.07125	6.9548	7.1534	7.23077	1.03	0.142826
7896983	ENST00000366221	LOC100288313	similar to hCG1820414	1p36.33	4.32325	4.25092	4.54989	4.60824	1.07	0.027135
7896985	NM_080875	MIB2	mindbomb homolog 2 (Drosophila)	1p36.33	6.23452	6.14901	6.10187	6.16493	-1.01	0.394888
7897006	NM_006983	MMP23B	matrix metallopeptidase 23B	1p36.3	6.01524	5.99316	5.88849	5.88761	-1.02	0.05996
7897026	NM_138705	CALML6	calmodulin-like 6	1p36.33	4.69372	4.49487	4.43227	4.52015	-1.03	0.43159
7897034	NM_000815	GABRD	gamma-aminobutyric acid (GABA) A receptor, delta	1p|1p36.3	5.70598	5.71536	5.55364	5.51435	-1.03	0.058077
7897044	NM_002744	PRKCZ	protein kinase C, zeta	1p36.33-p36.2	6.84942	6.63199	6.48102	6.69426	-1.02	0.420687
7897066	NR_024445	LOC100128003	hypothetical protein LOC100128003	1p36.33	4.72602	4.63915	4.56344	4.70119	-1.01	0.609859
7897068	NM_003036	SKI	v-ski sarcoma viral oncogene homolog (avian)	1q22-q24	7.01906	6.89915	6.91815	7.07512	1.01	0.742731
7897078	NM_007033	RER1	RER1 retention in endoplasmic reticulum 1 homolog (S. cerevisiae)	1pter-q24	8.10695	8.02825	8.13095	8.08859	1.01	0.46963
7897089	NM_014638	PLCH2	phospholipase C, eta 2	1p36.32	5.39548	5.26912	5.22332	5.26319	-1.02	0.378822
7897119	AF425266	C1orf93	chromosome 1 open reading frame 93	1p36.32	6.99378	6.98837	7.26307	6.99091	1.02	0.500349
7897128	NM_080431	ACTRT2	actin-related protein T2	1p36.32	4.15465	4.43775	4.44031	4.45439	1.04	0.478833
7897132	NM_022114	PRDM16	PR domain containing 16	1p36.23-p33	5.63532	5.54766	5.56944	5.70688	1.01	0.633511
7897154	NM_014448	ARHGEF16	Rho guanine nucleotide exchange factor (GEF) 16	1p36.3	5.90981	5.45139	5.45423	5.63505	-1.02	0.660652
7897172	NM_182752	TPRG1L	tumor protein p63 regulated 1-like	1p36.32	7.16477	7.22416	7.36778	7.40364	1.03	0.047436
7897179	NM_001126240	TP73	tumor protein p73	1p36.3	6.00145	6.02082	6.07024	5.99711	1	0.647691
7897196	NM_152492	CCDC27	coiled-coil domain containing 27	1p36.32	4.1765	4.18579	4.30297	4.32041	1.03	0.014793
7897210	NM_004402	DFFB	DNA fragmentation factor, 40kDa, beta polypeptide (caspase-activated DNase)	1p36.3	5.57772	5.6963	5.3919	5.3113	-1.05	0.070768
7897227	NM_018836	AJAP1	adherens junctions associated protein 1	1p36.32	2.72669	3.16475	2.75919	2.6252	-1.09	0.44419
7897236	NM_003636	KCNAB2	potassium voltage-gated channel, shaker-related subfamily, beta member 2	1p36.3	5.82225	5.85006	5.7595	5.79388	-1.01	0.120171
7897257	NM_207396	RNF207	ring finger protein 207	1p36.31	5.56979	5.46483	5.65478	5.70364	1.03	0.155904
7897263	NM_207396	RNF207	ring finger protein 207	1p36.31	5.67004	5.79919	5.79285	5.51163	-1.01	0.666433
7897277	BC030279	C1orf211	chromosome 1 open reading frame 211	1p36.31	3.84607	3.99945	4.24406	3.98457	1.05	0.355867
7897280	NM_001024598	HES3	hairy and enhancer of split 3 (Drosophila)	1p36.31	5.21497	5.42209	5.40545	5.40013	1.02	0.565136
7897286	AY358179	LOC100130071	GSQS6193	1p36.31	4.98688	5.13194	5.23411	5.13027	1.02	0.314143
7897288	NM_031475	ESPN	espin	1p36.31-p36.11	7.70041	7.83567	7.70217	7.8267	-1	0.972296
7897295	NM_138697	TAS1R1	taste receptor, type 1, member 1	1p36.23	3.79761	3.75397	3.82861	4.00707	1.04	0.346037
7897305	NM_005341	ZBTB48	zinc finger and BTB domain containing 48	1p36.3	5.06337	4.93933	4.80837	5.04497	-1.02	0.647627
7897322	NM_153812	PHF13	PHD finger protein 13	1p36.31	6.59985	6.608	6.41671	6.51237	-1.02	0.20826
7897329	NM_138350	THAP3	THAP domain containing, apoptosis associated protein 3	1p36.31	4.36403	4.34704	4.58165	4.44058	1.04	0.267103
7897339	NM_015215	CAMTA1	calmodulin binding transcription activator 1	1p36.31-p36.23	5.73601	5.59496	5.20661	5.44572	-1.06	0.163006
7897370	NM_004781	VAMP3	vesicle-associated membrane protein 3 (cellubrevin)	1p36.23	7.75203	7.88848	7.93079	7.79965	1.01	0.681589
7897378	NM_016831	PER3	period homolog 3 (Drosophila)	1p36.23	4.98138	4.75089	4.83952	4.77643	-1.01	0.70293
7897404	NM_007262	PARK7	Parkinson disease (autosomal recessive, early onset) 7	1p36.23	10.1222	10.0712	10.338	10.3727	1.03	0.020075
7897416	NM_001080397	SLC45A1	solute carrier family 45, member 1	1p36.1-p36.2	6.22997	5.99786	5.66716	5.83271	-1.06	0.138176
7897426	NM_001215	CA6	carbonic anhydrase VI	1p36.2	3.45664	3.42784	3.37058	3.3627	-1.02	0.100592
7897441	NM_004285	H6PD	hexose-6-phosphate dehydrogenase (glucose 1-dehydrogenase)	1p36	5.98249	5.6951	5.51193	5.65228	-1.05	0.29324
7897449	NM_025106	SPSB1	splA/ryanodine receptor domain and SOCS box containing 1	1p36.22	6.17459	6.24643	6.07417	6.05295	-1.02	0.129774
7897460	NM_032315	SLC25A33	solute carrier family 25, member 33	1p36.22	6.49239	6.3271	6.57227	6.64836	1.03	0.209494
7897469	NM_001130924	TMEM201	transmembrane protein 201	1p36.22	5.7114	5.816	5.96604	5.76892	1.02	0.475725
7897482	NM_005026	PIK3CD	phosphoinositide-3-kinase, catalytic, delta polypeptide	1p36.2	5.98914	5.48841	5.51715	5.91665	-1	0.952034
7897509	NM_022787	NMNAT1	nicotinamide nucleotide adenylyltransferase 1	1p32-p35	3.77124	3.93468	4.15939	3.71562	1.02	0.771095
7897522	NM_052960	RBP7	retinol binding protein 7, cellular	1p36.22	5.74405	5.79381	6.19322	6.10528	1.07	0.031748
7897527	NM_001105562	UBE4B	ubiquitination factor E4B (UFD2 homolog, yeast)	1p36.3	7.00014	7.12123	7.52885	7.41429	1.06	0.03901
7897561	NM_015074	KIF1B	kinesin family member 1B	1p36.2	7.11144	6.93487	6.68792	6.89626	-1.03	0.236003
7897620	NM_002631	PGD	phosphogluconate dehydrogenase	1p36.3-p36.13	9.4469	9.55351	9.82939	9.72368	1.03	0.066523
7897632	NM_198544	APITD1	apoptosis-inducing, TAF9-like domain 1	1p36.22	4.45723	4.56349	4.45045	4.3925	-1.02	0.312623
7897648	NM_004565	PEX14	peroxisomal biogenesis factor 14	1p36.22	7.00929	6.9166	7.16979	7.18796	1.03	0.12371
7897663	NM_007375	TARDBP	TAR DNA binding protein	1p36.22	8.361	8.56549	8.62737	8.49272	1.01	0.522914
7897675	NM_021146	ANGPTL7	angiopoietin-like 7	1p36.3-p36.2	2.02204	1.91627	2.11319	2.19087	1.09	0.118863
7897685	NM_013319	UBIAD1	UbiA prenyltransferase domain containing 1	1p36-p34.1	6.87157	6.71412	6.95993	6.94563	1.02	0.28906
7897691	NM_020780	PTCHD2	patched domain containing 2	1p36.22	5.26021	5.30159	4.74078	5.01207	-1.08	0.199205
7897714	NM_001014765	FBXO44	F-box protein 44	1p36.22	6.74256	6.86588	6.63532	6.63169	-1.03	0.220405
7897728	NM_018438	FBXO6	F-box protein 6	1p36.22	5.72418	5.74954	6.10456	6.02974	1.06	0.049568
7897737	NM_198545	C1orf187	chromosome 1 open reading frame 187	1p36.22	5.51381	5.53574	5.83675	5.83978	1.06	0.019949
7897745	NM_020350	AGTRAP	angiotensin II receptor-associated protein	1p36.22	6.92284	6.92471	7.06788	7.06802	1.02	0.0039
7897753	ENST00000376592	MTHFR	5,10-methylenetetrahydrofolate reductase (NADPH)	1p36.3	4.34109	4.43808	4.33627	4.30698	-1.02	0.381552
7897774	NM_001286	CLCN6	chloride channel 6	1p36	6.11149	6.15234	5.72871	5.82074	-1.06	0.047327
7897801	NR_002754	RNU5E	RNA, U5E small nuclear	1p36.22	9.2267	9.46037	9.1072	8.98501	-1.03	0.192534
7897803	NM_000302	PLOD1	procollagen-lysine 1, 2-oxoglutarate 5-dioxygenase 1	1p36.22	8.77277	8.69275	8.43913	8.57723	-1.03	0.135534
7897824	NM_014874	MFN2	mitofusin 2	1p36.22	7.76548	7.71714	7.92139	7.97263	1.03	0.028312
7897849	NM_021933	MIIP	migration and invasion inhibitory protein	1p36.22	6.55292	6.48498	6.359	6.3506	-1.03	0.125417
7897860	NM_001243	TNFRSF8	tumor necrosis factor receptor superfamily, member 8	1p36	5.18346	5.13301	5.21851	5.35534	1.02	0.286358
7897877	NM_001066	TNFRSF1B	tumor necrosis factor receptor superfamily, member 1B	1p36.3-p36.2	3.82813	3.95545	3.95931	3.89135	1.01	0.699692
7897890	NM_015378	VPS13D	vacuolar protein sorting 13 homolog D (S. cerevisiae)	1p36.22	6.40637	6.06519	5.94593	6.23813	-1.02	0.589034
7897953	NR_003025	SNORA59A	small nucleolar RNA, H/ACA box 59A	1p36.21	4.56657	4.59032	4.42459	4.8807	1.02	0.799781
7897955	NM_001013630	AADACL4	arylacetamide deacetylase-like 4	1p36.21	2.83243	2.83313	2.88213	2.76518	-1	0.901445
7897960	NM_001103170	AADACL3	arylacetamide deacetylase-like 3	1p36.21	2.45889	2.88057	2.6896	2.38711	-1.05	0.667421
7897966	NM_152290	C1orf158	chromosome 1 open reading frame 158	1p36.21	2.99602	3.20528	3.42158	3.20516	1.07	0.293278
7897974	NM_001080830	PRAMEF12	PRAME family member 12	1p36.21	3.05788	3.02286	3.17616	3.2167	1.05	0.029609
7897978	NM_023013	PRAMEF1	PRAME family member 1	1p36.21	1.73434	1.8994	1.78052	1.75425	-1.03	0.655762
7897987	NM_023014	PRAMEF2	PRAME family member 2	1p36.21	2.26424	2.10271	2.03766	1.91141	-1.11	0.185767
7897991	NM_001012277	PRAMEF7	PRAME family member 7	1p36.21	4.52294	4.50052	4.50206	4.48049	-1	0.319101
7897997	NM_001013692	PRAMEF3	PRAME family member 3	1p36.21	3.68867	3.91131	3.89467	3.66429	-1.01	0.909856
7898002	NM_001100631	PRAMEF22	PRAME family member 22	1p36.21	3.62771	3.96775	3.95102	3.62934	-1	0.977199
7898007	NM_001013407	PRAMEF5	PRAME family member 5	1p36.21	2.26244	2.52585	2.32843	2.2938	-1.04	0.641524
7898012	NM_001098376	PRAMEF15	PRAME family member 15	1p36.21	2.39448	2.51383	2.27855	2.25656	-1.08	0.187259
7898020	NM_001039361 // NM_001039361 // NM_001039361	PRAMEF10 // PRAMEF10 // PRAMEF10	PRAME family member 10 // PRAME family member 10 // PRAME family member 10	1p36.21 // 1p36.21 // 1p36.21	2.97861	3.09124	2.99059	2.89067	-1.03	0.338485
7898026	NM_001045480	PRAMEF16	PRAME family member 16	1p36.21	2.779	2.94101	2.80754	2.6849	-1.04	0.386369
7898030	NM_001099852	PRAMEF20	PRAME family member 20	1p36.21	3.37615	3.0893	3.08759	3.33404	-1.01	0.918557
7898034	NM_001039361 // NM_001039361 // NM_001039361	PRAMEF10 // PRAMEF10 // PRAMEF10	PRAME family member 10 // PRAME family member 10 // PRAME family member 10	1p36.21 // 1p36.21 // 1p36.21	2.97861	3.09124	2.99059	2.89067	-1.03	0.338485
7898040	NM_001098376	PRAMEF15	PRAME family member 15	1p36.21	2.39448	2.51383	2.27855	2.25656	-1.08	0.187259
7898048	NM_001099851	PRAMEF17	PRAME family member 17	1p36.21	3.08418	3.20876	3.06771	2.97863	-1.04	0.261242
7898052	NM_001099852	PRAMEF20	PRAME family member 20	1p36.21	3.4001	3.11576	3.12906	3.37766	-1	0.982911
7898057	NM_006474	PDPN	podoplanin	1p36.21	3.03486	3.15744	3.10597	2.98764	-1.02	0.621011
7898070	NM_012231	PRDM2	PR domain containing 2, with ZNF domain	1p36.21	4.88584	4.74806	4.91565	5.10996	1.04	0.255061
7898084	NM_015209	KAZ	kazrin	1p36.21	5.58243	5.52642	5.62116	5.5255	1	0.772139
7898102	NM_201628	KAZ	kazrin	1p36.21	4.02312	4.1848	3.92025	3.91384	-1.05	0.259422
7898115	NM_001136218	TMEM51	transmembrane protein 51	1p36.21	6.3053	6.24284	6.1977	6.28394	-1.01	0.601434
7898124	NM_052929	FHAD1	forkhead-associated (FHA) phosphopeptide binding domain 1	1p36.21	4.06119	4.0588	3.88264	3.91935	-1.04	0.072095
7898161	NM_024329	EFHD2	EF-hand domain family, member D2	1p36.21	7.4509	7.6071	7.7392	7.59052	1.02	0.335029
7898167	NM_007272	CTRC	chymotrypsin C (caldecrin)	1p36.21	3.54105	3.52177	3.77695	3.73913	1.06	0.022011
7898176	NM_033440	CELA2A	chymotrypsin-like elastase family, member 2A	1p36.21	4.09273	4.20589	4.07481	4.32692	1.01	0.758105
7898184	NM_015849	CELA2B	chymotrypsin-like elastase family, member 2B	1p36.21	4.07801	4.34951	4.08493	3.99782	-1.04	0.41262
7898192	NM_015291	DNAJC16	DnaJ (Hsp40) homolog, subfamily C, member 16	1p36.1	6.73969	6.71903	6.61889	6.61417	-1.02	0.047676
7898211	NM_032341	DDI2	DNA-damage inducible 1 homolog 2 (S. cerevisiae)	1p36.21	6.12636	6.21951	6.4334	6.19487	1.02	0.433623
7898227	NM_015164	PLEKHM2	pleckstrin homology domain containing, family M (with RUN domain) member 2	1p36.21	7.48619	7.25493	7.47576	7.69529	1.03	0.310255
7898249	NM_207348	SLC25A34	solute carrier family 25, member 34	1p36.21	4.70676	4.80275	4.69835	4.5899	-1.02	0.267935
7898256	NM_001013641	TMEM82	transmembrane protein 82	1p36.21	4.49824	4.4646	4.47963	4.38721	-1.01	0.479174
7898263	NM_017556	FBLIM1	filamin binding LIM protein 1	1p36.21	4.26946	4.26489	4.38281	4.29888	1.02	0.328927
7898278	NM_015001	SPEN	spen homolog, transcriptional regulator (Drosophila)	1p36.33-p36.11	7.57474	7.55466	7.35685	7.47905	-1.02	0.243845
7898296	NM_178840	C1orf64	chromosome 1 open reading frame 64	1p36.13	3.70979	3.99252	3.85864	3.66187	-1.02	0.655846
7898300	NM_004070	CLCNKA	chloride channel Ka	1p36	4.03353	3.98921	4.14878	4.19712	1.04	0.039388
7898314	NM_000085	CLCNKB	chloride channel Kb	1p36	4.37152	4.18936	4.39497	4.5385	1.04	0.25601
7898328	NM_001114600	C1orf144	chromosome 1 open reading frame 144	1p36.13	9.00817	8.80222	8.73474	9.03501	-1	0.922451
7898337	NM_018090	NECAP2	NECAP endocytosis associated 2	1p36.13	7.88004	7.87497	8.19157	8.04385	1.03	0.189545
7898350	BC126340 // BC126340	LOC100132147 // LOC100132147	hypothetical LOC100132147 // hypothetical LOC100132147	1p36.13 // 1p36.13	3.81048	4.16521	4.02015	3.62935	-1.04	0.600068
7898353	NR_027002	LOC388692	hypothetical LOC388692	1q21.2	4.72261	5.06613	4.89108	4.28614	-1.07	0.492222
7898357	NR_027504	MST1P2	macrophage stimulating 1 (hepatocyte growth factor-like) pseudogene 2	1p36.2	5.62385	5.4673	5.38701	5.57406	-1.01	0.648596
7898375	NR_004430	RNU1-1	RNA, U1 small nuclear 1	1p36.1	10.3289	10.3935	10.0197	10.2969	-1.02	0.372363
7898377	NM_014675	CROCC	ciliary rootlet coiled-coil, rootletin	1pter-p36.11	5.09036	5.18717	5.13807	4.8255	-1.03	0.49175
7898407	BC036435	LOC100132147	hypothetical LOC100132147	1p36.13	3.64023	3.70418	3.66411	3.52247	-1.02	0.453961
7898411	NR_004430	RNU1-1	RNA, U1 small nuclear 1	1p36.1	10.3289	10.3935	10.0197	10.2969	-1.02	0.372363
7898413	NM_013358	PADI1	peptidyl arginine deiminase, type I	1p36.13	3.52543	3.5209	3.6376	3.45826	1.01	0.828506
7898431	NM_016233	PADI3	peptidyl arginine deiminase, type III	1p36.13	6.25866	5.84813	5.65717	6.03605	-1.04	0.536654
7898448	NM_012387	PADI4	peptidyl arginine deiminase, type IV	1p36.13	3.68112	3.70016	3.81478	3.77341	1.03	0.083388
7898466	NM_207421	PADI6	peptidyl arginine deiminase, type VI	1p36.13	2.82236	2.75125	2.82913	2.76411	1	0.857559
7898483	NM_018125	ARHGEF10L	Rho guanine nucleotide exchange factor (GEF) 10-like	1p36.13	5.57332	5.46408	5.73859	5.83194	1.05	0.06802
7898516	NM_030812	ACTL8	actin-like 8	1p36.2-p35	3.98927	4.42194	3.97635	3.91435	-1.07	0.438644
7898521	NM_032880	IGSF21	immunoglobin superfamily, member 21	1p36.13	4.25866	4.48888	4.41296	4.22534	-1.01	0.749557
7898533	NM_152375	KLHDC7A	kelch domain containing 7A	1p36.13	5.23419	5.40695	5.21696	5.19619	-1.02	0.410428
7898537	NM_002584	PAX7	paired box 7	1p36.13	4.64474	4.54693	4.74962	4.81671	1.04	0.101825
7898549	NM_016183	MRTO4	mRNA turnover 4 homolog (S. cerevisiae)	1p36.13	6.18996	6.31762	6.989	6.69573	1.09	0.114574
7898556	NM_001040125	PQLC2	PQ loop repeat containing 2	1p36.13	5.9341	5.76982	6.11055	6.17257	1.05	0.142263
7898568	AK096102	LOC100130193	hypothetical protein LOC100130193	1p36.13	3.25329	3.20672	2.98893	2.96062	-1.09	0.020026
7898574	NM_001032363	C1orf151	chromosome 1 open reading frame 151	1p36.13	8.00477	8.10758	8.53724	8.23431	1.04	0.249595
7898582	BC072682	RPS14P3	ribosomal protein S14 pseudogene 3	1p36.13	4.33084	4.00405	4.12217	4.43572	1.03	0.671262
7898585	NM_182744	NBL1	neuroblastoma, suppression of tumorigenicity 1	1p36.13	6.97533	6.80859	6.80509	6.98297	1	0.987975
7898594	NM_000871	HTR6	5-hydroxytryptamine (serotonin) receptor 6	1p36-p35	4.44898	4.57708	4.78389	4.68898	1.05	0.11728
7898602	NM_015207	OTUD3	OTU domain containing 3	1p36.13	6.37882	6.19133	5.95031	6.16898	-1.04	0.260818
7898609	NM_000929	PLA2G5	phospholipase A2, group V	1p36-p34	3.1834	3.66835	3.86151	3.30886	1.05	0.707649
7898616	NM_022819	PLA2G2F	phospholipase A2, group IIF	1p35	3.97905	4.02539	3.97004	4.10786	1.01	0.6893
7898623	NM_152376	UBXN10	UBX domain protein 10	1p36.12	2.59003	2.8758	2.74939	2.68909	-1.01	0.939572
7898627	NM_001039500	VWA5B1	von Willebrand factor A domain containing 5B1	1p36.12	3.98996	3.94964	3.82282	3.99583	-1.02	0.610185
7898653	NM_207334	FAM43B	family with sequence similarity 43, member B	1p36.12	6.374	6.46654	6.40624	6.33154	-1.01	0.482096
7898655	NM_001785	CDA	cytidine deaminase	1p36.2-p35	7.46012	7.33037	7.14232	7.41832	-1.02	0.555875
7898663	NM_032409	PINK1	PTEN induced putative kinase 1	1p36	6.81989	6.65146	6.31738	6.59744	-1.04	0.257141
7898677	NM_004807	HS6ST1	heparan sulfate 6-O-sulfotransferase 1	2q21	7.26277	7.3484	7.18735	7.02276	-1.03	0.203516
7898679	NM_032264	NBPF3	neuroblastoma breakpoint family, member 3	1p36.12	5.98554	5.91631	5.95937	6.03116	1.01	0.467816
7898693	NM_000478	ALPL	alkaline phosphatase, liver/bone/kidney	1p36.12	4.321	4.44121	4.38278	4.42705	1.01	0.762679
7898707	NM_001013693	LDLRAD2	low density lipoprotein receptor class A domain containing 2	1p36.12	4.89955	4.649	4.67413	4.89142	1	0.963871
7898713	NM_007352	CELA3B	chymotrypsin-like elastase family, member 3B	1p36.12	4.76305	4.78879	4.51115	4.61592	-1.05	0.137292
7898725	NM_005747	CELA3A	chymotrypsin-like elastase family, member 3A	1p36.12	4.15675	4.35091	4.25989	4.34198	1.01	0.716204
7898736	NR_023918	HSPC157	hypothetical LOC29092	1p36.12	4.52547	4.66019	4.61108	4.76465	1.02	0.451796
7898739	NM_044472	CDC42	cell division cycle 42 (GTP binding protein, 25kDa)	1p36.1	5.04027	5.10559	5.27777	5.32883	1.05	0.034976
7898750	NM_001083621	ZBTB40	zinc finger and BTB domain containing 40	1pter-q31.3	6.09107	5.97493	5.78673	5.93694	-1.03	0.221079
7898773	NM_020526	EPHA8	EPH receptor A8	1p36.12	3.98353	4.17238	4.27698	4.18551	1.04	0.323947
7898793	NM_015991	C1QA	complement component 1, q subcomponent, A chain	1p36.12	3.39935	3.49592	3.54886	3.52891	1.03	0.300149
7898799	NM_001114101	C1QC	complement component 1, q subcomponent, C chain	1p36.11	3.37224	3.21391	3.42586	3.56497	1.06	0.19692
7898805	NM_000491	C1QB	complement component 1, q subcomponent, B chain	1p36.12	3.79337	3.81451	3.72827	3.81189	-1.01	0.563854
7898809	NM_017449	EPHB2	EPH receptor B2	1p36.1-p35	6.8928	6.69514	6.81798	6.99439	1.02	0.487136
7898833	NM_001009999	KDM1A	lysine (K)-specific demethylase 1A	1p36.12	8.5386	8.58861	8.74477	8.56655	1.01	0.483131
7898858	NM_138479	C1orf213	chromosome 1 open reading frame 213	1p36.12	3.52789	3.50424	3.43638	3.58668	-1	0.961763
7898869	ENST00000374555	MDS2	myelodysplastic syndrome 2 translocation associated	1p36	4.20979	4.10781	3.94888	4.03629	-1.04	0.134646
7898875	NM_000975	RPL11	ribosomal protein L11	1p36.1-p35	9.62865	9.61234	9.51551	9.57942	-1.01	0.246594
7898881	NM_003198	TCEB3	transcription elongation factor B (SIII), polypeptide 3 (110kDa, elongin A)	1p36.1	7.31219	7.45602	6.94531	7.19006	-1.04	0.18487
7898894	NM_020362	C1orf128	chromosome 1 open reading frame 128	1p36.11	6.25848	6.19846	6.30065	6.41721	1.02	0.225979
7898902	NM_007260	LYPLA2	lysophospholipase II	1p36.12-p35.1	9.00543	9.12197	9.20029	9.08101	1.01	0.453546
7898910	NM_017761	PNRC2	proline-rich nuclear receptor coactivator 2	1p36.11	8.30376	8.37402	8.32957	8.33003	-1	0.838757
7898916	NM_198173	GRHL3	grainyhead-like 3 (Drosophila)	1p36.11	3.45325	3.63356	3.93589	3.85667	1.1	0.117826
7898939	NM_020448	NIPAL3	NIPA-like domain containing 3	1p36.12-p35.1	6.44819	6.27326	6.03411	6.3178	-1.03	0.402182
7898957	NM_013441	RCAN3	RCAN family member 3	1p35.3-p33	7.03887	7.05163	7.08769	7.12452	1.01	0.157541
7898967	NM_001010980	C1orf130	chromosome 1 open reading frame 130	1p36.11	4.44135	4.44462	4.42434	4.43358	-1	0.17247
7898975	NM_005839	SRRM1	serine/arginine repetitive matrix 1	1p36.11	8.13613	8.23156	8.19187	8.04503	-1.01	0.543888
7898988	NM_013943	CLIC4	chloride intracellular channel 4	1p36.11	8.68859	8.56598	8.25841	8.56442	-1.03	0.373764
7898998	NM_016124	RHD	Rh blood group, D antigen	1p36.11	2.20764	2.49814	2.78622	2.61234	1.15	0.205029
7899005	NM_014313	TMEM50A	transmembrane protein 50A	1p36.11	8.27698	8.29781	8.5831	8.56664	1.03	0.002723
7899016	NM_003002	SDHD	succinate dehydrogenase complex, subunit D, integral membrane protein	11q23	8.78373	8.67567	8.5652	8.77459	-1.01	0.676408
7899018	NM_018202	TMEM57	transmembrane protein 57	1p36.11|1p36.11	6.52939	6.4224	6.76456	6.76633	1.04	0.116226
7899023	NM_015627	LDLRAP1	low density lipoprotein receptor adaptor protein 1	1p36-p35	6.93329	6.87346	7.26434	7.08272	1.04	0.179625
7899029	NM_020379	MAN1C1	mannosidase, alpha, class 1C, member 1	1p35	5.20529	5.12156	5.15733	5.2544	1.01	0.577268
7899043	NM_020451	SEPN1	selenoprotein N, 1	1p36.13	8.62556	8.59142	8.26701	8.47389	-1.03	0.253712
7899057	NM_019557	FAM54B	family with sequence similarity 54, member B	1p36.11	7.23459	7.02482	6.96824	7.1746	-1.01	0.73027
7899075	NM_004455	EXTL1	exostoses (multiple)-like 1	1p36.1	3.90931	4.07304	4.20327	4.07683	1.04	0.294071
7899087	NR_026686	PDIK1L	PDLIM1 interacting kinase 1 like	1p36.11	5.50625	5.65803	5.83521	5.74359	1.04	0.17111
7899093	NM_024869	GRRP1	glycine/arginine rich protein 1	1p36.11	5.78565	5.69959	5.58772	5.75877	-1.01	0.566064
7899096	NM_015871	ZNF593	zinc finger protein 593	1p36.11	6.41774	6.24516	6.37494	6.52318	1.02	0.411931
7899101	NM_006314	CNKSR1	connector enhancer of kinase suppressor of Ras 1	1p36.11	6.61953	6.57918	6.54962	6.61787	-1	0.739326
7899124	NM_198137	CATSPER4	cation channel, sperm associated 4	1p35.3	2.71891	2.64715	2.48321	2.57876	-1.06	0.135436
7899134	NM_022778	CCDC21	coiled-coil domain containing 21	1p36.11	6.29079	6.20674	5.93906	6.11194	-1.04	0.1921
7899153	NM_031286	SH3BGRL3	SH3 domain binding glutamic acid-rich protein like 3	1p35-p34.3	8.37379	8.69793	8.30623	8.10631	-1.04	0.250043
7899160	NM_001803	CD52	CD52 molecule	1p36	4.09108	4.06375	4.08511	4.14236	1.01	0.408185
7899167	NM_024674	LIN28A	lin-28 homolog A (C. elegans)	1p36.11	4.05903	3.92802	3.93976	3.9434	-1.01	0.57312
7899173	NM_024887	DHDDS	dehydrodolichyl diphosphate synthase	1p36.11	7.56915	7.3075	7.45645	7.63058	1.01	0.580948
7899187	NM_005517	HMGN2	high-mobility group nucleosomal binding domain 2	1p36.1	8.59377	8.88701	9.19234	8.92608	1.04	0.249847
7899192	NM_002953	RPS6KA1	ribosomal protein S6 kinase, 90kDa, polypeptide 1	1p	7.53895	7.38464	7.19212	7.38602	-1.02	0.303723
7899220	NM_006015	ARID1A	AT rich interactive domain 1A (SWI-like)	1p35.3	6.96807	6.92418	7.01328	7.04883	1.01	0.100029
7899244	NM_017837	PIGV	phosphatidylinositol glycan anchor biosynthesis, class V	1p36.11	6.03639	6.19853	6.21612	6.00399	-1	0.961107
7899253	NM_032283	ZDHHC18	zinc finger, DHHC-type containing 18	1p36.11	7.12626	7.00564	7.08785	7.31136	1.02	0.430002
7899265	NM_006142	SFN	stratifin	1p36.11	9.72753	9.72555	9.74026	9.79012	1	0.364323
7899273	NM_006600	NUDC	nuclear distribution gene C homolog (A. nidulans)	1p35-p34	7.77516	7.69436	7.93723	7.91862	1.02	0.116743
7899284	NM_001013642	TRNP1	TMF1-regulated nuclear protein 1	1p36.11	6.84226	6.88321	7.26401	7.0306	1.04	0.239429
7899289	NM_015023	WDTC1	WD and tetratricopeptide repeats 1	1p36.11	6.71874	6.68787	6.15386	6.40709	-1.07	0.180744
7899310	NM_032125	TMEM222	transmembrane protein 222	1p36.11	6.58227	6.63505	6.83441	6.65675	1.02	0.351852
7899323	NM_032872	SYTL1	synaptotagmin-like 1	1p36.11	5.79462	5.63875	5.72603	5.69135	-1	0.935329
7899343	NM_005281	GPR3	G protein-coupled receptor 3	1p36.1-p35	6.47858	6.43735	6.3128	6.41929	-1.01	0.310143
7899346	NM_015933	CCDC72	coiled-coil domain containing 72	3p21.31	7.32861	7.16801	7.51464	7.57273	1.04	0.13735
7899350	NM_001143912	FAM76A	family with sequence similarity 76, member A	1p35.3	6.09986	5.98318	5.69409	5.95251	-1.04	0.312719
7899361	NM_177424	STX12	syntaxin 12	1p35-p34.1	6.97378	6.8231	7.06914	6.92567	1.01	0.442073
7899377	NM_138558	PPP1R8	protein phosphatase 1, regulatory (inhibitor) subunit 8	1p35	6.94645	7.04583	7.54834	7.1784	1.05	0.281116
7899392	NR_002997	SCARNA1	small Cajal body-specific RNA 1	1p35.3	2.79001	2.90115	3.08054	3.23789	1.11	0.095087
7899394	NM_001105556	C1orf38	chromosome 1 open reading frame 38	1p35.3	5.80528	5.90312	5.61006	5.71435	-1.03	0.115696
7899407	NM_014474	SMPDL3B	sphingomyelin phosphodiesterase, acid-like 3B	1p35.3	6.32047	6.47167	6.97842	6.81374	1.08	0.047143
7899417	NM_018053	XKR8	XK, Kell blood group complex subunit-related family, member 8	1p35.3	6.05749	6.09741	6.4073	6.1419	1.03	0.372925
7899422	NM_014280	DNAJC8	DnaJ (Hsp40) homolog, subfamily C, member 8	1p35.3	5.29995	5.60432	5.77886	5.70093	1.05	0.295564
7899424	NM_178191	ATPIF1	ATPase inhibitory factor 1	---	5.85587	5.9488	5.92073	5.79087	-1.01	0.6243
7899436	NM_031459	SESN2	sestrin 2	1p35.3	6.11736	6.18635	6.13812	6.39983	1.02	0.531144
7899448	NM_017638	MED18	mediator complex subunit 18	1p35.3	4.63792	4.61413	4.75701	4.71409	1.02	0.071993
7899455	NM_001048183	PHACTR4	phosphatase and actin regulator 4	1p35.3	7.17075	7.20583	7.24892	7.16374	1	0.748887
7899462	NM_001048194	RCC1	regulator of chromosome condensation 1	1p36.1	7.22616	7.34953	7.50506	7.30529	1.02	0.440369
7899480	NR_002907	SNORA73A	small nucleolar RNA, H/ACA box 73A	1p36.1	10.5094	10.3709	10.0042	9.95204	-1.05	0.06529
7899486	NR_003109	TRNAU1AP	tRNA selenocysteine 1 associated protein 1	1p35.3	5.96156	6.07743	6.37241	6.27151	1.05	0.060684
7899499	NM_152304	RAB42	RAB42, member RAS oncogene family	1p35.3	2.27917	2.44076	2.14971	2.1788	-1.09	0.240502
7899502	NR_004407	RNU11	RNA, U11 small nuclear	1p35	4.36383	4.33137	4.18899	4.34862	-1.02	0.500499
7899504	NM_006582	GMEB1	glucocorticoid modulatory element binding protein 1	1p35.3	5.81217	5.80757	5.59603	5.5845	-1.04	0.006478
7899519	NM_016258	YTHDF2	YTH domain family, member 2	1p35	7.06775	7.20848	7.20075	7.0327	-1	0.863796
7899528	NM_000911	OPRD1	opioid receptor, delta 1	1p36.1-p34.3	4.47257	4.60562	4.6827	4.5081	1.01	0.662102
7899534	NM_001166005	EPB41	erythrocyte membrane protein band 4.1 (elliptocytosis 1, RH-linked)	1p33-p32	6.65929	6.37039	6.31054	6.47752	-1.02	0.559982
7899562	NM_133178	PTPRU	protein tyrosine phosphatase, receptor type, U	1p35.3-p35.1	7.84611	7.57871	7.31615	7.76181	-1.02	0.586076
7899595	NM_002379	MATN1	matrilin 1, cartilage matrix protein	1p35	4.09896	3.98412	4.09052	4.12104	1.02	0.457137
7899602	NR_002762	PRO0611	PRO0611 protein	1p35.2	2.10343	2.22523	2.52847	2.44288	1.15	0.060064
7899604	NM_016505	ZCCHC17	zinc finger, CCHC domain containing 17	1p35.2	6.32624	6.2114	6.26796	6.35036	1.01	0.630835
7899615	NM_178865	SERINC2	serine incorporator 2	1p35.1	9.48746	9.63502	10.0183	9.94007	1.04	0.063699
7899627	NM_022164	TINAGL1	tubulointerstitial nephritis antigen-like 1	1p35.2	8.41215	8.06166	8.0688	8.28712	-1.01	0.806616
7899643	NM_001525	HCRTR1	hypocretin (orexin) receptor 1	1p33	4.13609	4.18745	4.00314	4.10966	-1.03	0.262798
7899654	NM_006559	KHDRBS1	KH domain containing, RNA binding, signal transduction associated 1	1p32	7.92693	7.75653	7.71799	7.72646	-1.02	0.393859
7899675	NM_018056	TMEM39B	transmembrane protein 39B	1p35.1	5.43323	5.37838	5.35674	5.38053	-1.01	0.385982
7899688	NM_012316	KPNA6	karyopherin alpha 6 (importin alpha 7)	1p35.1-p34.3	8.23687	8.02958	7.94266	8.20247	-1.01	0.751597
7899703	NM_175852	TXLNA	taxilin alpha	1p35.1	6.61104	6.62464	6.35223	6.40502	-1.04	0.055855
7899719	NM_024296	CCDC28B	coiled-coil domain containing 28B	1p35.1	3.7475	3.73101	3.83578	3.79085	1.02	0.155346
7899727	NM_001160042	IQCC	IQ motif containing C	1p36.11-p34.2	4.44529	4.48865	4.84948	4.77978	1.08	0.02273
7899737	NM_003757	EIF3I	eukaryotic translation initiation factor 3, subunit I	1p34.1	9.00651	8.93546	9.15782	9.26773	1.03	0.083291
7899750	NM_032648	FAM167B	family with sequence similarity 167, member B	1p35.1	4.65056	4.41822	4.37666	4.60901	-1.01	0.823947
7899753	NM_005356	LCK	lymphocyte-specific protein tyrosine kinase	1p34.3	4.24806	4.16658	4.52999	4.46614	1.07	0.034228
7899774	NM_004964	HDAC1	histone deacetylase 1	1p34	9.47509	9.58249	9.7649	9.61152	1.02	0.245003
7899790	NM_052841	TSSK3	testis-specific serine kinase 3	1p35-p34	4.71443	4.75691	4.50326	4.52761	-1.05	0.023569
7899797	NM_001145720	ZBTB8B	zinc finger and BTB domain containing 8B	1p35.1	5.16883	5.223	5.06466	5.09654	-1.02	0.091191
7899813	NM_005610	RBBP4	retinoblastoma binding protein 4	1p35.1	9.48814	9.34914	9.41296	9.50141	1	0.692979
7899821	NM_020888	KIAA1522	KIAA1522	1p35.1	6.49785	6.38392	6.38399	6.28656	-1.02	0.296943
7899829	NM_022753	S100PBP	S100P binding protein	1p35.1	6.66572	6.65006	6.64176	6.44245	-1.02	0.451559
7899841	NM_002143	HPCA	hippocalcin	1p35-p34.2	5.10802	4.91615	4.65689	4.85016	-1.05	0.198
7899851	NM_052998	ADC	arginine decarboxylase	1p33-p34.3	5.36523	5.35619	5.22029	5.29757	-1.02	0.227026
7899870	NM_152493	ZNF362	zinc finger protein 362	1p35.1	6.23968	6.37396	6.2415	6.13414	-1.02	0.305967
7899884	NM_145238	ZSCAN20	zinc finger and SCAN domain containing 20	1p34.3	5.51168	5.07997	5.07819	5.40677	-1.01	0.863403
7899898	NM_145205	HMGB4	high-mobility group box 4	1p35.1	1.70518	1.96644	2.0895	1.86671	1.08	0.496224
7899905	NM_145205	HMGB4	high-mobility group box 4	1p35.1	2.58208	3.11348	3.16861	2.68444	1.03	0.847074
7899911	NM_001134734	C1orf94	chromosome 1 open reading frame 94	1p34.3	3.38007	3.45601	3.29188	3.30031	-1.04	0.188433
7899921	NM_005268	GJB5	gap junction protein, beta 5, 31.1kDa	1p35.1	4.55598	4.76701	4.64231	4.58025	-1.01	0.718171
7899927	NM_153212	GJB4	gap junction protein, beta 4, 30.3kDa	1p34.3	4.13341	4.15244	4.00061	3.88978	-1.05	0.165276
7899932	NM_024009	GJB3	gap junction protein, beta 3, 31kDa	1p34	4.73923	4.65998	4.74097	4.78051	1.01	0.340344
7899939	NM_002060	GJA4	gap junction protein, alpha 4, 37kDa	1p35.1	4.61676	4.68493	4.78708	4.80089	1.03	0.137115
7899943	NM_024772	ZMYM1	zinc finger, MYM-type 1	1p34.3	6.23402	6.05272	5.92311	6.04036	-1.03	0.292504
7899957	NM_005095	ZMYM4	zinc finger, MYM-type 4	1p32-p34	7.51746	7.7777	7.90051	7.57795	1.01	0.703209
7899990	NM_014284	NCDN	neurochondrin	1p34.3	6.19698	6.32774	6.84647	6.66991	1.08	0.053096
7900001	NM_178548	TFAP2E	transcription factor AP-2 epsilon (activating enhancer binding protein 2 epsilon)	1p34.3	6.29877	6.31588	6.17274	6.16912	-1.02	0.032488
7900009	NM_017629	EIF2C4	eukaryotic translation initiation factor 2C, 4	1p34.3	5.9188	6.0192	5.75317	5.56151	-1.06	0.139951
7900030	NM_012199	EIF2C1	eukaryotic translation initiation factor 2C, 1	1p35-p34	7.4752	7.29963	7.0638	7.2531	-1.03	0.21883
7900051	NM_024852	EIF2C3	eukaryotic translation initiation factor 2C, 3	1p34.3	6.52969	6.33491	6.27744	6.54513	-1	0.911538
7900076	NM_014466	TEKT2	tektin 2 (testicular)	1p35.3-p34.1	4.03337	4.20692	4.22804	4.13002	1.01	0.627961
7900087	NM_017825	ADPRHL2	ADP-ribosylhydrolase like 2	1p34.3	5.66081	5.57438	5.68403	5.60976	1.01	0.65929
7900095	NM_018067	MAP7D1	MAP7 domain containing 1	1p34.3	7.38903	7.26693	7.48906	7.53644	1.03	0.168765
7900119	NM_005119	THRAP3	thyroid hormone receptor associated protein 3	1p34.3	7.38532	7.45065	7.6341	7.3981	1.01	0.555029
7900129	NM_024676	C1orf113	chromosome 1 open reading frame 113	1p34.3	5.10969	4.90082	4.82491	5.18123	-1	0.992717
7900146	NM_025079	ZC3H12A	zinc finger CCCH-type containing 12A	1p34.3	5.54919	5.59758	5.68344	5.78283	1.03	0.14573
7900157	NM_001030	RPS27	ribosomal protein S27	1q21	9.79658	9.72727	9.39629	9.49129	-1.03	0.039306
7900159	NM_003462	DNALI1	dynein, axonemal, light intermediate chain 1	1p35.1	4.05357	4.10066	4.06829	4.10962	1	0.742362
7900167	NM_018101	CDCA8	cell division cycle associated 8	1p34.3	6.23765	6.37214	6.49484	6.21498	1.01	0.787907
7900183	NM_001031740	MANEAL	mannosidase, endo-alpha-like	1p34.3	5.03723	5.30845	5.98061	5.64557	1.12	0.102109
7900192	NM_198446	C1orf122	chromosome 1 open reading frame 122	1p34.3	6.18514	6.21525	6.3247	6.20463	1.01	0.471289
7900201	NM_016037	UTP11L	UTP11-like, U3 small nucleolar ribonucleoprotein, (yeast)	1p34.3	7.56118	7.64044	7.87746	7.67389	1.02	0.311485
7900216	NM_024595	AKIRIN1	akirin 1	1p34.3	8.87945	8.71751	8.64429	8.76617	-1.01	0.460922
7900228	NM_004552	NDUFS5	NADH dehydrogenase (ubiquinone) Fe-S protein 5, 15kDa (NADH-coenzyme Q reductase)	1p34.2-p33	9.77087	9.87059	10.0754	9.96632	1.02	0.114528
7900235	NM_012090	MACF1	microtubule-actin crosslinking factor 1	1p32-p31	7.06398	6.91155	7.05138	7.05424	1.01	0.550189
7900340	NM_181809	BMP8A	bone morphogenetic protein 8a	1p34.3	6.55864	6.38561	5.5409	5.84054	-1.14	0.06789
7900352	NM_022120	OXCT2	3-oxoacid CoA transferase 2	1p34	5.18472	5.08605	5.15067	5.32547	1.02	0.437368
7900354	NM_006112	PPIE	peptidylprolyl isomerase E (cyclophilin E)	1p32	6.25514	6.26812	6.50408	6.41489	1.03	0.134874
7900365	NM_001136493	MFSD2A	major facilitator superfamily domain containing 2A	1p34.2	5.52075	5.5395	5.72096	5.745	1.04	0.006981
7900382	NM_006367	CAP1	CAP, adenylate cyclase-associated protein 1 (yeast)	1p34.2	9.75884	9.68642	9.8723	9.79696	1.01	0.165499
7900395	NM_012421	RLF	rearranged L-myc fusion	1p32	7.40831	7.44748	7.26869	7.33164	-1.02	0.095771
7900409	NM_001008740	TMCO2	transmembrane and coiled-coil domains 2	1p34.2	2.17197	2.33676	2.17477	2.16187	-1.04	0.485512
7900413	NM_005857	ZMPSTE24	zinc metallopeptidase (STE24 homolog, S. cerevisiae)	1p34	7.62132	8.08787	9.04824	8.5868	1.12	0.099148
7900426	NM_022733	SMAP2	small ArfGAP2	1p35.3-p34.1	7.45373	7.28133	7.37584	7.43421	1.01	0.740769
7900438	NM_023070	ZNF643	zinc finger protein 643	1p34.2	3.60173	3.69602	3.83057	3.64366	1.02	0.513613
7900446	NM_198494	ZNF642	zinc finger protein 642	1p34.2	2.52265	2.45969	2.43959	2.55956	1	0.915686
7900454	NM_022774	DEM1	defects in morphology 1 homolog (S. cerevisiae)	1p34.2	3.02254	3.24183	2.94547	2.96265	-1.06	0.349955
7900461	NM_152373	ZNF684	zinc finger protein 684	1p34.2	3.31183	3.43134	3.33427	3.3511	-1.01	0.713247
7900468	NM_001142588	NFYC	nuclear transcription factor Y, gamma	1p32|1p32	7.00127	6.97247	7.51894	7.27735	1.06	0.177573
7900488	NR_029846	MIR30E	microRNA 30e	1p34.2	2.67219	3.02636	3.30244	2.82514	1.08	0.550791
7900490	NR_029833	MIR30C1	microRNA 30c-1	1p34.2	2.34877	1.99566	2.1975	2.38583	1.05	0.626882
7900492	NM_004700	KCNQ4	potassium voltage-gated channel, KQT-like subfamily, member 4	1p34	4.92742	4.80531	4.7802	4.92992	-1	0.917914
7900510	NM_001905	CTPS	CTP synthase	1p34.1	6.936	6.8514	7.32789	7.23039	1.06	0.02818
7900531	NM_007102	GUCA2B	guanylate cyclase activator 2B (uroguanylin)	1p34-p33	5.10828	5.09846	5.06483	5.1349	-1	0.936715
7900540	NM_173642	RIMKLA	ribosomal modification protein rimK-like family member A	1p34.2	6.30665	6.25813	6.29166	6.36383	1.01	0.419486
7900546	NM_024664	PPCS	phosphopantothenoylcysteine synthetase	1p34.2	6.90182	6.88744	7.0952	6.75871	1	0.879175
7900555	NM_001080850	CCDC30	coiled-coil domain containing 30	1p34.2	2.8965	2.68045	2.93019	3.06093	1.07	0.268282
7900576	NM_006347	PPIH	peptidylprolyl isomerase H (cyclophilin H)	1p34.1	7.32895	7.5176	7.80869	7.41226	1.03	0.512623
7900585	NM_004559	YBX1	Y box binding protein 1	1p34	10.1246	10.3276	10.4747	10.3237	1.02	0.313868
7900597	BC001508	C1orf50	chromosome 1 open reading frame 50	1p34.2	5.60494	5.59255	5.56812	5.55945	-1.01	0.053765
7900603	AK299874	C1orf50	chromosome 1 open reading frame 50	1p34.2	5.10463	4.66204	3.96316	4.40013	-1.17	0.152692
7900609	NM_001017922	ERMAP	erythroblast membrane-associated protein (Scianna blood group)	1p34.2	4.40902	4.20058	4.49127	4.55815	1.05	0.25958
7900624	NM_015911	ZNF691	zinc finger protein 691	1p34.2	5.05133	5.20876	5.44569	5.21171	1.04	0.310232
7900635	NM_001101376	FAM183A	family with sequence similarity 183, member A	1p34.2	3.98432	4.04938	4.05104	4.10515	1.02	0.288564
7900639	NR_030778	WDR65	WD repeat domain 65	1p34.2	3.66676	3.69909	3.74479	3.62711	1	0.967623
7900654	NM_144626	TMEM125	transmembrane protein 125	1p34.2	5.55824	5.55877	5.24096	5.35637	-1.05	0.13911
7900658	NM_005424	TIE1	tyrosine kinase with immunoglobulin-like and EGF-like domains 1	1p34-p33	3.42156	3.81658	3.65525	3.59667	1	0.977862
7900683	NM_005373	MPL	myeloproliferative leukemia virus oncogene	1p34	3.73596	3.73509	3.63633	3.56475	-1.04	0.164943
7900699	NM_001255	CDC20	cell division cycle 20 homolog (S. cerevisiae)	1p34.1	9.18311	8.9915	9.11785	9.19556	1.01	0.600025
7900710	NM_001012961	C1orf84	chromosome 1 open reading frame 84	1p34.2	5.29387	5.19502	5.20361	5.33523	1	0.792131
7900792	NM_002840	PTPRF	protein tyrosine phosphatase, receptor type, F	1p34	8.33247	7.9618	7.4993	7.97104	-1.05	0.309647
7900833	NM_014663	KDM4A	lysine (K)-specific demethylase 4A	1p34.1	7.44697	7.31215	7.11163	7.20257	-1.03	0.128398
7900857	NM_174963	ST3GAL3	ST3 beta-galactoside alpha-2,3-sialyltransferase 3	1p34.1	4.72598	4.27127	4.20797	4.62956	-1.02	0.820931
7900878	NM_057091	ARTN	artemin	1p33-p32	5.64006	5.44943	5.41527	5.54231	-1.01	0.630313
7900888	NM_014652	IPO13	importin 13	1p34.1	6.70539	6.38785	6.70845	6.79057	1.03	0.413833
7900911	NM_001384	DPH2	DPH2 homolog (S. cerevisiae)	1p34	5.79944	5.64998	5.89705	5.94194	1.03	0.210955
7900922	NM_004047	ATP6V0B	ATPase, H+ transporting, lysosomal 21kDa, V0 subunit b	1p32.3	8.33929	8.30521	8.71292	8.59331	1.04	0.093542
7900931	NM_003780	B4GALT2	UDP-Gal:betaGlcNAc beta 1,4- galactosyltransferase, polypeptide 2	1p34-p33	8.52728	8.32186	8.52727	8.62221	1.02	0.359472
7900944	NM_152499	CCDC24	coiled-coil domain containing 24	1p34.1	6.06365	6.20086	6.18903	6.08826	1	0.94753
7900957	NM_173484	KLF17	Kruppel-like factor 17	1p34.1	3.84807	4.21677	4.23431	3.94641	1.01	0.828655
7900962	NM_019100	DMAP1	DNA methyltransferase 1 associated protein 1	1p34	5.5816	5.79602	6.11732	5.77561	1.05	0.34969
7900979	NM_018150	RNF220	ring finger protein 220	1p34.1	7.01367	6.98204	6.92675	7.01905	-1	0.685468
7900999	NM_001145636	C1orf228	chromosome 1 open reading frame 228	1p34.1	3.427	3.83323	3.7674	3.58533	1.01	0.861735
7901010	NM_006845	KIF2C	kinesin family member 2C	1p34.1	6.40395	6.32053	6.13547	6.29329	-1.02	0.276753
7901038	NM_001012	RPS8	ribosomal protein S8	1p34.1-p32	9.88975	9.933	9.9247	9.91794	1	0.725774
7901046	NR_000015	SNORD55	small nucleolar RNA, C/D box 55	1p34.1-p32	6.09763	6.05962	6.06487	6.01668	-1.01	0.348418
7901048	NR_000024	SNORD46	small nucleolar RNA, C/D box 46	1p34.1-p32	6.76668	7.15694	6.6724	6.56263	-1.05	0.31273
7901050	NR_001456	SNORD38A	small nucleolar RNA, C/D box 38A	1p34.1-p32	5.00835	4.96038	4.8425	4.99329	-1.01	0.535305
7901052	NR_001457	SNORD38B	small nucleolar RNA, C/D box 38B	1p34.1-p32	4.25039	3.44418	3.01243	4.02044	-1.09	0.661354
7901054	NM_004073	PLK3	polo-like kinase 3 (Drosophila)	1p34.1	7.93017	7.59085	7.28215	7.78059	-1.03	0.535681
7901073	NM_000374	UROD	uroporphyrinogen decarboxylase	1p34	6.74617	6.83988	7.24468	7.04841	1.05	0.126568
7901087	NM_032756	HPDL	4-hydroxyphenylpyruvate dioxygenase-like	1p34.1	3.78417	3.92977	3.91465	3.97718	1.02	0.421884
7901091	NM_025077	TOE1	target of EGR1, member 1 (nuclear)	---	5.45229	5.57384	6.02696	5.84772	1.08	0.072772
7901102	NM_015506	MMACHC	methylmalonic aciduria (cobalamin deficiency) cblC type, with homocystinuria	1p34.1	5.25515	5.51807	5.9497	5.40547	1.05	0.46888
7901110	NM_006066	AKR1A1	aldo-keto reductase family 1, member A1 (aldehyde reductase)	1p33-p32	8.30935	8.01876	7.67499	7.96551	-1.04	0.236226
7901123	NM_172164	NASP	nuclear autoantigenic sperm protein (histone-binding)	1p34.1	5.97201	6.36685	6.58389	6.22687	1.04	0.469688
7901135	NM_016486	TMEM69	transmembrane protein 69	1p34.1	7.34223	7.50432	7.18371	6.72362	-1.07	0.265109
7901140	NM_015112	MAST2	microtubule associated serine/threonine kinase 2	1p34.1	7.25669	7.13987	6.88686	7.04594	-1.03	0.15438
7901175	NM_005727	TSPAN1	tetraspanin 1	1p34.1	6.81644	6.91618	6.86635	6.93079	1	0.649247
7901187	NM_001013615	C1orf190	chromosome 1 open reading frame 190	1p34	4.11069	3.87854	3.88557	4.07987	-1	0.944714
7901192	NM_003579	RAD54L	RAD54-like (S. cerevisiae)	1p32	5.05381	5.07304	5.38195	5.32945	1.06	0.035095
7901212	NM_006004	UQCRH	ubiquinol-cytochrome c reductase hinge protein	1p34.1	5.77944	5.66239	5.62265	5.70532	-1.01	0.518087
7901219	NM_199044	NSUN4	NOP2/Sun domain family, member 4	1p34	6.90296	6.67527	6.72829	6.8864	1	0.908659
7901229	NM_001441	FAAH	fatty acid amide hydrolase	1p35-p34	5.39946	5.3067	5.58809	5.64627	1.05	0.056163
7901247	NM_172225	DMBX1	diencephalon/mesencephalon homeobox 1	1p33	5.27381	5.40974	5.16202	5.16061	-1.03	0.229272
7901253	BC144026	C1orf223	chromosome 1 open reading frame 223	1p33	3.00556	2.98474	3.09903	2.97437	1.01	0.624966
7901256	NM_001099772	CYP4B1	cytochrome P450, family 4, subfamily B, polypeptide 1	1p34-p12	3.34248	3.40125	3.30088	3.28401	-1.02	0.204676
7901272	NM_178033	CYP4X1	cytochrome P450, family 4, subfamily X, polypeptide 1	1p33	2.93695	3.14048	2.82003	2.73479	-1.09	0.200278
7901287	NM_178134	CYP4Z1	cytochrome P450, family 4, subfamily Z, polypeptide 1	1p33	1.70497	2.23723	1.77245	1.92545	-1.07	0.727014
7901293	NM_001010969	CYP4A22	cytochrome P450, family 4, subfamily A, polypeptide 22	1p33	3.51615	3.51062	3.52597	3.49923	-1	0.963243
7901299	NM_016308	CMPK1	cytidine monophosphate (UMP-CMP) kinase 1, cytosolic	1p32	7.38151	7.59666	7.87542	7.72816	1.04	0.154772
7901309	NM_012186	FOXE3	forkhead box E3	1p32	6.93611	6.73259	6.98827	7.20796	1.04	0.220952
7901311	NM_004474	FOXD2	forkhead box D2	1p34-p32	4.52554	4.35659	4.34144	4.46133	-1.01	0.742048
7901316	NM_001135181	SLC5A9	solute carrier family 5 (sodium/glucose cotransporter), member 9	1p33	2.66134	2.85773	2.76642	2.83996	1.02	0.736388
7901336	NM_018571	STRADB	STE20-related kinase adaptor beta	2q33.1	5.78929	5.937	6.04084	5.79184	1.01	0.755427
7901342	NM_021952	ELAVL4	ELAV (embryonic lethal, abnormal vision, Drosophila)-like 4 (Hu antigen D)	1p34	1.90824	1.85437	1.81906	1.87162	-1.02	0.44007
7901363	NM_001262	CDKN2C	cyclin-dependent kinase inhibitor 2C (p18, inhibits CDK4)	1p32	3.24616	3.42542	3.79801	3.52646	1.1	0.201912
7901376	NM_014372	RNF11	ring finger protein 11	1pter-p22.1	7.84925	7.6443	7.83732	7.84252	1.01	0.530271
7901385	NM_024586	OSBPL9	oxysterol binding protein-like 9	1p32.3	7.37523	7.33613	7.30848	7.35159	-1	0.471954
7901418	NM_152265	BTF3L4	basic transcription factor 3-like 4	1p32.3	7.36761	7.47529	7.99209	7.70228	1.06	0.176759
7901426	NM_004799	ZFYVE9	zinc finger, FYVE domain containing 9	1p32.3	5.13866	5.13333	5.61789	5.40669	1.07	0.173977
7901447	NM_032864	PRPF38A	PRP38 pre-mRNA processing factor 38 (yeast) domain containing A	1p33-p32.1	7.09656	7.15827	7.33757	7.37117	1.03	0.042279
7901460	NM_015696	GPX7	glutathione peroxidase 7	1p32	3.16124	3.20537	3.1323	3.14617	-1.01	0.274854
7901466	NM_001042693	FAM159A	family with sequence similarity 159, member A	1p32.3	2.91456	2.69978	2.53119	2.92375	-1.03	0.76416
7901479	NM_024646	ZYG11B	zyg-11 homolog B (C. elegans)	1p32.3	7.04355	6.90862	6.72452	6.89507	-1.02	0.272103
7901497	NM_001004339	ZYG11A	zyg-11 homolog A (C. elegans)	1p32.3	2.42897	2.30181	2.21184	2.41553	-1.02	0.715665
7901513	NM_002979	SCP2	sterol carrier protein 2	1p32	6.24303	6.41299	6.50377	6.47289	1.03	0.302655
7901535	NM_153703	PODN	podocan	1p32.3	4.40056	4.52552	4.24562	4.25477	-1.05	0.180122
7901549	NM_000098	CPT2	carnitine palmitoyltransferase 2	1p32	5.28164	5.38667	5.65647	5.34057	1.03	0.479226
7901557	NM_033067	DMRTB1	DMRT-like family B with proline-rich C-terminal, 1	1p32.3	4.85449	4.91236	4.91986	4.89871	1.01	0.530376
7901565	NM_000792	DIO1	deiodinase, iodothyronine, type I	1p33-p32	2.35115	2.22898	1.8688	2.36875	-1.08	0.616255
7901577	NM_052940	LRRC42	leucine rich repeat containing 42	1p33-p32.1	6.93427	6.8955	6.97959	6.964	1.01	0.173113
7901592	BC035374	C1orf83	chromosome 1 open reading frame 83	1p32.3	5.19399	5.21205	5.39778	5.35563	1.03	0.045061
7901601	NM_016491	MRPL37	mitochondrial ribosomal protein L37	1p32.1	8.488	8.61597	8.66622	8.55056	1.01	0.580833
7901611	ENST00000361350	C1orf191	chromosome 1 open reading frame 191	1p32.3	4.45647	4.25799	4.35651	4.51055	1.02	0.608671
7901613	NM_147161	ACOT11	acyl-CoA thioesterase 11	1p32.3	5.35294	5.4643	5.81557	5.80915	1.07	0.086354
7901634	NR_026782	C1orf175	chromosome 1 open reading frame 175	1p32.3	4.05259	4.01197	3.66158	3.76207	-1.09	0.065939
7901662	NM_004623	TTC4	tetratricopeptide repeat domain 4	1p32.3	6.34838	6.15628	6.61009	6.53007	1.05	0.148443
7901675	NM_152607	C1orf177	chromosome 1 open reading frame 177	1p32.3	2.63272	2.80538	3.08953	2.85422	1.09	0.236427
7901687	NM_182532	TMEM61	transmembrane protein 61	1p32.3	6.57468	6.3951	6.38931	6.44837	-1.01	0.594181
7901691	NM_057176	BSND	Bartter syndrome, infantile, with sensorineural deafness (Barttin)	1p32.1	3.30415	3.44374	3.42858	3.26457	-1.01	0.823607
7901696	NM_174936	PCSK9	proprotein convertase subtilisin/kexin type 9	1p32.3	7.30969	7.07691	6.58362	6.92054	-1.07	0.179671
7901720	NM_006252	PRKAA2	protein kinase, AMP-activated, alpha 2 catalytic subunit	1p31	6.58737	6.54159	6.5257	6.4563	-1.01	0.238153
7901732	NM_000562	C8A	complement component 8, alpha polypeptide	1p32	2.56875	2.68079	2.55372	2.55345	-1.03	0.424419
7901748	NM_001113411	FGGY	FGGY carbohydrate kinase domain containing	1p32.1	4.4984	4.36322	4.37206	4.26554	-1.03	0.328743
7901765	NM_015888	HOOK1	hook homolog 1 (Drosophila)	1p32.1	6.12977	6.0921	5.77839	5.83372	-1.05	0.017344
7901788	NM_001134673	NFIA	nuclear factor I/A	1p31.3-p31.2	5.41266	5.43232	5.46222	5.56619	1.02	0.320506
7901802	BC034822	MGC34796	SPR pseudogene	1p32	4.00382	4.04137	3.98445	4.24234	1.02	0.608675
7901804	NM_176877	INADL	InaD-like (Drosophila)	1p31.3	7.7006	7.30942	6.62738	7.05986	-1.1	0.152676
7901860	NM_001164835	L1TD1	LINE-1 type transposase domain containing 1	1p31.3	1.66682	1.69473	1.68373	1.65724	-1.01	0.646434
7901867	NM_003368	USP1	ubiquitin specific peptidase 1	1p31.3	5.88913	5.91038	6.05133	5.89513	1.01	0.51783
7901883	NM_014495	ANGPTL3	angiopoietin-like 3	1p31.1-p22.3	1.56626	1.55714	1.58013	1.6195	1.02	0.291397
7901895	NM_032852	ATG4C	ATG4 autophagy related 4 homolog C (S. cerevisiae)	1p31.3	5.52543	5.64782	5.24458	5.37681	-1.05	0.092788
7901913	NM_012183	FOXD3	forkhead box D3	1p32-p31	4.52968	4.53967	4.81715	4.77453	1.06	0.041575
7901915	NM_013339	ALG6	asparagine-linked glycosylation 6, alpha-1,3-glucosyltransferase homolog (S. cerevisiae)	1p31.3	4.39528	4.44019	4.97488	4.65534	1.09	0.23785
7901931	NM_032437	EFCAB7	EF-hand calcium binding domain 7	1p31.3	3.87745	4.02583	4.01396	3.98015	1.01	0.649679
7901948	NR_002771	DLEU2L	deleted in lymphocytic leukemia 2-like	1p31-p22	1.22332	1.17289	1.15222	1.26381	1.01	0.891793
7901951	NM_002633	PGM1	phosphoglucomutase 1	1p31	8.30238	8.26745	8.55125	8.43712	1.03	0.145139
7901969	NM_005012	ROR1	receptor tyrosine kinase-like orphan receptor 1	1p32-p31	6.00147	5.9727	6.07521	6.13199	1.02	0.103412
7901982	NM_152489	UBE2U	ubiquitin-conjugating enzyme E2U (putative)	1p31.3	1.28857	1.39471	1.43067	1.42666	1.06	0.348291
7901993	NM_020925	CACHD1	cache domain containing 1	1p31.3	6.24082	6.33523	6.25366	6.23755	-1.01	0.531873
7902023	NM_018211	RAVER2	ribonucleoprotein, PTB-binding 2	1p31.3	7.55204	7.58329	7.64337	7.59494	1.01	0.236748
7902038	NM_001005353	AK3L1	adenylate kinase 3-like 1	1p31.3	6.15149	6.06633	6.29978	6.40876	1.04	0.077165
7902043	NM_014787	DNAJC6	DnaJ (Hsp40) homolog, subfamily C, member 6	1pter-q31.3	5.21837	5.06297	5.01785	5.33677	1.01	0.861592
7902072	AB088847	BPA-1	brain peptide A1	1p31.3	2.41681	2.26314	2.05359	2.24297	-1.09	0.261684
7902074	NM_002303	LEPR	leptin receptor	1p31	5.81225	5.58172	5.70868	5.81504	1.01	0.677931
7902104	NM_002600	PDE4B	phosphodiesterase 4B, cAMP-specific (phosphodiesterase E4 dunce homolog, Drosophila)	1p31	4.68051	5.23135	5.85843	5.15069	1.11	0.352048
7902127	NM_032291	SGIP1	SH3-domain GRB2-like (endophilin) interacting protein 1	1p31.3	1.96047	2.17445	2.16927	2.1071	1.03	0.627152
7902158	NM_152665	TCTEX1D1	Tctex1 domain containing 1	1p31.3	2.67664	2.37724	2.53216	2.77319	1.05	0.58279
7902166	NM_020948	MIER1	mesoderm induction early response 1 homolog (Xenopus laevis)	1p31.3	6.57926	6.6417	6.66854	6.63311	1.01	0.402908
7902189	NM_144701	IL23R	interleukin 23 receptor	1p31.3	1.48832	1.80955	1.42936	1.13971	-1.28	0.235353
7902205	NM_001559	IL12RB2	interleukin 12 receptor, beta 2	1p31.3-p31.2	1.96853	2.14813	1.96699	1.94354	-1.05	0.45407
7902227	NM_001924	GADD45A	growth arrest and DNA-damage-inducible, alpha	1p31.2-p31.1	8.09166	7.58796	7.11334	7.85383	-1.05	0.519264
7902235	NM_020794	LRRC7	leucine rich repeat containing 7	1p31.1	2.28286	2.24025	2.26027	2.17832	-1.02	0.482752
7902267	NR_023916	PIN1L	peptidylprolyl cis/trans isomerase, NIMA-interacting 1-like (pseudogene)	1p31	5.86298	5.75654	6.10899	6.15294	1.06	0.069805
7902269	NM_004768	SFRS11	splicing factor, arginine/serine-rich 11	1p31	8.85928	8.88975	8.68991	8.71612	-1.02	0.014382
7902282	NM_001036645	HHLA3	HERV-H LTR-associating 3	1p31.1	5.59196	5.40201	5.25265	5.48226	-1.02	0.479079
7902290	NM_001902	CTH	cystathionase (cystathionine gamma-lyase)	1p31.1	6.40707	6.05615	5.50635	5.93279	-1.09	0.209523
7902308	NM_003838	FPGT	fucose-1-phosphate guanylyltransferase	1p31.1	4.28003	4.37454	4.88367	4.64695	1.1	0.131512
7902317	NM_015978	TNNI3K	TNNI3 interacting kinase	1p31.1	2.52341	2.32029	2.20001	2.21629	-1.1	0.280726
7902345	NM_138467	TYW3	tRNA-yW synthesizing protein 3 homolog (S. cerevisiae)	1p31.1	6.81365	7.02235	7.04232	6.86024	1	0.83282
7902353	NM_001001933	LHX8	LIM homeobox 8	1p31.1	2.9968	3.12969	3.16888	2.95007	-1	0.979658
7902367	NM_000016	ACADM	acyl-CoA dehydrogenase, C-4 to C-12 straight chain	1p31	7.48885	7.67399	8.23272	7.91163	1.06	0.147958
7902382	NM_004582	RABGGTB	Rab geranylgeranyltransferase, beta subunit	1p31	8.29513	8.18877	8.30804	8.33397	1.01	0.366895
7902396	NR_003042	SNORD45C	small nucleolar RNA, C/D box 45C	1p31.1	6.70522	6.26281	6.0922	6.37906	-1.04	0.459394
7902398	NR_002749	SNORD45A	small nucleolar RNA, C/D box 45A	1p31.1	8.6963	8.92984	8.88961	8.85743	1.01	0.695803
7902400	NR_002748	SNORD45B	small nucleolar RNA, C/D box 45B	1p31.1	6.08733	5.42426	5.13849	5.63178	-1.07	0.471017
7902402	NM_002440	MSH4	mutS homolog 4 (E. coli)	1p31	2.12546	2.19203	2.19844	2.29631	1.04	0.288656
7902425	NM_152996	ST6GALNAC3	ST6 (alpha-N-acetyl-neuraminyl-2,3-beta-galactosyl-1,3)-N-acetylgalactosaminide alpha-2,6-sialyltransferase 3	1p31.1	4.26502	4.04336	3.98479	4.1702	-1.02	0.650065
7902435	NM_000365	TPI1	triosephosphate isomerase 1	12p13	8.28737	8.42283	8.70862	8.5057	1.03	0.193194
7902441	NM_030965	ST6GALNAC5	ST6 (alpha-N-acetyl-neuraminyl-2,3-beta-galactosyl-1,3)-N-acetylgalactosaminide alpha-2,6-sialyltransferase 5	1p31.1	4.49201	4.41248	4.25521	4.3498	-1.03	0.139975
7902448	NM_000985	RPL17	ribosomal protein L17	18q21	10.526	10.5206	10.2687	10.3067	-1.02	0.047204
7902452	NM_174858	AK5	adenylate kinase 5	1p31	1.73987	1.65686	1.91653	1.90214	1.12	0.115157
7902476	BX537792	FAM73A	family with sequence similarity 73, member A	1p31.1	5.91747	5.97765	6.13457	5.93025	1.01	0.555183
7902495	NM_144573	NEXN	nexilin (F actin binding protein)	1p31.1	1.91855	2.06034	2.00247	1.9694	-1	0.968765
7902512	NM_007034	DNAJB4	DnaJ (Hsp40) homolog, subfamily B, member 4	1p31.1	6.06268	6.12582	6.40048	6.27977	1.04	0.10284
7902518	NM_017655	GIPC2	GIPC PDZ domain containing family, member 2	1p31.1	2.45754	2.34682	2.34553	2.46427	1	0.976305
7902527	NM_001039585	PTGFR	prostaglandin F receptor (FP)	1p31.1	1.94596	2.1118	2.28264	2.09297	1.08	0.336213
7902541	NM_006820	IFI44L	interferon-induced protein 44-like	1p31.1	1.95988	1.93086	1.98511	1.98022	1.02	0.228314
7902553	NM_006417	IFI44	interferon-induced protein 44	1p31.1	2.56506	2.42287	2.42634	2.45161	-1.02	0.579434
7902565	NM_012302	LPHN2	latrophilin 2	1p31.1	1.87243	2.01986	2.31162	1.9597	1.1	0.466002
7902592	NM_006465	ARID3B	AT rich interactive domain 3B (BRIGHT-like)	15q24	4.69454	4.76694	4.71702	4.9817	1.03	0.530498
7902594	NM_182948	PRKACB	protein kinase, cAMP-dependent, catalytic, beta	1p36.1	6.20937	6.51015	7.05864	6.56785	1.07	0.280012
7902617	NM_001010971	SAMD13	sterile alpha motif domain containing 13	1p31.1	2.95174	3.18051	3.34394	3.24235	1.07	0.264564
7902623	NM_021233	DNASE2B	deoxyribonuclease II beta	1p22.3	2.26993	2.32683	2.41817	2.19549	1	0.952192
7902634	NM_025065	RPF1	ribosome production factor 1 homolog (S. cerevisiae)	1p22.3	6.87498	7.05679	6.9459	6.80901	-1.01	0.523738
7902645	NM_001081472	SPATA1	spermatogenesis associated 1	1p22.3	1.46532	1.65143	1.46955	1.39069	-1.09	0.380671
7902660	NM_145172	WDR63	WD repeat domain 63	1p22.3	4.03431	4.31566	4.5983	4.45898	1.08	0.197777
7902687	NM_001554	CYR61	cysteine-rich, angiogenic inducer, 61	1p31-p22	6.14181	6.13648	6.01917	6.15395	-1.01	0.578043
7902702	NM_006536	CLCA2	chloride channel accessory 2	1p31-p22	1.99205	1.98871	1.99891	2.38137	1.1	0.486115
7902721	NM_001285	CLCA1	chloride channel accessory 1	1p31-p22	1.51397	1.81392	1.89728	1.64298	1.06	0.644519
7902738	NM_012128	CLCA4	chloride channel accessory 4	1p31-p22	1.90716	1.89905	1.81747	2.03086	1.01	0.875975
7902754	NR_024604	CLCA3P	chloride channel accessory 3 (pseudogene)	1p31-p22	1.98837	2.09463	2.09117	1.99683	1	0.975217
7902771	NM_016009	SH3GLB1	SH3-domain GRB2-like endophilin B1	1p22	7.43125	7.18963	7.11752	7.27867	-1.02	0.530192
7902789	NM_012262	HS2ST1	heparan sulfate 2-O-sulfotransferase 1	1p31.1-p22.1	7.93403	7.72415	7.64461	7.72816	-1.02	0.386206
7902799	NR_026985	LOC339524	hypothetical LOC339524	1p22.3	3.56355	3.73791	3.71079	3.57705	-1	0.956563
7902808	NR_026989	LOC339524	hypothetical LOC339524	1p22.3	2.95742	2.98611	2.93811	2.7112	-1.05	0.415686
7902810	NM_006769	LMO4	LIM domain only 4	1p22.3	5.83002	5.77612	5.58768	5.71025	-1.03	0.202954
7902822	NM_006256	PKN2	protein kinase N2	1p22.2	7.63759	7.43989	7.53153	7.54915	1	0.989707
7902850	NM_198460	GBP6	guanylate binding protein family, member 6	1p22.2	1.66987	1.81933	1.80251	1.79457	1.03	0.601873
7902861	NM_001134476	LRRC8B	leucine rich repeat containing 8 family, member B	1p22.2	5.89091	5.66057	5.51836	5.73445	-1.03	0.444491
7902874	NM_032270	LRRC8C	leucine rich repeat containing 8 family, member C	1p22.2	5.80986	5.86894	6.09069	6.00654	1.04	0.066349
7902883	NM_001134479	LRRC8D	leucine rich repeat containing 8 family, member D	1p22.2	6.66122	6.40272	6.73199	6.69399	1.03	0.39098
7902891	NM_182976	ZNF326	zinc finger protein 326	1p22.2	5.05988	5.12269	5.44821	5.25668	1.05	0.197734
7902913	NM_003503	CDC7	cell division cycle 7 homolog (S. cerevisiae)	1p22	5.16827	4.73389	4.77561	4.94764	-1.02	0.75475
7902930	NR_003130	HSP90B3P	heat shock protein 90kDa beta (Grp94), member 3 (pseudogene)	1p22.1	2.41954	2.32186	2.32288	2.37962	-1.01	0.770329
7902934	NM_207189	BRDT	bromodomain, testis-specific	1p22.1	2.12501	2.11592	2.13163	2.11497	1	0.800317
7902957	NM_173567	EPHX4	epoxide hydrolase 4	1p22.1	4.40859	4.83352	5.57288	5.09372	1.15	0.157938
7902965	NM_183242	BTBD8	BTB (POZ) domain containing 8	1p22.1	2.38788	2.74768	2.59809	2.27087	-1.05	0.639015
7902977	NM_015237	KIAA1107	KIAA1107	1p22.1	3.25393	3.07123	2.72937	3.0381	-1.1	0.287251
7902984	NM_001012425	C1orf146	chromosome 1 open reading frame 146	1p22.1	1.20846	1.31962	1.2946	1.26075	1.01	0.84846
7902992	NM_024813	RPAP2	RNA polymerase II associated protein 2	1p22.1	5.3676	5.30062	5.33003	5.30413	-1	0.703044
7903010	NM_000969	RPL5	ribosomal protein L5	1p22.1	6.03293	5.96957	5.92542	6.12107	1	0.861009
7903022	NR_000006	SNORD21	small nucleolar RNA, C/D box 21	1p22.1	5.05543	5.01848	4.46943	4.8187	-1.08	0.263231
7903032	NM_007358	MTF2	metal response element binding transcription factor 2	1p22.1	7.52756	7.55429	7.7468	7.61377	1.02	0.27358
7903049	NM_206886	CCDC18	coiled-coil domain containing 18	1p22.1	3.188	3.42012	3.6352	3.46812	1.07	0.2379
7903079	NM_001938	DR1	down-regulator of transcription 1, TBP-binding (negative cofactor 2)	1p22.1	8.02602	7.95767	7.80104	7.98189	-1.01	0.456078
7903092	NM_001024948	FNBP1L	formin binding protein 1-like	1p22.1	6.93406	7.13068	7.13954	6.91206	-1	0.969173
7903119	NM_002858	ABCD3	ATP-binding cassette, sub-family D (ALD), member 3	1p22-p21	7.86305	7.71278	8.01321	7.87526	1.02	0.265944
7903144	NM_001114106	SLC44A3	solute carrier family 44, member 3	1p21.3	5.49854	5.72634	6.09361	5.87051	1.07	0.14635
7903162	NM_152487	TMEM56	transmembrane protein 56	1p21.3	6.2099	5.86943	5.98162	6.34502	1.02	0.668856
7903171	NM_015485	RWDD3	RWD domain containing 3	1p21.3	4.18828	4.34049	4.23046	4.02951	-1.03	0.404868
7903188	NM_021190	PTBP2	polypyrimidine tract binding protein 2	1p22.1-p21.3	5.58975	5.35285	5.14102	5.4101	-1.04	0.390385
7903203	NM_015976	SNX7	sorting nexin 7	1p21.3	5.18915	5.28122	5.52595	5.3887	1.04	0.132271
7903214	NM_014839	LPPR4	lipid phosphate phosphatase-related protein type 4	1p21.2	4.25141	4.20598	4.16378	4.23276	-1.01	0.548092
7903227	NM_017734	PALMD	palmdelphin	1p22-p21	1.7789	1.86027	1.86355	1.90729	1.04	0.323787
7903239	NM_000028	AGL	amylo-alpha-1, 6-glucosidase, 4-alpha-glucanotransferase	1p21	6.58218	6.55943	6.74508	6.54109	1.01	0.607041
7903281	NM_012243	SLC35A3	solute carrier family 35 (UDP-N-acetylglucosamine (UDP-GlcNAc) transporter), member A3	1p21	5.73995	5.59326	5.75681	5.76075	1.02	0.427791
7903294	NM_033055	HIAT1	hippocampus abundant transcript 1	1p21.2	7.13721	7.40516	7.54089	7.43115	1.03	0.331592
7903308	NM_019083	CCDC76	coiled-coil domain containing 76	1pter-q31.3	5.12235	4.92885	5.33281	5.30396	1.06	0.196647
7903321	NM_001130841	RTCD1	RNA terminal phosphate cyclase domain 1	1p21.2	6.51501	6.91373	7.70911	7.19117	1.11	0.16144
7903334	NM_003672	CDC14A	CDC14 cell division cycle 14 homolog A (S. cerevisiae)	1p21	4.79054	4.76035	5.00802	5.14553	1.06	0.12931
7903355	NM_022049	GPR88	G protein-coupled receptor 88	1p21.3	5.68533	5.79978	5.87183	5.77737	1.01	0.387547
7903358	NM_001078	VCAM1	vascular cell adhesion molecule 1	1p32-p31	2.28013	2.40721	2.327	2.36062	1	0.998576
7903369	NM_133496	SLC30A7	solute carrier family 30 (zinc transporter), member 7	1p21.2	7.29705	7.22183	7.1538	7.19228	-1.01	0.21928
7903393	NM_001400	S1PR1	sphingosine-1-phosphate receptor 1	1p21	2.42299	2.36423	2.36922	2.38072	-1.01	0.639393
7903401	NR_033424	HEJ1	DnaJ pseudogene	1p22	1.8963	2.00946	1.92906	1.90188	-1.02	0.627056
7903404	NM_017619	RNPC3	RNA-binding region (RNP1, RRM) containing 3	1p21	5.19518	5.4565	5.30298	5.11527	-1.02	0.550121
7903407	NM_020978	AMY2B	amylase, alpha 2B (pancreatic)	1p21	3.56768	3.08788	2.96628	3.40308	-1.04	0.702581
7903414	NM_000699	AMY2A	amylase, alpha 2A (pancreatic)	1p21	4.1106	3.92113	3.26889	3.1997	-1.24	0.051156
7903425	NM_004038	AMY1A	amylase, alpha 1A (salivary)	1p21	3.83248	3.80288	3.23555	3.1099	-1.2	0.050441
7903440	NM_004038	AMY1A	amylase, alpha 1A (salivary)	1p21	3.83248	3.80288	3.23555	3.1099	-1.2	0.050441
7903457	NM_018137	PRMT6	protein arginine methyltransferase 6	1p13.3	3.1455	3.73679	4.36151	3.8333	1.19	0.241228
7903461	NM_001113226	NTNG1	netrin G1	1p13.3	2.47789	2.6296	2.53568	2.16302	-1.09	0.459721
7903478	NM_001143989	NBPF4	neuroblastoma breakpoint family, member 4	1p13.3	3.75069	3.82434	3.83282	3.85691	1.02	0.346383
7903490	NM_001143987	NBPF6	neuroblastoma breakpoint family, member 6	1p13.3	4.02311	4.10046	3.98923	4.03696	-1.01	0.414705
7903507	NM_001010883	FAM102B	family with sequence similarity 102, member B	1p13.3	6.81673	6.51178	6.18049	6.5235	-1.05	0.308208
7903519	NM_018061	PRPF38B	PRP38 pre-mRNA processing factor 38 (yeast) domain containing B	1p13.3	6.62764	6.47403	6.22134	6.39876	-1.04	0.179204
7903530	NM_001144937	FNDC7	fibronectin type III domain containing 7	1p13.3	1.97519	2.18226	1.83562	1.8476	-1.13	0.261147
7903541	NM_007269	STXBP3	syntaxin binding protein 3	1p13.3	5.73772	5.59849	5.90804	5.77401	1.03	0.215606
7903561	AY312144	LOC642864	spermatogenesis-related protein 7	1p13.3	2.08581	2.07334	2.13312	2.22114	1.05	0.264485
7903565	NM_013296	GPSM2	G-protein signaling modulator 2 (AGS3-like, C. elegans)	1p13.3	7.70528	7.46693	6.99512	7.33305	-1.06	0.192187
7903582	NM_001035006	RPL17	ribosomal protein L17	18q21	11.0052	11.0179	10.7649	10.7747	-1.02	0.001528
7903586	NM_020141	TMEM167B	transmembrane protein 167B	1p13.3	7.65166	7.33676	6.8608	7.42104	-1.05	0.411491
7903592	NM_020775	KIAA1324	KIAA1324	1p13.3	3.50667	3.66765	3.63524	3.57002	1	0.882007
7903619	NM_006513	SARS	seryl-tRNA synthetase	1p13.3-p13.1	8.70569	8.49626	8.58875	8.78928	1.01	0.605533
7903632	NM_001408	CELSR2	cadherin, EGF LAG seven-pass G-type receptor 2 (flamingo homolog, Drosophila)	1p21	6.6873	6.64249	6.60344	6.65549	-1.01	0.41268
7903667	NM_001040709	SYPL2	synaptophysin-like 2	1p13.3	4.53062	4.60086	4.52445	4.48694	-1.01	0.305703
7903676	NM_153340	ATXN7L2	ataxin 7-like 2	1p13.3	5.02218	4.98373	5.06576	5.14422	1.02	0.190141
7903688	NM_182580	CYB561D1	cytochrome b-561 domain containing 1	1p13.3	4.98861	5.01074	5.1883	5.31361	1.05	0.146457
7903694	NM_031936	GPR61	G protein-coupled receptor 61	1p13.3	4.40394	4.546	4.27335	4.28452	-1.05	0.21947
7903703	NM_006496	GNAI3	guanine nucleotide binding protein (G protein), alpha inhibiting activity polypeptide 3	1p13	7.7626	7.73743	7.87104	7.92436	1.02	0.071405
7903717	NR_029583	MIR197	microRNA 197	1p13.3	5.45749	5.91133	5.43178	4.77941	-1.11	0.296427
7903719	NM_004037	AMPD2	adenosine monophosphate deaminase 2	1p13.3	6.97093	6.66421	6.68698	6.96875	1	0.965078
7903742	NM_000850	GSTM4	glutathione S-transferase mu 4	1p13.3	6.6901	6.58397	6.4776	6.68318	-1.01	0.686437
7903753	NM_000848	GSTM2	glutathione S-transferase mu 2 (muscle)	1p13.3	4.99009	4.77653	4.42577	4.68945	-1.07	0.200323
7903765	NM_000561	GSTM1	glutathione S-transferase mu 1	1p13.3	4.80338	4.48154	4.58314	4.82912	1.01	0.784808
7903777	NM_000851	GSTM5	glutathione S-transferase mu 5	1p13.3	2.56035	2.71056	2.564	2.49144	-1.04	0.365417
7903786	NM_000757	CSF1	colony stimulating factor 1 (macrophage)	1p21-p13	4.96871	5.11804	5.14889	4.82582	-1.01	0.793195
7903803	NM_006621	AHCYL1	adenosylhomocysteinase-like 1	1p13.2	9.0227	8.60673	8.0004	8.59166	-1.06	0.300811
7903827	NM_033088	FAM40A	family with sequence similarity 40, member A	1p13.3	6.32798	6.30277	6.4845	6.39549	1.02	0.197704
7903851	NM_203412	UBL4B	ubiquitin-like 4B	1p13.3	3.47167	3.39687	3.19346	3.20531	-1.07	0.093731
7903854	NM_001010898	SLC6A17	solute carrier family 6, member 17	1p13.3	6.41757	6.40968	6.59503	6.66949	1.03	0.104193
7903867	NM_004978	KCNC4	potassium voltage-gated channel, Shaw-related subfamily, member 4	1p21	6.1511	6.10512	6.37994	6.42049	1.04	0.01306
7903878	NM_022768	RBM15	RNA binding motif protein 15	1p13	6.76527	6.62926	6.28975	6.58109	-1.04	0.292437
7903884	NM_032414	PROK1	prokineticin 1	1p21	3.94947	3.91063	4.08538	4.17689	1.05	0.103299
7903893	NM_000560	CD53	CD53 molecule	1p13	2.77458	2.92539	2.77897	2.91799	-1	0.989649
7903908	NM_006090	CEPT1	choline/ethanolamine phosphotransferase 1	1p13.3	6.9522	7.07561	6.92106	6.84764	-1.02	0.240717
7903920	NM_001025199	CHI3L2	chitinase 3-like 2	1p13.3	2.54443	2.71436	2.91301	2.54983	1.04	0.678695
7903935	NR_003928	LOC149620	CHIA-like pseudogene	1p13.2	1.73733	2.06253	2.14283	1.94745	1.08	0.538763
7903945	NM_201653	CHIA	chitinase, acidic	1p13.1-p21.3	2.58413	2.68685	2.56854	2.50647	-1.04	0.269821
7903959	NM_181643	C1orf88	chromosome 1 open reading frame 88	1p13.2	3.82527	3.62578	3.63806	3.63274	-1.02	0.532175
7903972	NM_001688	ATP5F1	ATP synthase, H+ transporting, mitochondrial F0 complex, subunit B1	1p13.2	5.92326	5.83207	6.45483	6.45231	1.1	0.050139
7903980	NM_174896	C1orf162	chromosome 1 open reading frame 162	1p13.2	4.37629	3.88239	3.53405	3.95553	-1.1	0.360441
7903988	NM_001010935	RAP1A	RAP1A, member of RAS oncogene family	1p13.3	6.65516	6.42007	6.24648	6.60648	-1.02	0.663832
7904000	NM_007204	DDX20	DEAD (Asp-Glu-Ala-Asp) box polypeptide 20	1p21.1-p13.2	5.34457	5.53792	5.97012	5.70779	1.07	0.14559
7904018	NM_018704	CTTNBP2NL	CTTNBP2 N-terminal like	1p13.2	6.65658	6.57745	6.47724	6.67376	-1.01	0.749141
7904025	NM_024494	WNT2B	wingless-type MMTV integration site family, member 2B	1p13	4.54801	4.53636	4.33178	4.38043	-1.04	0.069306
7904036	NM_006135	CAPZA1	capping protein (actin filament) muscle Z-line, alpha 1	1p13.2	6.40536	6.66235	7.05639	6.80727	1.06	0.15629
7904050	NM_020963	MOV10	Mov10, Moloney leukemia virus 10, homolog (mouse)	1p13.2	7.60954	7.68934	7.98926	7.89239	1.04	0.046444
7904073	NM_001004440	FAM19A3	family with sequence similarity 19 (chemokine (C-C motif)-like), member A3	1p13.2	5.63029	5.39434	5.40939	5.57841	-1	0.911671
7904084	NR_002796	AFARP1	AKR7 family pseudogene	1p12	3.76389	3.84018	3.90728	3.7873	1.01	0.599544
7904086	NM_014813	LRIG2	leucine-rich repeats and immunoglobulin-like domains 2	1p13.1	6.23854	5.77866	5.25437	5.84402	-1.08	0.350372
7904106	NM_152900	MAGI3	membrane associated guanylate kinase, WW and PDZ domain containing 3	1p12-p11.2	6.20602	5.67237	5.58501	6.09296	-1.02	0.811166
7904131	NM_022836	DCLRE1B	DNA cross-link repair 1B (PSO2 homolog, S. cerevisiae)	1p13.2	5.2365	5.1192	5.22706	5.30758	1.02	0.349088
7904137	NM_198268	HIPK1	homeodomain interacting protein kinase 1	1p13.2	7.55577	7.47347	6.90057	7.05071	-1.08	0.043576
7904158	NM_020190	OLFML3	olfactomedin-like 3	1p13.2	3.3162	3.49515	3.75804	3.69401	1.09	0.142274
7904168	NM_003176	SYCP1	synaptonemal complex protein 1	1p13-p12	1.41209	1.5601	1.70932	1.6391	1.13	0.196955
7904203	NM_000549	TSHB	thyroid stimulating hormone, beta	1p13	1.59567	1.71496	1.65159	1.50088	-1.05	0.500988
7904211	NM_138959	VANGL1	vang-like 1 (van gogh, Drosophila)	1p11-p13.1	5.76876	5.71497	6.14689	5.86675	1.05	0.301103
7904226	NM_018420	SLC22A15	solute carrier family 22, member 15	1p13.1	4.68276	4.66435	4.75608	4.77461	1.02	0.019655
7904244	NM_152367	C1orf161	chromosome 1 open reading frame 161	1p13.1	2.2231	2.42311	2.69806	2.80997	1.19	0.091816
7904254	NM_000701	ATP1A1	ATPase, Na+/K+ transporting, alpha 1 polypeptide	1p21	10.2772	10.2636	10.1979	10.3091	-1	0.812535
7904281	ENST00000369482	C1orf137	chromosome 1 open reading frame 137	1p13.1	1.62127	1.63065	1.55358	1.58706	-1.04	0.165204
7904287	NM_001767	CD2	CD2 molecule	1p13.1	2.47299	2.52017	2.39409	2.43382	-1.03	0.11916
7904293	NM_020440	PTGFRN	prostaglandin F2 receptor negative regulator	1p13.1	7.32871	7.19246	6.64516	6.88213	-1.07	0.094252
7904303	NM_004258	CD101	CD101 molecule	1p13	3.60722	3.81941	3.83464	3.62521	1	0.921459
7904314	NM_003594	TTF2	transcription termination factor, RNA polymerase II	1p22	5.6571	5.76861	6.059	5.76668	1.04	0.384867
7904340	NM_006699	MAN1A2	mannosidase, alpha, class 1A, member 2	1p13	7.11483	7.18504	7.08071	6.89762	-1.02	0.305279
7904361	NM_017709	FAM46C	family with sequence similarity 46, member C	1p12	5.41775	5.33932	5.22206	5.48238	-1	0.874435
7904364	NM_006784	WDR3	WD repeat domain 3	1p13-p12	6.64204	6.50722	6.68026	6.62975	1.01	0.431642
7904396	NM_001005783	HAO2	hydroxyacid oxidase 2 (long chain)	1p13.3-p13.1	3.43174	3.34611	3.52713	3.32083	1.01	0.795617
7904408	NM_000198	HSD3B2	hydroxy-delta-5-steroid dehydrogenase, 3 beta- and steroid delta-isomerase 2	1p13.1	1.77444	1.93895	2.40186	1.96613	1.18	0.354412
7904414	NM_000862	HSD3B1	hydroxy-delta-5-steroid dehydrogenase, 3 beta- and steroid delta-isomerase 1	1p13.1	3.03155	2.63582	3.30306	3.60301	1.22	0.139072
7904421	NM_000862	HSD3B1	hydroxy-delta-5-steroid dehydrogenase, 3 beta- and steroid delta-isomerase 1	1p13.1	2.26027	2.2526	2.22556	2.1969	-1.02	0.176251
7904429	AF252254	LOC128102	3-beta-hydroxysteroid dehydrogenase, tissue-type heart	1p12	3.95472	3.97752	3.26072	3.02192	-1.26	0.089059
7904433	NM_006623	PHGDH	phosphoglycerate dehydrogenase	1p12	8.7927	8.62	8.32686	8.67341	-1.02	0.430921
7904452	AB096683	FAM72D	family with sequence similarity 72, member D	1q21.1	7.29398	7.12791	6.55711	6.71335	-1.09	0.037331
7904465	NR_027337	HIST2H2BA	histone cluster 2, H2ba	1p12-p11.2	8.01253	8.24893	8.30551	8.28875	1.02	0.392274
7904469	NM_015326	SRGAP2	SLIT-ROBO Rho GTPase activating protein 2	1q32.1	8.01723	7.9513	7.43887	7.71877	-1.05	0.196468
7904478	AF172850	LOC51152	melanoma antigen	---	3.42662	3.94335	3.95754	3.23536	-1.02	0.862053
7904482	NM_015326	SRGAP2	SLIT-ROBO Rho GTPase activating protein 2	1q32.1	8.83356	8.65914	8.25921	8.64634	-1.03	0.347598
7904486	AK294414	NBPF9	neuroblastoma breakpoint family, member 9	1q21.1	10.1606	9.98292	9.87609	9.97573	-1.01	0.318784
7904500	ENST00000436832	NBPF12	neuroblastoma breakpoint family, member 12	1q21.1	10.6679	10.4969	10.4198	10.5128	-1.01	0.384612
7904506	NM_001039703	NBPF10	neuroblastoma breakpoint family, member 10	1q21.1	10.3977	10.2198	10.1277	10.2294	-1.01	0.358502
7904562	NM_001039703	NBPF10	neuroblastoma breakpoint family, member 10	1q21.1	10.3814	10.1962	10.1157	10.215	-1.01	0.391023
7904574	NM_001102663	NBPF16	neuroblastoma breakpoint family, member 16	1q21.2	8.60981	8.38026	8.22542	8.40155	-1.02	0.343397
7904695	NM_004892	SEC22B	SEC22 vesicle trafficking protein homolog B (S. cerevisiae) (gene/pseudogene)	1q21.1	8.378	8.12483	8.18065	8.28915	-1	0.919829
7904702	NM_203458	NOTCH2NL	Notch homolog 2 (Drosophila) N-terminal like	1q21.2	7.07375	6.90875	6.60693	6.82579	-1.04	0.192282
7904717	NM_213653	HFE2	hemochromatosis type 2 (juvenile)	1q21.1	3.86982	3.70324	3.81304	3.91855	1.02	0.51873
7904726	NM_006472	TXNIP	thioredoxin interacting protein	1q21.1	2.71103	2.86359	2.71072	2.62699	-1.04	0.337645
7904737	NM_001039888	ANKRD34A	ankyrin repeat domain 34A	1q21.1	4.46308	4.25758	4.32449	4.34527	-1.01	0.845561
7904742	NM_153713	LIX1L	Lix1 homolog (mouse)-like	1q21.1	7.09047	7.25135	6.94711	6.92331	-1.03	0.202979
7904751	BC017770	RBM8A	RNA binding motif protein 8A	1q12	5.65467	5.37815	5.86814	5.94875	1.07	0.194098
7904755	NM_003846	PEX11B	peroxisomal biogenesis factor 11 beta	1q21.1	6.67946	6.87218	6.82644	6.6351	-1.01	0.77162
7904761	NM_003637	ITGA10	integrin, alpha 10	1q21	3.74217	3.38719	3.18342	3.37356	-1.09	0.324983
7904796	NM_144698	ANKRD35	ankyrin repeat domain 35	1q21.1	3.43107	3.24514	3.01513	3.44558	-1.03	0.708457
7904812	NM_006099	PIAS3	protein inhibitor of activated STAT, 3	1q21	7.85081	7.67465	7.42308	7.43289	-1.05	0.162837
7904830	NM_014455	RNF115	ring finger protein 115	1q21.1	6.42178	6.79601	7.03294	6.70391	1.04	0.408472
7904843	NM_002614	PDZK1	PDZ domain containing 1	1q21	2.64961	2.68949	2.48574	2.34961	-1.1	0.145386
7904853	NM_001097612	GPR89A	G protein-coupled receptor 89A	1q21.1	5.89181	5.81182	5.43286	5.6681	-1.05	0.210007
7904869	NM_001130111	FAM108A1	family with sequence similarity 108, member A1	19p13.3	6.58043	6.76376	6.34601	6.18635	-1.06	0.08121
7904874	NM_001102663	NBPF16	neuroblastoma breakpoint family, member 16	1q21.2	10.6752	10.4291	10.4429	10.5604	-1	0.758634
7904881	NR_002305	PDIA3P	protein disulfide isomerase family A, member 3 pseudogene	1q21.1	10.0699	10.0159	10.1068	10.1505	1.01	0.137732
7904883	NM_004284	CHD1L	chromodomain helicase DNA binding protein 1-like	1q12	5.89862	5.82613	6.1414	5.99521	1.04	0.171572
7904907	NM_004326	BCL9	B-cell CLL/lymphoma 9	1q21	7.23122	7.17967	7.05479	7.18126	-1.01	0.380269
7904927	NM_005267	GJA8	gap junction protein, alpha 8, 50kDa	1q21.1	3.75991	3.41909	3.53283	3.63055	-1	0.971162
7904930	NM_016334	GPR89B	G protein-coupled receptor 89B	1q21.1	6.02291	5.95656	5.70055	5.81997	-1.04	0.108617
7904948	NM_001130111	FAM108A1	family with sequence similarity 108, member A1	19p13.3	6.58043	6.76376	6.34601	6.18635	-1.06	0.08121
7904965	AB042555	PDE4DIP	phosphodiesterase 4D interacting protein	1q12	2.98723	3.12385	3.21004	3.44324	1.09	0.212217
7904969	NM_030796	VOPP1	vesicular, overexpressed in cancer, prosurvival protein 1	7p11.2	7.15966	7.37346	7.27584	7.19009	-1	0.809835
7904974	NR_003242	C1orf152	profilin 1 pseudogene	1q21	10.2116	10.2218	10.5142	10.4614	1.03	0.053803
7904976	NM_001170755	NBPF15	neuroblastoma breakpoint family, member 15	1q21.2	8.89337	8.68781	8.55395	8.69598	-1.02	0.329741
7904997	NM_178230	PPIAL4A	peptidylprolyl isomerase A (cyclophilin A)-like 4A	1q21.2	4.74206	4.81297	4.90834	4.79638	1.02	0.393605
7904999	NM_001102663	NBPF16	neuroblastoma breakpoint family, member 16	1q21.2	8.89657	8.6777	8.55079	8.70266	-1.02	0.364231
7905016	NM_178230	PPIAL4A	peptidylprolyl isomerase A (cyclophilin A)-like 4A	1q21.2	4.74206	4.81297	4.90834	4.79638	1.02	0.393605
7905018	AK095105	FLJ37786	hypothetical LOC642691	2p11.1	4.92184	5.03751	4.85302	4.73193	-1.04	0.155139
7905020	NM_000798	DRD5	dopamine receptor D5	4p16.1	4.77091	4.99041	4.85342	4.7119	-1.02	0.542522
7905025	NM_000798	DRD5	dopamine receptor D5	4p16.1	3.84014	4.19621	3.96806	3.82271	-1.03	0.615611
7905028	NM_002339	LSP1	lymphocyte-specific protein 1	11p15.5	5.27383	5.48301	5.54629	5.55405	1.03	0.347917
7905043	NR_027002	LOC388692	hypothetical LOC388692	1q21.2	4.47437	4.63889	4.99262	4.74874	1.07	0.183867
7905047	NM_000566	FCGR1A	Fc fragment of IgG, high affinity Ia, receptor (CD64)	1q21.2-q21.3	1.27634	1.54676	1.75795	1.67035	1.21	0.244169
7905051	NM_178230	PPIAL4A	peptidylprolyl isomerase A (cyclophilin A)-like 4A	1q21.2	3.11822	3.20783	3.16708	3.07391	-1.01	0.578274
7905058	NR_027002	LOC388692	hypothetical LOC388692	1q21.2	4.60732	4.60221	5.21517	4.7469	1.08	0.354327
7905060	NM_000566	FCGR1A	Fc fragment of IgG, high affinity Ia, receptor (CD64)	1q21.2-q21.3	1.78643	1.91629	2.04548	2.13685	1.13	0.107409
7905067	NM_003548	HIST2H4A	histone cluster 2, H4a	1q21	5.17522	5.56197	5.8648	5.60079	1.07	0.275771
7905079	NM_003516	HIST2H2AA3	histone cluster 2, H2aa3	1q21.2	7.88137	8.15276	8.81509	8.54994	1.08	0.072595
7905085	NM_001005464	HIST2H3A	histone cluster 2, H3a	1q21.2	7.43192	7.73794	7.96682	7.75975	1.04	0.28699
7905088	NM_003517	HIST2H2AC	histone cluster 2, H2ac	1q21-q23	7.84721	7.96816	8.17766	7.97435	1.02	0.316159
7905092	NM_016074	BOLA1	bolA homolog 1 (E. coli)	1p36.13-q31.3	6.14721	5.88723	5.56882	5.82078	-1.06	0.216969
7905099	NM_007259	VPS45	vacuolar protein sorting 45 homolog (S. cerevisiae)	1q21.2	6.86203	6.94903	7.16748	7.07361	1.03	0.078934
7905116	NM_016274	PLEKHO1	pleckstrin homology domain containing, family O member 1	1q21.2	5.00533	4.78845	4.81556	5.01127	1	0.920338
7905131	NM_012113	CA14	carbonic anhydrase XIV	1q21	2.48448	2.87003	2.68896	2.28591	-1.08	0.566448
7905147	NM_024579	C1orf54	chromosome 1 open reading frame 54	1q21.2	2.52017	2.66735	2.35573	2.28575	-1.12	0.121972
7905154	BC027999	C1orf51	chromosome 1 open reading frame 51	1q21.2	2.7059	2.82155	2.96193	2.76911	1.04	0.478389
7905163	NM_018997	MRPS21	mitochondrial ribosomal protein S21	1q21	8.12734	8.10083	7.97565	8.05154	-1.01	0.201473
7905171	NM_004698	PRPF3	PRP3 pre-mRNA processing factor 3 homolog (S. cerevisiae)	1q21.1	6.41948	6.66684	6.77594	6.67034	1.03	0.362327
7905185	NM_015203	RPRD2	regulation of nuclear pre-mRNA domain containing 2	1q21.3	6.04167	6.13432	6.38819	6.21993	1.04	0.188519
7905198	NM_025150	TARS2	threonyl-tRNA synthetase 2, mitochondrial (putative)	1q21.3	5.67264	5.45235	5.22962	5.46791	-1.04	0.319112
7905220	NM_004425	ECM1	extracellular matrix protein 1	1q21	4.44173	4.40303	4.55146	4.48536	1.02	0.158086
7905233	NM_019032	ADAMTSL4	ADAMTS-like 4	1q21.3	4.46121	4.3263	4.31782	4.5925	1.01	0.739197
7905258	NM_001145415	SETDB1	SET domain, bifurcated 1	1q21	7.01257	6.87763	6.91574	6.89468	-1.01	0.65972
7905283	NM_003568	ANXA9	annexin A9	1q21	5.16561	5.191	5.48027	5.32152	1.04	0.210729
7905299	NM_021222	PRUNE	prune homolog (Drosophila)	1q21	5.79439	5.93784	5.88446	5.62655	-1.02	0.549808
7905308	NM_001159642	BNIPL	BCL2/adenovirus E1B 19kD interacting protein like	1q21.3	3.99107	4.11221	3.78232	3.63829	-1.09	0.071312
7905324	BC002469	C1orf56	chromosome 1 open reading frame 56	1q21.3	4.76809	4.85426	4.94704	4.94838	1.03	0.194537
7905329	NM_006818	MLLT11	myeloid/lymphoid or mixed-lineage leukemia (trithorax homolog, Drosophila); translocated to, 11	1q21	4.23954	4.07857	3.96702	4.36452	1	0.979077
7905339	NM_144618	GABPB2	GA binding protein transcription factor, beta subunit 2	1q21.3	3.79927	4.40125	4.28032	3.87377	-1.01	0.955555
7905349	NM_024575	TNFAIP8L2	tumor necrosis factor, alpha-induced protein 8-like 2	1q21.3	3.64161	3.5156	3.62732	3.75061	1.03	0.337181
7905355	NM_024041	SCNM1	sodium channel modifier 1	1q21.3	6.94876	7.05416	7.16515	7.07005	1.02	0.244722
7905365	NM_001135638	PIP5K1A	phosphatidylinositol-4-phosphate 5-kinase, type I, alpha	1q22-q24	8.33539	8.26043	8.21599	8.36531	-1	0.941034
7905374	NM_002810	PSMD4	proteasome (prosome, macropain) 26S subunit, non-ATPase, 4	1q21.3	6.31587	6.41454	6.56978	6.50401	1.03	0.118714
7905382	NM_020832	ZNF687	zinc finger protein 687	1q21.3	6.26228	6.38577	6.21941	6.19844	-1.02	0.30679
7905395	NM_002796	PSMB4	proteasome (prosome, macropain) subunit, beta type, 4	1q21	9.49444	9.51357	10.0162	9.88835	1.05	0.08433
7905406	NM_020770	CGN	cingulin	1q21	5.74377	5.65576	5.42903	5.60051	-1.03	0.236164
7905428	NM_020127	TUFT1	tuftelin 1	1q21	5.92969	5.78939	5.57158	6.06466	-1.01	0.895114
7905444	NM_030918	SNX27	sorting nexin family member 27	1q21.3	7.09522	7.16221	7.05293	7.04994	-1.01	0.259791
7905464	NM_001144956	C1orf230	chromosome 1 open reading frame 230	1q21.3	3.35497	3.58392	3.2512	3.01988	-1.11	0.17664
7905474	NM_016178	OAZ3	ornithine decarboxylase antizyme 3	1q21.3	3.41274	3.39165	3.34496	3.19988	-1.04	0.31967
7905483	NM_178438	LCE5A	late cornified envelope 5A	1q21.3	3.70762	3.63646	3.54692	3.75538	-1.01	0.876043
7905486	NM_019060	CRCT1	cysteine-rich C-terminal 1	1q21	2.55561	2.77378	2.93071	2.89629	1.09	0.256413
7905490	NM_178434	LCE3C	late cornified envelope 3C	1q21.3	3.4203	3.98475	4.03421	3.87127	1.07	0.533835
7905492	NM_178433	LCE3B	late cornified envelope 3B	1q21.3	5.96946	5.93719	5.92726	6.00686	1	0.792379
7905496	AF005082	C1orf46	chromosome 1 open reading frame 46	1q21.3	2.29364	2.46934	2.14347	2.23502	-1.09	0.231787
7905500	NM_178430	LCE2D	late cornified envelope 2D	1q21.3	2.57795	2.66483	2.31638	2.53863	-1.08	0.306672
7905503	NM_178429	LCE2C	late cornified envelope 2C	1q21.3	2.29179	2.66697	2.7402	2.2956	1.02	0.907059
7905505	NM_014357	LCE2B	late cornified envelope 2B	1q21	4.33046	4.58396	4.40289	4.2464	-1.03	0.483116
7905507	NM_178428	LCE2A	late cornified envelope 2A	1q21.3	5.753	5.73155	5.70049	5.90939	1.01	0.655777
7905510	NM_178356	LCE4A	late cornified envelope 4A	1q21.3	3.9134	3.97056	3.95947	4.29672	1.05	0.465309
7905512	NM_001024679	C1orf68	chromosome 1 open reading frame 68	1q21.3	5.14428	5.09187	5.07831	5.33376	1.02	0.614945
7905515	NM_001025231	KPRP	keratinocyte proline-rich protein	1q21.3	3.46038	3.48905	3.47076	3.53489	1.01	0.537765
7905517	NM_178354	LCE1F	late cornified envelope 1F	1q21.3	5.49156	5.37243	5.47985	5.62669	1.02	0.33277
7905519	NM_178353	LCE1E	late cornified envelope 1E	1q21.3	5.39937	5.35481	5.56477	5.62468	1.04	0.033748
7905523	NM_178352	LCE1D	late cornified envelope 1D	1q21.3	6.7468	6.51435	6.31015	6.53735	-1.03	0.331144
7905525	NM_178349	LCE1B	late cornified envelope 1B	1q21.3	2.6205	2.86064	2.95865	2.7525	1.04	0.544413
7905528	NM_178348	LCE1A	late cornified envelope 1A	1q21.3	5.72488	5.4302	5.80655	6.00763	1.06	0.222442
7905530	NM_030663	SMCP	sperm mitochondria-associated cysteine-rich protein	1q21.3	2.4628	2.72686	2.53223	2.29774	-1.07	0.416861
7905533	NM_005547	IVL	involucrin	1q21	3.79585	3.67646	3.70778	3.67006	-1.01	0.570804
7905536	NM_173080	SPRR4	small proline-rich protein 4	1q21.3	4.78061	5.04787	4.89888	4.9157	-1	0.966936
7905544	NM_005987	SPRR1A	small proline-rich protein 1A	1q21-q22	3.97977	4.1517	4.11105	3.94811	-1.01	0.789052
7905548	NM_005416	SPRR3	small proline-rich protein 3	1q21-q22	2.84182	3.04912	2.91367	2.71944	-1.05	0.460227
7905553	NM_003125	SPRR1B	small proline-rich protein 1B (cornifin)	1q21-q22	2.60252	2.57682	2.69029	2.5575	1.01	0.696943
7905559	NM_001010857	LELP1	late cornified envelope-like proline-rich 1	1q21.3	4.14329	4.28936	4.21038	4.0476	-1.02	0.509135
7905563	NM_000427	LOR	loricrin	1q21	3.8541	3.83782	3.78831	4.0716	1.02	0.659163
7905571	NM_002965	S100A9	S100 calcium binding protein A9	1q21	4.00442	3.88612	3.77606	3.84985	-1.03	0.222046
7905576	NM_176823	S100A7A	S100 calcium binding protein A7A	1q21.3	2.33521	2.41262	2.39692	2.3781	1.01	0.785806
7905581	NM_006271	S100A1	S100 calcium binding protein A1	1q21	3.5109	3.78216	3.64689	3.54155	-1.01	0.76902
7905589	NM_015607	C1orf77	chromosome 1 open reading frame 77	1q21.3	6.82715	6.47056	6.37398	6.57501	-1.03	0.503911
7905598	NM_012437	SNAPIN	SNAP-associated protein	1q21.3	6.36782	6.21437	6.46097	6.54994	1.03	0.167084
7905606	NM_000906	NPR1	natriuretic peptide receptor A/guanylate cyclase A (atrionatriuretic peptide receptor A)	1q21-q22	2.82486	3.35243	3.31464	3.00937	1.02	0.836987
7905631	NM_023015	INTS3	integrator complex subunit 3	1q21.3	6.87869	6.83283	6.99382	6.91601	1.01	0.188338
7905664	NM_024330	SLC27A3	solute carrier family 27 (fatty acid transporter), member 3	1q21.3	5.08918	5.07596	5.32691	5.31218	1.05	0.001843
7905677	NM_130898	CREB3L4	cAMP responsive element binding protein 3-like 4	1q21.3	4.37802	4.46849	4.44747	4.13852	-1.03	0.550272
7905691	NM_001030	RPS27	ribosomal protein S27	1q21	9.42596	9.38125	9.0539	9.13698	-1.03	0.042209
7905700	NM_014847	UBAP2L	ubiquitin associated protein 2-like	1q21.3	8.32217	8.47561	8.92345	8.63091	1.05	0.188622
7905733	NM_006118	HAX1	HCLS1 associated protein X-1	1q21.3	7.40089	7.15428	7.40269	7.43363	1.02	0.456369
7905746	NM_080429	AQP10	aquaporin 10	1q21.3	2.55455	2.98266	3.11577	2.65741	1.04	0.743054
7905754	NM_020452	ATP8B2	ATPase, class I, type 8B, member 2	1q21.3	6.489	6.36315	6.39616	6.46154	1	0.973361
7905789	NM_000565	IL6R	interleukin 6 receptor	1q21	5.36401	5.4267	5.78691	5.65478	1.06	0.08352
7905801	NM_001098475	TDRD10	tudor domain containing 10	1q21.3	2.83381	2.70571	2.4428	2.66393	-1.08	0.262038
7905817	NM_000748	CHRNB2	cholinergic receptor, nicotinic, beta 2 (neuronal)	1q21.3	4.63983	4.77632	4.64598	4.69849	-1.01	0.694326
7905826	NR_024163	CKS1B	CDC28 protein kinase regulatory subunit 1B	1q21.2	7.22826	7.0636	7.24181	7.42534	1.03	0.268824
7905831	NM_025207	FLAD1	FAD1 flavin adenine dinucleotide synthetase homolog (S. cerevisiae)	1q21.3	5.93519	5.81211	5.87306	5.93882	1.01	0.700807
7905848	NM_018655	LENEP	lens epithelial protein	1q22	4.1404	4.08059	4.13575	3.97787	-1.01	0.61935
7905854	NM_015872	ZBTB7B	zinc finger and BTB domain containing 7B	1q21.3	6.52466	6.7814	6.9015	6.55691	1.01	0.759257
7905862	NM_152494	DCST1	DC-STAMP domain containing 1	1q22	3.96059	4.03742	3.68724	3.70781	-1.08	0.064603
7905881	NM_207196	ADAM15	ADAM metallopeptidase domain 15	1q21.3	7.6585	7.72764	7.71952	7.73082	1	0.521459
7905909	NM_005227	EFNA4	ephrin-A4	1q21-q22	5.62125	6.02974	6.61398	6.0903	1.09	0.260788
7905918	NM_004952	EFNA3	ephrin-A3	1q21-q22	7.19541	7.26274	7.23843	7.31966	1.01	0.44645
7905929	NM_004428	EFNA1	ephrin-A1	1q21-q22	5.98266	5.85594	5.88496	5.99326	1	0.834756
7905938	NM_018845	RAG1AP1	recombination activating gene 1 activating protein 1	1q22	8.22716	8.12408	7.90716	7.97815	-1.03	0.078061
7905951	NM_025058	TRIM46	tripartite motif-containing 46	1q22	4.9655	5.03236	5.18328	4.91491	1.01	0.773128
7905968	NM_002455	MTX1	metaxin 1	1q21	6.53643	6.77801	6.53975	6.34078	-1.03	0.304117
7905974	NM_020897	HCN3	hyperpolarization activated cyclic nucleotide-gated potassium channel 3	1q22	5.77485	6.01019	6.01031	5.95565	1.02	0.580702
7905986	NM_002004	FDPS	farnesyl diphosphate synthase (farnesyl pyrophosphate synthetase, dimethylallyltranstransferase, geranyltranstransferase)	1q22	6.64625	6.72759	6.88842	6.7533	1.02	0.257856
7905999	NM_001105203	RUSC1	RUN and SH3 domain containing 1	1q21-q22	6.09872	6.27589	6.33999	6.21265	1.01	0.507651
7906017	GU480875 // GU480875	POU5F1P4 // POU5F1P4	POU class 5 homeobox 1 pseudogene 4 // POU class 5 homeobox 1 pseudogene 4	1q22 // 1q22	4.05294	4.14346	4.11364	4.107	1	0.833449
7906021	NM_018116	MSTO1	misato homolog 1 (Drosophila)	1q22	6.55885	6.51056	6.40103	6.46713	-1.02	0.144589
7906041	NM_033657	DAP3	death associated protein 3	1q21-q22	7.77962	7.74603	7.98587	7.86736	1.02	0.200371
7906056	NR_024117	MSTO2P	misato homolog 2 pseudogene	1q22	6.91329	6.83027	6.68039	6.85412	-1.02	0.426867
7906061	NM_152280	SYT11	synaptotagmin XI	1q21.2	3.18859	3.33603	3.26723	3.19238	-1.01	0.743251
7906069	NM_181885	RXFP4	relaxin/insulin-like family peptide receptor 4	1q22	3.38095	3.50317	3.55739	3.4645	1.02	0.470003
7906072	NM_014017	ROBLD3	roadblock domain containing 3	1q22	4.76965	4.68965	4.8566	5.03467	1.05	0.210661
7906079	NM_020387	RAB25	RAB25, member RAS oncogene family	1q22	9.04842	8.97771	8.88685	8.95802	-1.01	0.212538
7906085	NM_170707	LMNA	lamin A/C	1q21.2-q21.3	8.13577	8.03993	8.23641	8.30287	1.02	0.103201
7906107	NM_022367	SEMA4A	sema domain, immunoglobulin domain (Ig), transmembrane domain (TM) and short cytoplasmic domain, (semaphorin) 4A	1q22	3.73326	3.7072	3.55069	3.76298	-1.02	0.656993
7906128	NM_014655	SLC25A44	solute carrier family 25, member 44	1q22	6.21003	6.21943	6.01654	6.2094	-1.02	0.482606
7906133	NM_007221	PMF1	polyamine-modulated factor 1	1q12	7.46039	7.25122	7.54119	7.68766	1.04	0.194746
7906140	NM_199173	BGLAP	bone gamma-carboxyglutamate (gla) protein	1q25-q31	5.43194	5.37257	5.41513	5.59135	1.02	0.446347
7906146	NR_026678	TMEM79	transmembrane protein 79	1q22	4.62679	4.64401	4.56355	4.56491	-1.02	0.07506
7906154	NM_144627	C1orf182	chromosome 1 open reading frame 182	1q22	2.62394	2.67455	3.0198	3.11422	1.16	0.032531
7906163	NM_020407	RHBG	Rh family, B glycoprotein (gene/pseudogene)	1q21.3	5.57108	5.58096	5.47405	5.56574	-1.01	0.434288
7906177	NM_001105669	TTC24	tetratricopeptide repeat domain 24	1q23.1	5.39885	5.36016	5.24816	5.22555	-1.03	0.0394
7906185	NM_144772	APOA1BP	apolipoprotein A-I binding protein	1q22-q21.2	9.05752	9.16273	9.39294	9.27427	1.02	0.107919
7906194	AK055377	GPATCH4	G patch domain containing 4	1q22	5.54461	5.16978	4.71438	5.16121	-1.08	0.290483
7906197	NM_021817	HAPLN2	hyaluronan and proteoglycan link protein 2	1q23.1	5.00746	5.03876	5.04055	5.08956	1.01	0.305986
7906205	NM_021948	BCAN	brevican	1q31	4.86945	5.09486	5.15307	4.82868	1	0.969205
7906223	NM_015997	C1orf66	chromosome 1 open reading frame 66	1q23.1	6.25125	5.97391	5.38056	5.75039	-1.1	0.151332
7906235	NM_005973	PRCC	papillary renal cell carcinoma (translocation-associated)	1q21.1	8.18774	8.14927	8.4153	8.31742	1.02	0.118802
7906244	NM_001007792	NTRK1	neurotrophic tyrosine kinase, receptor, type 1	1q21-q22	5.18852	5.0223	5.26129	5.31705	1.04	0.245934
7906264	NM_001080471	PEAR1	platelet endothelial aggregation receptor 1	1q23.1	5.12253	5.14992	5.00308	5.38327	1.01	0.814756
7906284	NM_144702	C1orf92	chromosome 1 open reading frame 92	1q23.1	3.96541	3.78735	3.6809	3.90121	-1.02	0.610455
7906307	NM_018240	KIRREL	kin of IRRE like (Drosophila)	1q21-q25	5.66734	5.74712	5.83395	5.80637	1.02	0.187622
7906330	NM_001766	CD1D	CD1d molecule	1q22-q23	4.47083	4.64496	4.55779	4.55475	-1	0.988103
7906339	NM_001763	CD1A	CD1a molecule	1q22-q23	3.01649	3.37003	3.08394	2.67419	-1.11	0.36762
7906348	NM_001765	CD1C	CD1c molecule	1q22-q23	2.43374	2.66436	2.53451	2.50058	-1.01	0.830499
7906355	NM_030893	CD1E	CD1e molecule	1q22-q23	4.64339	4.59111	4.28699	4.18905	-1.09	0.039906
7906365	NM_001004473	OR10K1	olfactory receptor, family 10, subfamily K, member 1	1q23.1	2.55402	2.82045	2.60811	2.48565	-1.06	0.473807
7906367	NM_001004472	OR10R2	olfactory receptor, family 10, subfamily R, member 2	1q23.1	1.43043	1.36052	1.19835	1.3358	-1.1	0.27845
7906370	AK122667	OR10R3P	olfactory receptor, family 10, subfamily R, member 3 pseudogene	1q23.1	1.68671	1.71049	1.43222	1.42815	-1.19	0.024127
7906372	NM_001004478	OR10Z1	olfactory receptor, family 10, subfamily Z, member 1	1q23.1	2.52618	2.50412	2.18359	2.52461	-1.07	0.517765
7906374	NM_001005184	OR6K6	olfactory receptor, family 6, subfamily K, member 6	1q23.1	2.50072	2.55701	2.58893	2.54217	1.01	0.424699
7906377	NM_002432	MNDA	myeloid cell nuclear differentiation antigen	1q22	1.54573	1.61624	1.76704	1.52893	1.04	0.673847
7906386	NM_152501	PYHIN1	pyrin and HIN domain family, member 1	1q23.1	2.01264	2.26953	2.12595	1.99116	-1.04	0.642287
7906400	NM_005531	IFI16	interferon, gamma-inducible protein 16	1q22	1.69133	1.65061	1.86817	1.80736	1.1	0.0575
7906417	NM_021189	CADM3	cell adhesion molecule 3	1q21.2-q22	3.87496	4.03936	3.80721	3.67833	-1.06	0.183732
7906435	NM_002036	DARC	Duffy blood group, chemokine receptor	1q21-q22	3.28374	3.10761	3.17868	3.4202	1.03	0.565076
7906443	NM_002001	FCER1A	Fc fragment of IgE, high affinity I, receptor for; alpha polypeptide	1q23	2.1525	2.08846	2.19392	2.21722	1.04	0.19896
7906452	NM_012351	OR10J1	olfactory receptor, family 10, subfamily J, member 1	1q23.2	2.27395	2.18742	1.95615	2.09284	-1.1	0.147816
7906458	NM_001639	APCS	amyloid P component, serum	1q21-q23	2.67251	2.41005	2.38358	2.52933	-1.03	0.642389
7906469	NM_017823	DUSP23	dual specificity phosphatase 23	1q23.2	7.31743	7.40973	7.37171	7.31854	-1	0.769151
7906475	NM_001004310	FCRL6	Fc receptor-like 6	1q23.2	4.03273	4.04936	4.02552	3.90037	-1.02	0.427409
7906486	NM_020125	SLAMF8	SLAM family member 8	1q23.2	3.04633	3.31132	3.41583	3.15709	1.03	0.619903
7906496	NM_004983	KCNJ9	potassium inwardly-rectifying channel, subfamily J, member 9	1q21-q23	4.3384	4.22478	4.26976	4.42661	1.02	0.568623
7906501	NM_000702	ATP1A2	ATPase, Na+/K+ transporting, alpha 2 polypeptide	1q21-q23	3.739	3.84692	4.1706	4.08866	1.09	0.043887
7906527	NM_144699	ATP1A4	ATPase, Na+/K+ transporting, alpha 4 polypeptide	1q21-q23	2.57892	2.76759	2.69872	2.68545	1.01	0.874633
7906552	NM_001231	CASQ1	calsequestrin 1 (fast-twitch, skeletal muscle)	1q21	3.1195	3.30306	3.36269	3.27608	1.03	0.434406
7906564	NM_003768	PEA15	phosphoprotein enriched in astrocytes 15	1q21.1	7.673	7.69389	7.60165	7.72057	-1	0.771597
7906574	NR_002190	SUMO1P3	SUMO1 pseudogene 3	1q22	2.48133	2.04749	2.5114	2.65312	1.14	0.365664
7906576	NM_015331	NCSTN	nicastrin	1q22-q23	6.60079	6.95213	7.29439	7.19456	1.07	0.208139
7906597	NM_005598	NHLH1	nescient helix loop helix 1	1q22	3.8594	3.93942	3.6339	3.7486	-1.06	0.110509
7906602	NM_020335	VANGL2	vang-like 2 (van gogh, Drosophila)	1q22-q23	4.29471	4.36863	3.98312	3.82278	-1.11	0.076127
7906613	NM_021181	SLAMF7	SLAM family member 7	1q23.1-q24.1	2.07843	2.20504	2.25265	2.17562	1.03	0.449608
7906622	NM_002348	LY9	lymphocyte antigen 9	1q21.3-q22	3.63152	3.68362	3.6798	3.69491	1.01	0.448988
7906642	NM_152366	KLHDC9	kelch domain containing 9	1q23.3	2.62869	2.71578	2.56993	2.51192	-1.05	0.14697
7906652	NM_005600	NIT1	nitrilase 1	1q21-q22	7.6888	7.75815	7.56127	7.4943	-1.03	0.05577
7906662	NM_016406	UFC1	ubiquitin-fold modifier conjugating enzyme 1	1q23.3	6.99033	7.38129	7.89549	7.57495	1.08	0.166685
7906671	NM_001014443	USP21	ubiquitin specific peptidase 21	1q22	6.22853	6.12798	5.76291	5.89938	-1.06	0.063018
7906688	NM_001122764	PPOX	protoporphyrinogen oxidase	1q22	4.40257	4.40759	4.03474	3.96302	-1.1	0.054978
7906703	NM_004550	NDUFS2	NADH dehydrogenase (ubiquinone) Fe-S protein 2, 49kDa (NADH-coenzyme Q reductase)	1q23	7.88715	7.86385	8.0152	7.95648	1.01	0.129347
7906720	NM_004106	FCER1G	Fc fragment of IgE, high affinity I, receptor for; gamma polypeptide	1q23	2.89581	2.86289	3.16604	3.05003	1.08	0.136729
7906728	NM_032174	TOMM40L	translocase of outer mitochondrial membrane 40 homolog (yeast)-like	1q23.3	5.36059	5.12446	5.45577	5.44143	1.04	0.330368
7906742	NM_001102566	PCP4L1	Purkinje cell protein 4 like 1	1q23.3	4.82568	5.1608	4.87329	4.70851	-1.04	0.425668
7906746	NM_003001	SDHC	succinate dehydrogenase complex, subunit C, integral membrane protein, 15kDa	1q23.3	6.0451	6.50935	5.84869	5.75514	-1.08	0.279392
7906757	NM_001136219	FCGR2A	Fc fragment of IgG, low affinity IIa, receptor (CD32)	1q23	2.00192	1.51203	1.95306	2.49342	1.27	0.330415
7906764	NM_002155	HSPA6	heat shock 70kDa protein 6 (HSP70B')	1q23	3.10798	2.99369	3.10313	3.18757	1.03	0.324353
7906767	NM_201563	FCGR2C	Fc fragment of IgG, low affinity IIc, receptor for (CD32) (gene/pseudogene)	1q23.3	4.08465	4.32835	4.16887	3.92005	-1.04	0.450371
7906775	NR_024151	HSPA7	heat shock 70kDa protein 7 (HSP70B)	1q23.3	6.95399	6.87869	6.91657	6.90886	-1	0.938909
7906777	NM_004001	FCGR2B	Fc fragment of IgG, low affinity IIb, receptor (CD32)	1q23	1.81541	2.08632	1.98396	1.82186	-1.03	0.795485
7906786	NM_032738	FCRLA	Fc receptor-like A	1q23.3	2.87587	3.05781	3.29087	3.00991	1.06	0.403048
7906797	NM_001002901	FCRLB	Fc receptor-like B	1q23.3	4.44705	4.51481	4.54294	4.50513	1.01	0.408172
7906810	NM_007240	DUSP12	dual specificity phosphatase 12	1q21-q22	5.74238	5.71574	5.56947	5.69613	-1.02	0.362405
7906819	NM_007348	ATF6	activating transcription factor 6	1q22-q23	7.58054	7.50193	7.47761	7.56933	-1	0.796942
7906838	NM_014697	NOS1AP	nitric oxide synthase 1 (neuronal) adaptor protein	1q23.3	6.18167	5.96397	5.79948	5.99749	-1.03	0.358718
7906852	NM_175866	UHMK1	U2AF homology motif (UHM) kinase 1	1q23.3	8.55506	8.46311	8.60642	8.53573	1.01	0.403201
7906863	NM_003115	UAP1	UDP-N-acteylglucosamine pyrophosphorylase 1	1q23.3	7.06624	6.90968	6.58305	6.85791	-1.04	0.263926
7906878	NM_001014796	DDR2	discoidin domain receptor tyrosine kinase 2	1q23.3	3.65252	3.40533	3.3246	3.59932	-1.02	0.752102
7906900	AY423733	DDR2	discoidin domain receptor tyrosine kinase 2	1q23.3	2.98601	2.27125	2.07807	2.62458	-1.12	0.604181
7906904	NM_016371	HSD17B7	hydroxysteroid (17-beta) dehydrogenase 7	1q23	5.17211	5.51644	5.07484	5.18872	-1.04	0.421637
7906919	NM_001102445	RGS4	regulator of G-protein signaling 4	1q23.3	3.78533	3.83089	3.43223	3.40624	-1.11	0.010812
7906930	NM_145697	NUF2	NUF2, NDC80 kinetochore complex component, homolog (S. cerevisiae)	1q23.3	6.3646	6.63524	6.79456	6.36581	1.01	0.786312
7906954	NM_002585	PBX1	pre-B-cell leukemia homeobox 1	1q23	6.43865	6.47132	6.19205	6.15847	-1.05	0.006959
7906973	NM_001005214	LRRC52	leucine rich repeat containing 52	1q24.1	2.61866	2.54719	2.59539	2.65783	1.02	0.455942
7906978	NM_004528	MGST3	microsomal glutathione S-transferase 3	1q23	8.1079	8.20742	8.45284	8.46904	1.04	0.096338
7906988	BC012108	LOC440700	carbonic anhydrase XIV (CA14) pseudogene	1q24.1	2.29463	2.34751	2.60555	2.44431	1.09	0.214423
7906995	NM_012474	UCK2	uridine-cytidine kinase 2	1q23	8.11669	8.06757	8.23688	8.11798	1.01	0.367604
7907012	NR_002925	FMO9P	flavin containing monooxygenase 9 pseudogene	1q24.1	2.42113	2.28498	2.21521	2.29705	-1.04	0.369129
7907024	NM_017542	POGK	pogo transposable element with KRAB domain	1q24.1	6.49273	6.36208	6.57769	6.59373	1.02	0.244935
7907032	NM_032858	MAEL	maelstrom homolog (Drosophila)	1q24.1	1.854	2.03814	2.0408	2.01563	1.04	0.53484
7907053	NM_001080426	DUSP27	dual specificity phosphatase 27 (putative)	1q22-q24	3.08843	3.13532	3.2887	3.23207	1.05	0.059456
7907058	NM_002697	POU2F1	POU class 2 homeobox 1	1q22-q23	6.54578	6.6777	6.23292	6.39613	-1.05	0.110508
7907079	NM_052862	RCSD1	RCSD domain containing 1	1q22-q24	4.37514	4.34787	4.34187	4.5196	1.02	0.577525
7907090	AY194294	LOC100128751	INM04	1q24.2	4.26873	4.0886	4.12139	4.11012	-1.02	0.611709
7907092	NM_003953	MPZL1	myelin protein zero-like 1	1q24.2	8.14602	8.15056	8.29618	8.37466	1.02	0.130588
7907104	NM_018442	DCAF6	DDB1 and CUL4 associated factor 6	1q24.2	6.55107	6.5718	6.86104	6.65962	1.03	0.29572
7907124	NM_152902	TIPRL	TIP41, TOR signaling pathway regulator-like (S. cerevisiae)	1q23.2	6.96784	6.98383	6.76222	6.7413	-1.03	0.004562
7907135	NM_199344	SFT2D2	SFT2 domain containing 2	1q24.2	6.91167	6.71923	6.72817	6.6985	-1.02	0.478475
7907146	NM_005149	TBX19	T-box 19	1q24.2	5.8055	5.52115	5.05226	5.51457	-1.07	0.319123
7907156	NM_002995	XCL1	chemokine (C motif) ligand 1	1q23	3.46495	3.22517	2.88195	3.31944	-1.08	0.455019
7907160	NM_001677	ATP1B1	ATPase, Na+/K+ transporting, beta 1 polypeptide	1q24	8.26416	7.91278	7.554	7.89591	-1.05	0.276413
7907171	NM_003666	BLZF1	basic leucine zipper nuclear factor 1	1q24	6.88991	6.96928	7.01442	7.05393	1.02	0.186393
7907183	NM_181093	SCYL3	SCY1-like 3 (S. cerevisiae)	1q24.2	4.15786	4.27999	4.59689	4.3468	1.06	0.255982
7907213	NM_152281	GORAB	golgin, RAB6-interacting	1q24.2	4.84395	4.72644	4.67591	4.62461	-1.03	0.225617
7907222	NM_006902	PRRX1	paired related homeobox 1	1q24	2.65112	2.58024	2.87219	2.76908	1.08	0.095991
7907232	NM_025063	C1orf129	chromosome 1 open reading frame 129	1q24.3	1.40222	1.3962	1.40175	1.16787	-1.09	0.506912
7907249	NM_006894	FMO3	flavin containing monooxygenase 3	1q23-q25	1.95561	2.16415	2.23522	2.1904	1.07	0.372958
7907260	NR_002601	FMO6P	flavin containing monooxygenase 6 pseudogene	1q24.3	2.32805	2.38557	2.49028	2.47813	1.05	0.128773
7907271	NM_001460	FMO2	flavin containing monooxygenase 2 (non-functional)	1q23-q25	2.40893	2.3974	2.42848	2.2715	-1.02	0.62072
7907286	NM_002021	FMO1	flavin containing monooxygenase 1	1q23-q25	1.53829	1.66746	1.59032	1.501	-1.04	0.550064
7907297	NM_002022	FMO4	flavin containing monooxygenase 4	1q23-q25	4.02783	4.08596	4.47175	4.08748	1.05	0.450192
7907310	NM_015172	BAT2L2	HLA-B associated transcript 2-like 2	1q23.3	8.07821	7.93841	7.93618	7.9973	-1.01	0.661244
7907353	NM_015935	METTL13	methyltransferase like 13	1q24-q25.3	6.30469	6.17448	6.60842	6.49716	1.05	0.069771
7907370	NM_015569	DNM3	dynamin 3	1q24.3	4.16184	4.28818	4.24468	4.2235	1	0.909416
7907396	NM_139240	C1orf105	chromosome 1 open reading frame 105	1q24.3	2.11107	1.93673	1.84057	1.99312	-1.06	0.454392
7907404	NM_014283	C1orf9	chromosome 1 open reading frame 9	1q24	6.00368	5.92593	5.58742	5.70119	-1.06	0.054452
7907430	NM_000639	FASLG	Fas ligand (TNF superfamily, member 6)	1q23	3.1162	3.01228	2.98009	3.15679	1	0.971812
7907439	NM_004905	PRDX6	peroxiredoxin 6	1q25.1	8.90607	9.09617	9.27961	9.07053	1.02	0.344353
7907445	NM_014458	KLHL20	kelch-like 20 (Drosophila)	1q24.1-q24.3	6.12065	5.91883	6.05509	6.07382	1.01	0.734456
7907466	NM_018122	DARS2	aspartyl-tRNA synthetase 2, mitochondrial	1q25.1	5.98683	6.30598	6.92253	6.3267	1.08	0.326495
7907486	NM_032522	ZBTB37	zinc finger and BTB domain containing 37	1q25.1	4.70649	4.68229	4.56701	4.52098	-1.03	0.052031
7907492	NM_014857	RABGAP1L	RAB GTPase activating protein 1-like	1q24	4.98745	4.78174	4.83315	4.99789	1.01	0.837175
7907531	NM_005684	GPR52	G protein-coupled receptor 52	1q24	4.0892	4.1468	3.8353	3.84366	-1.07	0.060771
7907537	NM_014412	CACYBP	calcyclin binding protein	1q24-q25	7.01451	7.18649	7.33672	7.25897	1.03	0.22434
7907549	NM_022093	TNN	tenascin N	1q23-q24	3.15788	3.33973	3.70193	3.73954	1.15	0.109421
7907572	NM_020318	PAPPA2	pappalysin 2	1q23-q25	3.19709	2.99588	3.42829	3.42691	1.11	0.187767
7907601	NM_021165	FAM5B	family with sequence similarity 5, member B	1q24.1-q25.3	2.64534	2.8621	2.96732	2.75771	1.04	0.545573
7907611	NM_170692	RASAL2	RAS protein activator like 2	1q24	5.5798	5.47686	5.45594	5.27576	-1.03	0.28783
7907633	NM_032126	C1orf49	chromosome 1 open reading frame 49	1q25.2	2.28086	2.39686	2.33312	2.19531	-1.03	0.496564
7907649	NR_033186	C1orf220	chromosome 1 open reading frame 220	1q25.2	3.30338	3.28873	3.45032	3.46913	1.05	0.006597
7907657	NM_152663	RALGPS2	Ral GEF with PH domain and SH3 binding motif 2	1q25.2	6.10077	6.1781	5.81032	5.67472	-1.07	0.05746
7907680	NM_014864	FAM20B	family with sequence similarity 20, member B	1q25	7.09587	6.89079	6.66452	6.88538	-1.03	0.284945
7907690	NM_022371	TOR3A	torsin family 3, member A	1q25.2	5.74613	5.66485	5.65531	5.66636	-1.01	0.467851
7907702	NM_003101	SOAT1	sterol O-acyltransferase 1	1q25	6.70345	6.79524	6.92697	6.85558	1.02	0.142226
7907719	NM_144696	C1orf125	chromosome 1 open reading frame 125	1q25.2	2.8293	2.99523	2.95458	2.95307	1.01	0.704357
7907749	NM_173533	TDRD5	tudor domain containing 5	1q25.2	1.93361	2.09953	2.47809	2.02767	1.12	0.475645
7907769	NM_173509	FAM163A	family with sequence similarity 163, member A	1q25.2	3.08726	3.19608	3.17656	3.01502	-1.01	0.689609
7907773	NM_015602	TOR1AIP1	torsin A interacting protein 1	1q24.2	6.55981	6.48757	6.7338	6.82236	1.04	0.050436
7907790	NM_014810	CEP350	centrosomal protein 350kDa	1p36.13-q41	5.77179	5.71053	5.83279	5.83663	1.02	0.200247
7907830	NM_002826	QSOX1	quiescin Q6 sulfhydryl oxidase 1	1q24	8.03756	7.77358	7.47722	7.91274	-1.03	0.510767
7907849	NM_033343	LHX4	LIM homeobox 4	1q25.2	4.81416	4.6896	4.59963	4.41642	-1.05	0.175573
7907861	NM_004736	XPR1	xenotropic and polytropic retrovirus receptor 1	1q25.1	7.61703	7.46453	7.38502	7.58042	-1.01	0.687923
7907882	NM_020950	KIAA1614	KIAA1614	1q25.3	4.33589	4.30469	4.03481	4.01404	-1.07	0.00697
7907893	NM_001531	MR1	major histocompatibility complex, class I-related	1q25.3	4.97711	5.04218	4.852	4.91803	-1.03	0.114998
7907904	NM_016545	IER5	immediate early response 5	1q25.3	7.35471	7.28118	7.14535	7.32335	-1.01	0.513542
7907907	AF387616	LOC100287948	gm140	1q25.3	2.53847	2.81128	2.59029	2.49835	-1.05	0.507477
7907911	NM_000721	CACNA1E	calcium channel, voltage-dependent, R type, alpha 1E subunit	1q25-q31	3.05342	3.14829	2.89168	2.8441	-1.08	0.081072
7907972	BC140780	C1orf120	chromosome 1 open reading frame 120	1q25.3	2.15669	2.24304	2.18756	2.13997	-1.02	0.558257
7907977	NM_001137669	RGSL1	regulator of G-protein signaling like 1	1q25	1.88725	1.96384	2.02978	1.89291	1.02	0.703219
7907986	NM_001137669	RGSL1	regulator of G-protein signaling like 1	1q25	1.7688	1.91305	1.94917	1.77975	1.01	0.852459
7908003	NM_030769	NPL	N-acetylneuraminate pyruvate lyase (dihydrodipicolinate synthase)	1q25	2.26788	2.33097	2.51234	2.22433	1.03	0.716102
7908022	NR_033302	DHX9	DEAH (Asp-Glu-Ala-His) box polypeptide 9	1q25	6.86746	7.27375	7.86022	7.39426	1.08	0.215869
7908041	NM_002293	LAMC1	laminin, gamma 1 (formerly LAMB2)	1q31	7.36628	7.12712	7.59816	7.80525	1.06	0.104993
7908072	NM_005562	LAMC2	laminin, gamma 2	1q25-q31	6.49686	6.33877	6.45558	6.72716	1.03	0.407403
7908097	NM_173156	SMG7	Smg-7 homolog, nonsense mediated mRNA decay factor (C. elegans)	1q25	6.93977	6.92776	7.21334	7.2059	1.04	0.001816
7908125	NM_015149	RGL1	ral guanine nucleotide dissociation stimulator-like 1	1q25.3	5.34564	5.26598	5.58415	5.56051	1.05	0.074055
7908147	NM_052965	TSEN15	tRNA splicing endonuclease 15 homolog (S. cerevisiae)	1q25	6.783	6.68779	6.79539	6.8148	1.01	0.374243
7908161	NM_030806	C1orf21	chromosome 1 open reading frame 21	1q25	6.02366	6.12873	5.80168	5.85659	-1.04	0.084041
7908169	NM_007212	RNF2	ring finger protein 2	1q25.3	7.08247	7.00601	7.04651	7.09847	1	0.610503
7908178	NM_017673	C1orf26	chromosome 1 open reading frame 26	1q25	3.79854	3.7777	3.60664	3.47005	-1.07	0.162975
7908204	NM_031935	HMCN1	hemicentin 1	1q25.3-q31.1	3.31	3.32553	3.24329	3.26791	-1.02	0.067725
7908312	NM_005807	PRG4	proteoglycan 4	1q25-q31	1.87562	1.86643	1.87373	1.98596	1.03	0.484264
7908330	NM_017847	C1orf27	chromosome 1 open reading frame 27	1q25	6.01138	5.86184	5.81818	6.03243	-1	0.939742
7908347	NM_022375	OCLM	oculomedin	1q25	4.16736	4.35652	3.93825	4.25349	-1.04	0.479168
7908351	NM_024420	PLA2G4A	phospholipase A2, group IVA (cytosolic, calcium-dependent)	1q25	5.4132	5.47775	5.06436	5.32836	-1.05	0.297165
7908371	BC040856	C1orf99	chromosome 1 open reading frame 99	1q31.1	2.22485	2.16344	1.84791	1.92569	-1.16	0.028363
7908376	NM_130782	RGS18	regulator of G-protein signaling 18	1q31.2	1.28765	1.32082	1.02376	1.13587	-1.21	0.132888
7908382	NM_001039152	RGS21	regulator of G-protein signaling 21	1q31.1	1.95191	1.93184	1.99686	1.96983	1.02	0.143083
7908388	NM_002922	RGS1	regulator of G-protein signaling 1	1q31	1.40063	1.512	1.47095	1.43879	-1	0.983681
7908397	NM_002927	RGS13	regulator of G-protein signaling 13	1q31.2	1.99457	2.48286	2.45539	2.13283	1.02	0.869647
7908407	NM_002954	RPS27A	ribosomal protein S27a	2p16	8.67526	8.49889	8.60054	8.83759	1.02	0.472512
7908409	NM_002923	RGS2	regulator of G-protein signaling 2, 24kDa	1q31	6.77645	6.78084	6.12617	6.13685	-1.11	0.001326
7908421	NM_004600	TROVE2	TROVE domain family, member 2	1q31	7.87009	7.81993	7.85971	7.9201	1.01	0.374508
7908437	NM_024529	CDC73	cell division cycle 73, Paf1/RNA polymerase II complex component, homolog (S. cerevisiae)	1q25	7.65862	7.70697	7.82438	7.60621	1	0.816391
7908459	NM_000186	CFH	complement factor H	1q32	2.13902	2.38618	2.29161	2.13241	-1.02	0.768398
7908481	NM_021023	CFHR3	complement factor H-related 3	1q32	1.261	1.6945	1.97548	1.42366	1.15	0.595028
7908488	NM_002113	CFHR1	complement factor H-related 1	1q32	2.20342	1.87617	1.99839	2.34208	1.06	0.637817
7908492	NM_006684	CFHR4	complement factor H-related 4	1q32	1.53139	2.2536	1.63505	1.50368	-1.21	0.532969
7908496	NM_005666	CFHR2	complement factor H-related 2	1q31-q32.1	1.56966	1.788	1.61726	1.28934	-1.16	0.385395
7908499	NM_030787	CFHR5	complement factor H-related 5	1q22-q23	1.40967	1.55774	1.72503	1.67012	1.14	0.180298
7908508	NM_201253	CRB1	crumbs homolog 1 (Drosophila)	1q31-q32.1	2.53323	2.68431	2.60738	2.48979	-1.02	0.597161
7908525	NM_001024594	C1orf53	chromosome 1 open reading frame 53	1q31.3	5.05979	5.04631	5.24025	5.23943	1.04	0.022466
7908529	NM_020204	LHX9	LIM homeobox 9	1q31-q32	3.71865	3.63505	3.57646	3.65814	-1.02	0.415459
7908543	NM_133494	NEK7	NIMA (never in mitosis gene a)-related kinase 7	1q31.3	6.45467	6.65046	6.991	6.67215	1.04	0.297871
7908553	NM_002838	PTPRC	protein tyrosine phosphatase, receptor type, C	1q31-q32	1.42989	1.54238	1.57658	1.38352	-1	0.962536
7908597	NM_205860	NR5A2	nuclear receptor subfamily 5, group A, member 2	1q32.1	3.97144	3.98655	4.09722	3.9767	1.01	0.510934
7908612	NM_001105517	FAM58B	family with sequence similarity 58, member B	1q32.1	4.07498	4.10361	4.25846	4.10692	1.02	0.428969
7908614	NM_203459	CAMSAP1L1	calmodulin regulated spectrin-associated protein 1-like 1	1q32.1	7.06434	6.87771	6.96488	6.91458	-1	0.795212
7908637	NM_005298	GPR25	G protein-coupled receptor 25	1q32.1	5.89621	6.06575	5.95256	5.79531	-1.02	0.452743
7908639	NM_018265	C1orf106	chromosome 1 open reading frame 106	1q32.1	5.04155	4.80208	5.05233	5.3244	1.05	0.281059
7908650	ENST00000412892	IGFN1	immunoglobulin-like and fibronectin type III domain containing 1	1q32.1	4.19428	4.08675	4.03895	4.10617	-1.02	0.413822
7908672	NM_000299	PKP1	plakophilin 1 (ectodermal dysplasia/skin fragility syndrome)	1q32	3.79381	3.80562	3.62026	3.76886	-1.03	0.390414
7908692	NR_026667	RPS10P7	ribosomal protein S10 pseudogene 7	1q32.1	3.98819	4.15909	4.12188	4.1303	1.01	0.649454
7908694	NM_020443	NAV1	neuron navigator 1	1q32.3	6.55709	6.4075	6.71167	6.63838	1.03	0.192336
7908732	NM_018085	IPO9	importin 9	1q32.1	7.92224	7.95261	8.39764	8.22073	1.05	0.140095
7908758	NM_198149	SHISA4	shisa homolog 4 (Xenopus laevis)	1q32.1	6.8046	6.82849	6.97463	7.04657	1.03	0.090489
7908766	NM_006335	TIMM17A	translocase of inner mitochondrial membrane 17 homolog A (yeast)	1q32.1	6.75317	6.95242	7.50464	7.31044	1.08	0.057581
7908779	NM_020216	RNPEP	arginyl aminopeptidase (aminopeptidase B)	1q32	8.5869	8.59412	8.60201	8.60454	1	0.145397
7908793	NM_001114309	ELF3	E74-like factor 3 (ets domain transcription factor, epithelial-specific )	1q32.2	7.01348	7.06272	7.14201	7.27378	1.02	0.204602
7908812	NM_004767	GPR37L1	G protein-coupled receptor 37 like 1	1q32.1	5.29628	5.32881	5.33149	5.35812	1.01	0.269202
7908816	NM_001017403	LGR6	leucine-rich repeat-containing G protein-coupled receptor 6	1q32.1	3.16531	3.42379	3.49501	3.35994	1.04	0.483848
7908841	NM_032105	PPP1R12B	protein phosphatase 1, regulatory (inhibitor) subunit 12B	1q32.1	4.78788	5.1794	4.43287	4.53474	-1.11	0.220293
7908861	AF314543	OCR1	ovarian cancer-related protein 1	1q32.1	3.05265	2.74987	2.71212	3.53098	1.08	0.687426
7908863	BC032956	LOC641515	hypothetical protein LOC641515	1q31	3.3491	3.21445	3.25945	3.3618	1.01	0.767504
7908867	NM_138391	TMEM183A	transmembrane protein 183A	1q32.1	8.74645	8.66722	8.64283	8.72975	-1	0.760409
7908879	NM_015053	PPFIA4	protein tyrosine phosphatase, receptor type, f polypeptide (PTPRF), interacting protein (liprin), alpha 4	1q32.1	4.95987	4.93341	4.47418	4.70241	-1.08	0.19223
7908907	NM_000674	ADORA1	adenosine A1 receptor	1q32.1	5.6036	5.78527	5.97451	5.67332	1.02	0.552262
7908917	NM_006763	BTG2	BTG family, member 2	1q32	5.77407	5.93051	5.98157	5.86141	1.01	0.559746
7908924	NM_002725	PRELP	proline/arginine-rich end leucine-rich repeat protein	1q32	4.02356	4.11205	3.92039	3.94832	-1.03	0.178704
7908931	NM_014359	OPTC	opticin	1q32.1	3.33905	3.409	3.62372	3.41195	1.04	0.389967
7908940	NM_001001396	ATP2B4	ATPase, Ca++ transporting, plasma membrane 4	1q32.1	7.85286	7.50116	7.58314	8.02617	1.02	0.69797
7908966	BC000988	C1orf217	chromosome 1 open reading frame 217	1q32.1	3.40943	2.94992	3.30304	3.30187	1.04	0.687555
7908968	NM_017773	LAX1	lymphocyte transmembrane adaptor 1	1q32.1	2.91964	2.95874	2.94144	2.78379	-1.03	0.504498
7908978	NM_014827	ZC3H11A	zinc finger CCCH-type containing 11A	1q32.1	7.9881	7.69964	7.49866	7.74309	-1.03	0.362233
7908988	NM_003094	SNRPE	small nuclear ribonucleoprotein polypeptide E	1q32	4.3862	4.13039	4.29279	4.39947	1.02	0.617192
7908993	NM_005686	SOX13	SRY (sex determining region Y)-box 13	1q32	5.81608	5.59896	5.68111	6.02269	1.03	0.560878
7909011	NM_002393	MDM4	Mdm4 p53 binding protein homolog (mouse)	1q32	6.6905	6.38498	5.83633	6.26413	-1.08	0.217924
7909027	NM_001005388	NFASC	neurofascin homolog (chicken)	1q32.1	4.08176	3.93472	3.9984	4.19473	1.02	0.551302
7909064	NM_005076	CNTN2	contactin 2 (axonal)	1q32.1	3.84625	4.01999	4.07686	4.03767	1.03	0.380272
7909088	NM_014858	TMCC2	transmembrane and coiled-coil domain family 2	1q32.1	4.38642	4.22873	4.11625	4.46057	-1	0.93192
7909104	NM_212503	CDK18	cyclin-dependent kinase 18	1q31-q32	6.80263	6.55933	6.41789	6.78163	-1.01	0.750606
7909127	NM_181644	MFSD4	major facilitator superfamily domain containing 4	1q32.1	3.86196	3.82989	3.70948	3.94764	-1	0.907982
7909142	NM_022731	NUCKS1	nuclear casein kinase and cyclin-dependent kinase substrate 1	1q32.1	4.87122	4.89038	4.9733	5.00448	1.02	0.041582
7909144	AK094426	LOC284581	hypothetical protein LOC284581	1q32.1	4.34449	4.18079	4.52821	4.40124	1.05	0.198155
7909146	AB096683	FAM72D	family with sequence similarity 72, member D	1q21.1	7.26856	7.12236	6.5201	6.67955	-1.09	0.031953
7909155	NM_000707	AVPR1B	arginine vasopressin receptor 1B	1q32	2.6647	2.69482	2.57319	2.71973	-1.01	0.72872
7909164	NM_001910	CTSE	cathepsin E	1q31	3.03372	3.06045	3.11653	3.19867	1.04	0.200904
7909175	NM_015326	SRGAP2	SLIT-ROBO Rho GTPase activating protein 2	1q32.1	7.06729	6.89216	6.59182	6.98738	-1.03	0.505789
7909188	NM_014002	IKBKE	inhibitor of kappa light polypeptide gene enhancer in B-cells, kinase epsilon	1q32.1	4.68896	4.81585	5.47137	5.44429	1.15	0.047933
7909214	NM_182663	RASSF5	Ras association (RalGDS/AF-6) domain family member 5	1q32.1	5.93487	5.97386	5.83664	5.98876	-1.01	0.681002
7909225	NM_001004023	DYRK3	dual-specificity tyrosine-(Y)-phosphorylation regulated kinase 3	1q32.1	5.25304	5.18626	5.13922	5.18947	-1.01	0.325134
7909236	NM_004759	MAPKAPK2	mitogen-activated protein kinase-activated protein kinase 2	1q32	7.71871	7.48934	7.13219	7.52171	-1.04	0.368988
7909250	NM_153758	IL19	interleukin 19	1q32.2	2.69634	2.62962	2.60991	2.57446	-1.03	0.239789
7909261	NM_018724	IL20	interleukin 20	1q32	2.55277	2.88196	2.73509	2.58766	-1.02	0.796429
7909271	NM_006850	IL24	interleukin 24	1q32	2.6062	2.61842	2.59026	2.68216	1.01	0.694548
7909283	NM_018566	YOD1	YOD1 OTU deubiquinating enzyme 1 homolog (S. cerevisiae)	1q32.2	3.16929	3.05872	2.90279	3.17893	-1.02	0.692437
7909285	NM_006212	PFKFB2	6-phosphofructo-2-kinase/fructose-2,6-biphosphatase 2	1q31	5.34238	5.60704	5.55787	5.25425	-1.01	0.766208
7909306	NM_000716	C4BPB	complement component 4 binding protein, beta	1q32	3.15477	3.19827	3.16725	3.14329	-1.01	0.503508
7909318	NM_000715	C4BPA	complement component 4 binding protein, alpha	1q32	1.73811	1.76953	1.73523	1.71509	-1.02	0.284645
7909332	NM_001114752	CD55	CD55 molecule, decay accelerating factor for complement (Cromer blood group)	1q32	7.84107	7.8662	7.54076	7.87678	-1.02	0.546594
7909350	NM_001006658	CR2	complement component (3d/Epstein Barr virus) receptor 2	1q32	5.3406	5.0226	4.88633	5.10844	-1.04	0.452424
7909371	NM_000573	CR1	complement component (3b/4b) receptor 1 (Knops blood group)	1q32	1.96928	1.82307	1.81104	1.76627	-1.06	0.365829
7909390	NM_175710	CR1L	complement component (3b/4b) receptor 1-like	1q32.1	2.07521	1.72684	1.77598	1.93701	-1.02	0.845657
7909400	NM_002389	CD46	CD46 molecule, complement regulatory protein	1q32	7.43664	7.42028	7.28936	7.45813	-1.01	0.633508
7909418	NR_026817	LOC148696	hypothetical LOC148696	1q32.2	3.18483	3.33561	3.40162	3.23868	1.02	0.643644
7909422	NR_029622	MIR205	microRNA 205	1q32.2	3.18429	2.90317	3.04783	3.40502	1.06	0.50984
7909425	NM_020439	CAMK1G	calcium/calmodulin-dependent protein kinase IG	1q32-q41	3.50071	3.54362	3.42678	3.34095	-1.04	0.143921
7909441	NM_015714	G0S2	G0/G1switch 2	1q32.2	5.55046	5.45123	5.68708	5.69735	1.03	0.158221
7909446	NM_005525	HSD11B1	hydroxysteroid (11-beta) dehydrogenase 1	1q32-q41	2.70518	2.82586	2.69369	2.57291	-1.05	0.261514
7909455	NM_025228	TRAF3IP3	TRAF3 interacting protein 3	1q32	2.80018	2.72518	2.86725	2.76831	1.02	0.474222
7909478	NM_014388	C1orf107	chromosome 1 open reading frame 107	1q32.2	5.69025	5.76439	6.39353	6.17671	1.1	0.09444
7909494	NR_027458	SYT14	synaptotagmin XIV	1q32.2	1.87227	1.99466	1.96672	1.64096	-1.07	0.569098
7909503	NM_019605	SERTAD4	SERTA domain containing 4	1q32.1-q41	3.59026	3.59133	3.78278	3.82115	1.06	0.057509
7909510	NM_001170580	HHAT	hedgehog acyltransferase	1q32	4.80072	4.90981	4.7345	4.62244	-1.04	0.152287
7909529	NM_001136223	RCOR3	REST corepressor 3	1q32.2	5.87365	6.0086	6.34596	6.24636	1.06	0.05946
7909545	NM_145759	TRAF5	TNF receptor-associated factor 5	1q32	4.18953	3.96289	3.76295	4.0437	-1.04	0.44287
7909561	NR_026761	C1orf97	chromosome 1 open reading frame 97	1q32.3	4.37415	4.68246	4.77519	4.57425	1.03	0.521134
7909568	NM_016448	DTL	denticleless homolog (Drosophila)	1q32.1-q32.2	6.02086	6.09153	6.76414	6.59096	1.1	0.056249
7909586	NM_006243	PPP2R5A	protein phosphatase 2, regulatory subunit B', alpha	1q32.2-q32.3	7.27459	7.34624	7.0549	7.09086	-1.03	0.052966
7909601	NR_004389	SNORA16B	small nucleolar RNA, H/ACA box 16B	1q32.3	3.53532	3.28976	2.78484	3.2801	-1.13	0.34221
7909603	NM_013349	NENF	neuron derived neurotrophic factor	1q32.3	7.59795	7.64275	7.70362	7.60895	1	0.586906
7909610	NM_001040619	ATF3	activating transcription factor 3	1q32.3	5.02758	4.99907	4.61039	5.08229	-1.03	0.607765
7909624	NM_153606	FAM71A	family with sequence similarity 71, member A	1q32.3	3.15048	3.28539	3.11581	3.11368	-1.03	0.368543
7909628	NM_014053	FLVCR1	feline leukemia virus subgroup C cellular receptor 1	1q32.3	5.88717	5.8997	6.08195	6.19153	1.04	0.137083
7909642	NM_024749	VASH2	vasohibin 2	1q32.3	5.91751	5.77021	5.45514	5.53722	-1.06	0.080521
7909661	NM_012424	RPS6KC1	ribosomal protein S6 kinase, 52kDa, polypeptide 1	1q41	6.21458	6.02509	6.00212	6.30097	1.01	0.876887
7909681	NM_002763	PROX1	prospero homeobox 1	1q32.2-q32.3	2.55928	2.56541	2.34392	2.37945	-1.08	0.050027
7909689	NM_020197	SMYD2	SET and MYND domain containing 2	1q32.3-q41	5.74245	5.76531	6.26742	6.21141	1.08	0.017688
7909708	NM_016343	CENPF	centromere protein F, 350/400ka (mitosin)	1q32-q41	7.28333	7.24054	7.26409	6.99499	-1.02	0.502806
7909730	NM_001017425	KCNK2	potassium channel, subfamily K, member 2	1q41	2.50038	2.21011	2.3547	2.77662	1.09	0.506946
7909745	NM_016121	KCTD3	potassium channel tetramerisation domain containing 3	1q41	6.84706	6.85637	7.02387	6.97365	1.02	0.098386
7909768	NM_138796	SPATA17	spermatogenesis associated 17	1q41	3.66967	3.96829	4.30849	3.82874	1.07	0.485322
7909782	NM_016052	RRP15	ribosomal RNA processing 15 homolog (S. cerevisiae)	1q41	5.33483	5.18589	6.2443	6.1187	1.18	0.012034
7909789	NM_001135599	TGFB2	transforming growth factor, beta 2	1q41	3.65738	3.69067	3.98207	3.79149	1.06	0.260143
7909801	NM_138794	LYPLAL1	lysophospholipase-like 1	1q41	4.56231	4.2566	4.56654	4.5584	1.03	0.499589
7909815	NM_018060	IARS2	isoleucyl-tRNA synthetase 2, mitochondrial	1q41	7.8799	7.92085	8.02739	7.95927	1.01	0.171369
7909841	NM_018650	MARK1	MAP/microtubule affinity-regulating kinase 1	1q41	4.96045	4.73383	5.19496	5.0435	1.06	0.202279
7909862	NM_024709	C1orf115	chromosome 1 open reading frame 115	1q41	6.34871	6.31928	6.13993	6.07383	-1.04	0.05566
7909866	NM_017898	MOSC2	MOCO sulphurase C-terminal domain containing 2	1q41	5.69015	5.80317	5.5639	5.69043	-1.02	0.295728
7909877	NM_022746	MOSC1	MOCO sulphurase C-terminal domain containing 1	1q41	5.42322	5.54083	6.19707	5.96634	1.11	0.074061
7909890	NM_021958	HLX	H2.0-like homeobox	1q41-q42.1	4.80951	4.76272	4.73263	4.61581	-1.02	0.278276
7909898	NM_198551	MIA3	melanoma inhibitory activity family, member 3	1q41	6.84348	6.76609	6.31407	6.57414	-1.06	0.197913
7909931	NM_144695	C1orf58	chromosome 1 open reading frame 58	1q41	7.59179	7.72293	7.65859	7.46627	-1.01	0.51009
7909946	NM_207468	FAM177B	family with sequence similarity 177, member B	1q41	2.29898	2.54136	2.52127	2.32747	1	0.980967
7909954	NM_032890	DISP1	dispatched homolog 1 (Drosophila)	1q41	4.87693	4.84939	5.01621	4.95	1.02	0.132862
7909965	NM_152610	C1orf65	chromosome 1 open reading frame 65	1q41	4.90522	5.13035	5.09118	4.96183	1	0.953898
7909967	NM_001748	CAPN2	calpain 2, (m/II) large subunit	1q41-q42	8.78611	8.69481	9.33472	9.32624	1.07	0.047401
7909990	AK290103	LOC100287934	similar to hCG2042721	1p36.33	4.41087	4.42379	3.9849	3.83485	-1.13	0.09142
7909992	NM_015176	FBXO28	F-box protein 28	1q42.11	7.17096	7.23476	7.50912	7.25647	1.02	0.379565
7910001	NM_003676	DEGS1	degenerative spermatocyte homolog 1, lipid desaturase (Drosophila)	1q42.11	6.29732	6.06043	6.40049	6.30662	1.03	0.359354
7910014	NM_014184	CNIH4	cornichon homolog 4 (Drosophila)	1q42.11	6.89993	7.06552	7.48212	7.25514	1.06	0.12204
7910022	NM_152495	CNIH3	cornichon homolog 3 (Drosophila)	1q42.12	3.00834	3.22066	3.04385	2.97614	-1.03	0.498345
7910030	NM_001145154	DNAH14	dynein, axonemal, heavy chain 14	1q42.12	4.20496	4.00479	4.05985	4.21159	1.01	0.830327
7910047	NM_001373	DNAH14	dynein, axonemal, heavy chain 14	1q42.12	2.87518	3.1664	3.5774	3.12302	1.11	0.364469
7910054	NM_001373	DNAH14	dynein, axonemal, heavy chain 14	1q42.12	2.69792	2.66784	2.81603	2.72138	1.03	0.301489
7910096	NM_002296	LBR	lamin B receptor	1q42.1	2.98099	3.14776	2.93203	2.77388	-1.07	0.20753
7910099	NM_001130440	SRP9	signal recognition particle 9kDa	1q42.12	7.36002	7.50068	7.42288	7.30599	-1.01	0.548059
7910111	NM_000120	EPHX1	epoxide hydrolase 1, microsomal (xenobiotic)	1q42.1	6.38617	6.66713	6.83155	6.62105	1.03	0.381089
7910124	NM_002107	H3F3A	H3 histone, family 3A	1q41	9.36372	9.47643	9.14977	9.22736	-1.03	0.091084
7910134	NM_031944	MIXL1	Mix1 homeobox-like 1 (Xenopus laevis)	1q42.12	5.00049	4.94026	5.06676	5.12503	1.03	0.09584
7910142	NM_001003665	C1orf95	chromosome 1 open reading frame 95	1q42.12	4.30935	4.24232	4.32649	4.3353	1.01	0.344403
7910146	NM_000447	PSEN2	presenilin 2 (Alzheimer disease 4)	1q31-q42	5.61956	5.52927	5.93868	5.76933	1.05	0.1363
7910164	NM_020247	CABC1	chaperone, ABC1 activity of bc1 complex homolog (S. pombe)	1q42.13	6.52426	6.48673	6.25638	6.26319	-1.04	0.042256
7910184	BC062736	LOC503543	basic transcription factor 3, pseudogene 9	1q42	3.45061	3.35104	3.39105	3.50029	1.01	0.606159
7910190	NR_033184	ZNF678	zinc finger protein 678	1q42.13	3.75628	3.77696	3.61343	3.74943	-1.02	0.425457
7910198	NM_178549	ZNF678	zinc finger protein 678	1q42.13	4.97977	4.74998	4.22347	4.42937	-1.12	0.074442
7910200	NM_053052	SNAP47	synaptosomal-associated protein, 47kDa	1q42.13	6.10333	6.14915	5.97056	6.04429	-1.02	0.134886
7910211	NM_183062	PRSS38	protease, serine, 38	1q42.13	3.16453	3.18349	2.94918	3.02025	-1.06	0.099785
7910217	NM_033131	WNT3A	wingless-type MMTV integration site family, member 3A	1q42	4.7398	4.49553	4.77148	4.93438	1.05	0.267827
7910229	NM_001024226	ARF1	ADP-ribosylation factor 1	1q42	9.97328	9.83006	9.8265	9.97953	1	0.990977
7910241	NM_000858	GUK1	guanylate kinase 1	1q32-q41	7.96186	7.98397	7.95614	7.90237	-1.01	0.327491
7910257	NM_020435	GJC2	gap junction protein, gamma 2, 47kDa	1q42.13	6.81391	6.74462	6.74053	6.77164	-1	0.626365
7910261	NM_001010867	C1orf69	chromosome 1 open reading frame 69	1q42.13	4.11576	4.26488	4.47274	4.37967	1.06	0.138425
7910265	NM_001098623	OBSCN	obscurin, cytoskeletal calmodulin and titin-interacting RhoGEF	1q42.13	4.66845	4.67096	4.53845	4.57817	-1.02	0.111169
7910369	NM_175055	HIST3H2BB	histone cluster 3, H2bb	1q42.13	4.05796	4.16203	3.90673	4.17079	-1.02	0.687296
7910372	NM_001010858	RNF187	ring finger protein 187	1q42.13	7.94311	7.8964	8.11073	8.09834	1.02	0.064273
7910379	NR_002834	DUSP5P	dual specificity phosphatase 5 pseudogene	1q42.13	2.89329	2.93205	2.85636	3.04156	1.01	0.762725
7910381	AK055963	DUSP5P	dual specificity phosphatase 5 pseudogene	1q42.13	4.03866	3.53025	3.59128	3.68651	-1.04	0.668618
7910387	NM_021205	RHOU	ras homolog gene family, member U	1q42.11-q42.3	6.12717	5.93318	5.63543	5.79038	-1.06	0.131012
7910396	ENST00000323223	TMEM78	transmembrane protein 78	1q42.13	2.30831	2.37794	2.81651	2.62785	1.16	0.122777
7910398	NM_004578	RAB4A	RAB4A, member RAS oncogene family	1q42-q43	5.44154	5.60321	5.57626	5.56447	1.01	0.658853
7910416	NM_014777	URB2	URB2 ribosome biogenesis 2 homolog (S. cerevisiae)	1q42.13	6.08089	6.00097	6.48933	6.24767	1.05	0.19865
7910427	NM_004481	GALNT2	UDP-N-acetyl-alpha-D-galactosamine:polypeptide N-acetylgalactosaminyltransferase 2 (GalNAc-T2)	1q41-q42	7.72939	7.54343	7.52792	7.67111	-1	0.784682
7910446	NM_007357	COG2	component of oligomeric golgi complex 2	1q42.2	6.36244	6.12598	6.3125	6.19175	1	0.95947
7910466	NM_006615	CAPN9	calpain 9	1q42.11-q42.3	2.44309	2.41183	2.54037	2.62471	1.06	0.136217
7910494	NM_022786	ARV1	ARV1 homolog (S. cerevisiae)	1q42.2	5.60419	5.49844	4.79476	5.06208	-1.13	0.099369
7910503	NM_001004342	TRIM67	tripartite motif-containing 67	1q42.2	4.19647	4.40299	4.39272	4.19906	-1	0.980852
7910520	NM_014236	GNPAT	glyceronephosphate O-acyltransferase	1q42	7.81555	7.9028	8.05193	7.77502	1.01	0.763781
7910539	NM_001010984	C1orf124	chromosome 1 open reading frame 124	1q42.12-q43	6.61722	6.59377	6.53265	6.55218	-1.01	0.056874
7910550	NM_005999	TSNAX	translin-associated factor X	1q42.1	6.90103	7.0886	7.36396	7.1292	1.04	0.241782
7910559	NM_001164537	DISC1	disrupted in schizophrenia 1	1q42.1	3.59834	3.80278	3.70059	3.54246	-1.02	0.606472
7910589	NM_019090	KIAA1383	KIAA1383	1q42.2	3.1609	3.20304	3.33836	3.24854	1.04	0.203141
7910591	NM_032324	C1orf57	chromosome 1 open reading frame 57	1q42.2	6.90885	6.96893	7.06379	7.01025	1.01	0.136553
7910600	NM_032435	KIAA1804	mixed lineage kinase 4	1q42	6.17667	6.0709	6.1124	6.08202	-1	0.704176
7910611	NM_002245	KCNK1	potassium channel, subfamily K, member 1	1q42-q43	6.19181	6.11285	6.05031	6.07589	-1.01	0.241674
7910618	NM_173508	SLC35F3	solute carrier family 35, member F3	1q42.2	5.32085	5.2818	5.35575	5.15408	-1.01	0.725583
7910630	BC116455	C1orf31	chromosome 1 open reading frame 31	1q42.2	5.89891	5.7641	5.54229	5.70648	-1.04	0.195293
7910640	NM_004837	GGPS1	geranylgeranyl diphosphate synthase 1	1q43	5.30358	5.21729	5.09918	5.12498	-1.03	0.156798
7910651	NM_001079515	TBCE	tubulin folding cofactor E	1q42.3	6.16464	6.04238	6.40525	6.30118	1.04	0.092552
7910680	NM_003272	GPR137B	G protein-coupled receptor 137B	1q42-q43	7.46572	7.45064	7.28221	7.41636	-1.01	0.348761
7910694	NM_080738	EDARADD	EDAR-associated death domain	1q42.3-q43	3.80853	3.9122	4.23259	4.20577	1.09	0.075349
7910706	NM_006499	LGALS8	lectin, galactoside-binding, soluble, 8	1q42-q43	6.17591	6.30617	6.22666	6.17535	-1.01	0.650239
7910727	NM_001103	ACTN2	actinin, alpha 2	1q42-q43	2.63436	2.82737	2.68536	2.71043	-1.01	0.790624
7910752	NM_000254	MTR	5-methyltetrahydrofolate-homocysteine methyltransferase	1q43	5.836	5.80619	5.59922	5.65891	-1.03	0.055507
7910792	NM_001035	RYR2	ryanodine receptor 2 (cardiac)	1q42.1-q43	2.04617	2.04077	2.1844	2.16584	1.06	0.031352
7910901	NR_027247	LOC100130331	actin, gamma-like	1q43	8.34128	8.2833	8.52582	8.36633	1.02	0.320717
7910915	NM_000740	CHRM3	cholinergic receptor, muscarinic 3	1q43	1.62378	1.60968	1.62683	1.47181	-1.04	0.543705
7910923	NM_020066	FMN2	formin 2	1q43	2.42839	2.27046	2.2397	2.25935	-1.04	0.423435
7910950	NM_003679	KMO	kynurenine 3-monooxygenase (kynurenine 3-hydroxylase)	1q42-q44	1.50013	1.63858	1.62783	1.50194	-1	0.966292
7910971	NM_144625	WDR64	WD repeat domain 64	1q43	1.54817	1.64927	1.50803	1.43571	-1.09	0.191158
7910997	NM_130398	EXO1	exonuclease 1	1q42-q43	5.48037	5.92245	6.66348	6.22389	1.13	0.140206
7911017	NM_006642	SDCCAG8	serologically defined colon cancer antigen 8	1q43	4.99765	5.03302	4.79619	5.02204	-1.02	0.517437
7911038	NM_205768	ZNF238	zinc finger protein 238	1q44-qter	5.79852	5.58122	5.03493	5.3374	-1.1	0.126043
7911045	ENST00000452677	LOC440742	hypothetical LOC440742	1q44	2.42226	2.50333	2.58317	2.44453	1.02	0.603162
7911049	NM_001012970	C1orf100	chromosome 1 open reading frame 100	1q44	1.85453	2.12488	2.43086	2.24792	1.18	0.182744
7911056	NM_001130957	C1orf101	chromosome 1 open reading frame 101	1q44	2.5234	2.31546	2.3606	2.44292	-1.01	0.895286
7911078	NM_016076	PPPDE1	PPPDE peptidase domain containing 1	1q44	6.63167	6.79625	6.49983	6.54859	-1.03	0.239894
7911085	NM_198076	FAM36A	family with sequence similarity 36, member A	1q44	6.03862	6.22325	6.20333	6.10146	1	0.862089
7911096	NR_026588	EFCAB2	EF-hand calcium binding domain 2	1q44	3.74337	3.87796	4.31494	4.04186	1.1	0.181841
7911112	NR_026586	EFCAB2	EF-hand calcium binding domain 2	1q44	3.01244	3.05535	2.88016	2.75658	-1.08	0.148053
7911114	NM_018012	KIF26B	kinesin family member 26B	1q44	4.06626	4.005	4.29774	4.32968	1.07	0.03229
7911138	NM_152609	CNST	consortin, connexin sorting protein	1q44	4.57711	4.54121	4.54599	4.60682	1	0.683276
7911155	NM_016002	SCCPDH	saccharopine dehydrogenase (putative)	1q44	2.58403	2.66487	2.64061	2.61589	1	0.94116
7911170	NR_015422	LOC149134	hypothetical LOC149134	1q44	3.1553	3.31933	2.98591	3.00989	-1.08	0.203867
7911174	NM_173858	VN1R5	vomeronasal 1 receptor 5 (gene/pseudogene)	1q44	1.48382	1.66817	1.49644	1.44969	-1.07	0.458248
7911178	NM_004895	NLRP3	NLR family, pyrin domain containing 3	1q44	2.50354	2.50052	2.54134	2.58961	1.03	0.23023
7911197	NM_001004698	OR2W5	olfactory receptor, family 2, subfamily W, member 5	1q44	3.56776	3.73884	3.88088	3.39302	-1	0.958193
7911199	NM_145278	C1orf150	chromosome 1 open reading frame 150	1q44	1.85316	1.82915	1.65785	1.659	-1.11	0.041324
7911207	NM_001001915	OR2G2	olfactory receptor, family 2, subfamily G, member 2	1q44	2.87568	3.1029	2.9723	2.68494	-1.06	0.477111
7911209	NM_001001914	OR2G3	olfactory receptor, family 2, subfamily G, member 3	1q44	2.51032	2.22411	2.37598	2.42688	1.01	0.85103
7911215	AY358215	OR9H1P	olfactory receptor, family 9, subfamily H, member 1 pseudogene	1q44	2.5446	2.43852	2.40011	2.24911	-1.07	0.226372
7911218	NM_015431	TRIM58	tripartite motif-containing 58	1q44	4.55743	4.53946	4.42189	4.50337	-1.02	0.270408
7911229	NM_001001957	OR2W3	olfactory receptor, family 2, subfamily W, member 3	1q44	4.20474	4.12434	3.95472	4.13947	-1.03	0.407996
7911231	NM_001001957	OR2W3	olfactory receptor, family 2, subfamily W, member 3	1q44	4.20474	4.12434	3.95472	4.13947	-1.03	0.407996
7911233	NM_001005522	OR2T8	olfactory receptor, family 2, subfamily T, member 8	1q44	3.23867	3.48227	3.10227	3.42913	-1.03	0.690913
7911235	ENST00000318244	OR2AJ1	olfactory receptor, family 2, subfamily AJ, member 1	1q44	1.70939	1.70769	1.57176	1.66252	-1.06	0.293312
7911237	NM_175911	OR2L13	olfactory receptor, family 2, subfamily L, member 13	1q44	2.97731	3.1486	3.34555	2.98841	1.03	0.668935
7911241	NM_001001963	OR2L8	olfactory receptor, family 2, subfamily L, member 8	1q44	3.63124	3.76388	3.56077	3.08591	-1.11	0.346353
7911243	NM_001004491	OR2AK2	olfactory receptor, family 2, subfamily AK, member 2	1q44	1.8798	1.81747	1.73803	1.9054	-1.01	0.804875
7911248	ENST00000355281	OR2L5	olfactory receptor, family 2, subfamily L, member 5	1q44	1.89687	1.94602	1.97462	1.80444	-1.02	0.772938
7911252	NM_001004686	OR2L2	olfactory receptor, family 2, subfamily L, member 2	1q44	2.8703	3.03006	2.66605	2.59923	-1.12	0.118097
7911258	NM_001004687	OR2L3	olfactory receptor, family 2, subfamily L, member 3	1q44	3.13676	3.19746	2.98781	3.10748	-1.04	0.258635
7911260	NR_002141	OR2M1P	olfactory receptor, family 2, subfamily M, member 1 pseudogene	1q44	2.52481	2.85033	2.92291	2.68889	1.04	0.620045
7911263	NM_001004690	OR2M5	olfactory receptor, family 2, subfamily M, member 5	1q44	3.53631	3.60366	3.4725	3.27302	-1.06	0.275269
7911265	NM_001004688	OR2M2	olfactory receptor, family 2, subfamily M, member 2	1q44	1.44647	1.63998	1.71557	1.31333	-1.02	0.913078
7911267	NM_001004689	OR2M3	olfactory receptor, family 2, subfamily M, member 3	1q44	1.93231	2.07993	1.95078	1.95645	-1.03	0.606326
7911269	NM_017504	OR2M4	olfactory receptor, family 2, subfamily M, member 4	1q44	2.94618	2.90629	2.4858	2.39641	-1.2	0.029824
7911271	NM_001001918	OR14C36	olfactory receptor, family 14, subfamily C, member 36	1q44	2.6104	2.77787	2.81763	2.85128	1.05	0.334263
7911273	NM_001004696	OR2T4	olfactory receptor, family 2, subfamily T, member 4	1q44	1.53596	1.65755	1.73468	1.71061	1.08	0.276827
7911276	NM_001005471	OR2T6	olfactory receptor, family 2, subfamily T, member 6	1q44	1.6234	1.999	2.21869	1.92397	1.14	0.395063
7911278	NM_030904	OR2T1	olfactory receptor, family 2, subfamily T, member 1	1q44	2.59389	2.78234	2.95379	2.68189	1.05	0.523633
7911281	NM_001004136	OR2T2	olfactory receptor, family 2, subfamily T, member 2	1q44	3.38808	3.50922	3.34699	3.33771	-1.03	0.328347
7911283	NM_001005495	OR2T3	olfactory receptor, family 2, subfamily T, member 3	1q44	2.06674	2.44138	2.69147	2.37814	1.12	0.372349
7911285	NM_001004697	OR2T5	olfactory receptor, family 2, subfamily T, member 5	1q44	1.67802	1.86617	1.72805	1.4518	-1.11	0.402232
7911287	NM_001013355	OR2G6	olfactory receptor, family 2, subfamily G, member 6	1q44	2.96221	3.07039	2.8028	2.82422	-1.07	0.15463
7911289	NM_024836	ZNF672	zinc finger protein 672	1q44	6.20557	6.09599	6.10783	6.07409	-1.01	0.463664
7911301	NM_170725	PGBD2	piggyBac transposable element derived 2	1q44	3.65069	3.83342	4.09167	3.70022	1.04	0.575067
7911307	NR_026981	RPL23AP82	ribosomal protein L23a pseudogene 82	22q13.33	6.81992	6.61993	6.51014	6.65728	-1.02	0.39552
7911309	NR_024540	WASH7P	WAS protein family homolog 7 pseudogene	1p36.33	7.43035	7.35757	7.22283	7.33767	-1.02	0.258302
7911323	NR_026818	FAM138A	family with sequence similarity 138, member A	1p36.33	2.05051	2.25279	2.00159	1.85813	-1.11	0.229093
7911329	NM_207366	2011-09-14	septin 14	7p11.2	5.74925	5.78677	5.43586	5.5097	-1.05	0.039964
7911333	NR_029406	FLJ43681	ribosomal protein L23a pseudogene	17q25.3	6.68675	6.59418	6.5225	6.50686	-1.02	0.216377
7911339	NR_031741	MIR1977	microRNA 1977	---	9.27569	9.59202	9.09772	8.68316	-1.06	0.181327
7911343	AF284753	UIMC1	ubiquitin interaction motif containing 1	5q35.2	10.2378	10.4398	10.1048	9.61921	-1.05	0.269816
7911345	NM_001005277	OR4F16	olfactory receptor, family 4, subfamily F, member 16	1p36.33	3.59464	3.75522	3.04965	3.03494	-1.21	0.078199
7911347	NM_207366	2011-09-14	septin 14	7p11.2	5.11277	5.25255	4.86509	4.87778	-1.06	0.138127
7911351	NR_024321	NCRNA00115	non-protein coding RNA 115	1p36.33	5.53226	5.5631	5.58376	5.67359	1.01	0.300841
7911355	NM_177987	TUBB8	tubulin, beta 8	10p15.3	6.47827	6.54862	6.6381	6.48628	1.01	0.639436
7911359	NM_015658	NOC2L	nucleolar complex associated 2 homolog (S. cerevisiae)	1p36.33	8.34834	8.29662	8.70067	8.7158	1.05	0.029435
7911371	NR_027693	C1orf170	chromosome 1 open reading frame 170	1p36.33	4.43803	4.66129	4.74899	4.54233	1.02	0.592814
7911376	NM_001142467	HES4	hairy and enhancer of split 4 (Drosophila)	1p36.33	6.59226	6.73055	6.46701	6.54324	-1.02	0.221308
7911383	NM_017891	C1orf159	chromosome 1 open reading frame 159	1p36.33	5.01149	4.93223	4.94507	5.06037	1.01	0.707034
7911403	NM_004195	TNFRSF18	tumor necrosis factor receptor superfamily, member 18	1p36.3	6.83189	6.70149	6.73435	6.79202	-1	0.966973
7911413	NM_003327	TNFRSF4	tumor necrosis factor receptor superfamily, member 4	1p36	5.54237	5.68075	5.66177	5.68647	1.01	0.529667
7911422	NM_016547	SDF4	stromal cell derived factor 4	1p36.33	7.59833	7.52959	7.67005	7.72666	1.02	0.098667
7911435	NM_001014980	FAM132A	family with sequence similarity 132, member A	1p36.33	5.16422	5.03067	5.0461	5.28722	1.01	0.677213
7911444	NM_194458	UBE2J2	ubiquitin-conjugating enzyme E2, J2 (UBC6 homolog, yeast)	1p36.33	6.17174	6.00469	6.21137	6.11423	1.01	0.537387
7911458	NM_030649	ACAP3	ArfGAP with coiled-coil, ankyrin repeat and PH domains 3	---	6.43405	6.27401	6.44653	6.48303	1.02	0.390136
7911486	NM_017871	CPSF3L	cleavage and polyadenylation specific factor 3-like	1p36.33	7.45319	7.18763	7.12497	7.30671	-1.01	0.589919
7911506	NM_004421	DVL1	dishevelled, dsh homolog 1 (Drosophila)	1p36	7.88575	7.68815	7.70625	7.87121	1	0.990264
7911529	NM_032348	MXRA8	matrix-remodelling associated 8	1p36.33	7.38427	7.63827	7.53363	7.37577	-1.01	0.747714
7911532	NM_017900	AURKAIP1	aurora kinase A interacting protein 1	1p36.33	7.48142	7.44591	7.77103	7.71562	1.04	0.021546
7911539	NM_030937	CCNL2	cyclin L2	1p36.33	7.2341	7.31399	6.94212	7.00314	-1.04	0.031197
7911559	NM_017971	MRPL20	mitochondrial ribosomal protein L20	1p36.3-p36.2	6.64216	6.80153	7.24421	6.97789	1.06	0.156115
7911568	NM_014188	SSU72	SSU72 RNA polymerase II CTD phosphatase homolog (S. cerevisiae)	1p36.33	6.95397	6.91039	6.98267	7.05044	1.01	0.192757
7911578	NM_024011	CDK11A	cyclin-dependent kinase 11A	1p36.33	6.47494	6.17805	6.09757	6.23491	-1.03	0.465211
7911591	NM_001110781	SLC35E2	similar to solute carrier family 35, member E2	1p36.33	6.22109	6.16718	6.34112	6.29798	1.02	0.073048
7911600	NM_023018	NADK	NAD kinase	1p36.33-p36.21	6.10931	6.28911	6.3169	6.2891	1.02	0.451358
7911619	NM_002074	GNB1	guanine nucleotide binding protein (G protein), beta polypeptide 1	1p36.33	10.1822	10.2323	10.155	10.1079	-1.01	0.158689
7911634	NM_178545	TMEM52	transmembrane protein 52	1p36.33	5.96653	5.93346	6.06808	6.19327	1.03	0.193825
7911643	BC114926	C1orf222	chromosome 1 open reading frame 222	1p36.33	4.02086	3.83845	3.04891	3.65304	-1.17	0.287547
7911657	AK094642	LOC728690	hypothetical protein LOC728690	1p36.33	5.5233	5.34643	5.67604	5.62066	1.04	0.226965
7911659	ENST00000270720	KIAA1751	KIAA1751	1p36.33	4.39015	4.15659	4.14304	4.17258	-1.03	0.501799
7911683	NM_182533	C1orf86	chromosome 1 open reading frame 86	1p36.33	5.78381	5.71443	5.6492	5.75085	-1.01	0.51807
7911699	AK024162	FLJ14100	hypothetical protein FLJ14100	1p36.33	5.75281	5.84594	6.13321	5.84781	1.03	0.39475
7911701	NM_024848	MORN1	MORN repeat containing 1	1p36.33-p36.32	5.40843	5.47063	5.00217	5.09477	-1.08	0.027793
7911718	NR_024489	LOC100129534	small nuclear ribonucleoprotein polypeptide N pseudogene	1p36.33	4.1783	4.2192	4.38115	4.41411	1.05	0.019206
7911720	NM_153818	PEX10	peroxisomal biogenesis factor 10	1p36.32	5.46867	5.44612	5.68568	5.47585	1.02	0.447062
7911730	NM_018216	PANK4	pantothenate kinase 4	1p36.32	6.08254	6.05162	5.73198	5.78829	-1.05	0.023026
7911750	NM_001010926	HES5	hairy and enhancer of split 5 (Drosophila)	1p36.32	5.70606	5.58739	5.74177	5.77224	1.02	0.300224
7911754	NM_003820	TNFRSF14	tumor necrosis factor receptor superfamily, member 14 (herpesvirus entry mediator)	1p36.3-p36.2	5.02649	4.97154	4.84806	4.96298	-1.02	0.323426
7911767	NM_033467	MMEL1	membrane metallo-endopeptidase-like 1	1p36	4.25254	4.13762	4.01634	3.95775	-1.05	0.12235
7911793	NR_015440	FLJ42875	hypothetical LOC440556	1p36.32	5.1383	5.35526	5.31701	5.07759	-1.01	0.78858
7911796	NR_024371	FLJ42875	hypothetical LOC440556	1p36.32	4.78909	4.57487	4.9394	4.93091	1.05	0.254352
7911799	NM_001409	MEGF6	multiple EGF-like-domains 6	1p36.3	6.04525	6.09499	5.88864	5.84193	-1.03	0.026887
7911839	NM_017818	WDR8	WD repeat domain 8	1p36.3	6.02781	6.03194	6.13787	6.14941	1.02	0.017597
7911854	NM_207306	KIAA0495	KIAA0495	1p36.32	3.02614	3.17153	2.73742	3.03905	-1.07	0.374696
7911862	NM_020710	LRRC47	leucine rich repeat containing 47	1p36.32	7.55773	7.64252	7.81482	7.75704	1.02	0.082325
7911870	NM_014704	KIAA0562	KIAA0562	1p36.32	6.38395	6.31715	6.40546	6.32235	1	0.826555
7911897	NM_207356	C1orf174	chromosome 1 open reading frame 174	1p36.32	6.9549	6.93543	6.3398	6.61426	-1.07	0.179985
7911902	NM_015102	NPHP4	nephronophthisis 4	1p36.22	5.41861	5.2736	5.03434	5.21299	-1.04	0.198212
7911941	NM_015557	CHD5	chromodomain helicase DNA binding protein 5	1p36.31	5.34083	5.16985	5.69048	5.77447	1.09	0.068733
7911989	NM_000983	RPL22	ribosomal protein L22	1p36.3-p36.2	5.40127	5.45644	5.63998	5.31148	1.01	0.823414
7911993	NM_012405	ICMT	isoprenylcysteine carboxyl methyltransferase	1p36.21	7.6243	7.70744	7.7711	7.75365	1.01	0.247589
7912004	NM_207370	GPR153	G protein-coupled receptor 153	1p36.31	6.30342	6.18985	6.01597	6.13245	-1.03	0.168222
7912012	NM_007274	ACOT7	acyl-CoA thioesterase 7	1p36.31-p36.11	7.54383	7.54464	7.65423	7.64534	1.01	0.02562
7912031	NM_019089	HES2	hairy and enhancer of split 2 (Drosophila)	1p36.31-p36.11	5.57323	5.69826	5.87439	5.70635	1.03	0.287439
7912040	NM_148965	TNFRSF25	tumor necrosis factor receptor superfamily, member 25	1p36.2	6.85212	6.72698	6.62723	6.72233	-1.02	0.289967
7912056	NM_198681	PLEKHG5	pleckstrin homology domain containing, family G (with RhoGef domain) member 5	1p36.31	6.31714	5.94571	6.10258	6.3797	1.02	0.685813
7912086	NM_024654	NOL9	nucleolar protein 9	1p36.31	6.87756	7.09872	7.42657	7.24751	1.05	0.13911
7912102	NM_014851	KLHL21	kelch-like 21 (Drosophila)	1p36.31	4.90852	4.7439	5.02433	5.1115	1.05	0.159758
7912112	NM_018198	DNAJC11	DnaJ (Hsp40) homolog, subfamily C, member 11	1p36.31	6.762	6.66309	7.43789	7.23516	1.09	0.060218
7912133	ENST00000439923	LOC100129476	hypothetical protein LOC100129476	1p36.31	3.18322	3.35675	3.36783	3.32224	1.02	0.54235
7912136	NM_021995	UTS2	urotensin 2	1p36	3.14417	3.41093	3.91527	3.73801	1.17	0.091609
7912145	NM_001561	TNFRSF9	tumor necrosis factor receptor superfamily, member 9	1p36	3.36199	3.02971	3.59731	4.1077	1.21	0.184241
7912157	NM_018948	ERRFI1	ERBB receptor feedback inhibitor 1	1p36	10.527	10.3601	9.88535	10.2272	-1.04	0.224602
7912166	NM_012102	RERE	arginine-glutamic acid dipeptide (RE) repeats	1p36.2-p36.1	6.62834	6.65112	6.56059	6.53781	-1.01	0.030232
7912198	NM_001428	ENO1	enolase 1, (alpha)	1p36.3-p36.2	11.9038	11.8752	12.0673	12.0551	1.01	0.027409
7912211	NM_207420	SLC2A7	solute carrier family 2 (facilitated glucose transporter), member 7	1p36.2	2.96675	3.04532	3.03681	2.93916	-1.01	0.801549
7912224	NM_003039	SLC2A5	solute carrier family 2 (facilitated glucose/fructose transporter), member 5	1p36.2	3.74407	3.74044	3.85636	3.91622	1.04	0.129329
7912239	NM_024980	GPR157	G protein-coupled receptor 157	1p36.23	6.16462	6.12328	6.18855	6.20439	1.01	0.20682
7912248	NR_029610	MIR34A	microRNA 34a	1p36.22|1p36.22	1.86275	2.29255	1.86783	1.87998	-1.11	0.516883
7912250	EF592573	MIR34A	microRNA 34a	1p36.22|1p36.22	6.80989	6.65334	6.91056	7.07384	1.04	0.147963
7912254	NR_027045	C1orf200	chromosome 1 open reading frame 200	1p36.22	3.73005	3.64931	3.94768	4.05204	1.08	0.047612
7912257	NM_001009566	CLSTN1	calsyntenin 1	1p36.22	8.35774	8.41685	8.51384	8.53365	1.02	0.108248
7912280	AK131225	FLJ16126	hypothetical LOC645010	1p36.22	3.158	3.2758	3.0875	3.07523	-1.04	0.25799
7912283	NM_020248	CTNNBIP1	catenin, beta interacting protein 1	1p36.22	6.94865	7.12168	6.98887	6.85833	-1.02	0.418361
7912292	NM_032368	LZIC	leucine zipper and CTNNBIP1 domain containing	1p36.22	6.14908	6.07621	6.0706	5.88285	-1.02	0.365806
7912303	NM_213566	DFFA	DNA fragmentation factor, 45kDa, alpha polypeptide	1p36.3-p36.2	7.19109	7.13487	7.24667	7.13877	1	0.686607
7912316	NM_001079843	CASZ1	castor zinc finger 1	1p36.22	5.41479	5.3706	5.1642	5.26817	-1.03	0.142773
7912343	NM_001079843	CASZ1	castor zinc finger 1	1p36.22	5.62554	5.20279	5.18256	5.41464	-1.02	0.690586
7912347	NM_001079843	CASZ1	castor zinc finger 1	1p36.22	5.48412	5.20314	5.27297	5.20808	-1.02	0.595229
7912349	NM_001170754	C1orf127	chromosome 1 open reading frame 127	1p36.22	4.20805	4.00458	4.13363	4.336	1.03	0.465006
7912361	NM_006610	MASP2	mannan-binding lectin serine peptidase 2	1p36.3-p36.2	3.67275	3.61932	3.3313	3.27999	-1.1	0.011694
7912374	NM_003132	SRM	spermidine synthase	1p36-p22	8.75173	8.78543	9.36917	9.16348	1.06	0.121991
7912385	NM_001001998	EXOSC10	exosome component 10	1p36.22	7.22998	7.56389	7.88039	7.5537	1.04	0.304134
7912412	NM_004958	MTOR	mechanistic target of rapamycin (serine/threonine kinase)	1p36.2	7.23317	7.11629	7.16653	7.25001	1	0.690624
7912473	NM_012168	FBXO2	F-box protein 2	1p36.22	8.72925	8.58582	8.71673	8.73769	1.01	0.507261
7912481	NM_001127325	MAD2L2	MAD2 mitotic arrest deficient-like 2 (yeast)	1p36	8.42797	8.23569	8.15261	8.35703	-1.01	0.638403
7912496	NM_005957	MTHFR	methylenetetrahydrofolate reductase (NAD(P)H)	1p36.3	5.51724	5.11897	4.71262	5.15173	-1.08	0.323719
7912511	NM_138346	KIAA2013	KIAA2013	1p36.22	5.55451	5.63412	5.59931	5.64786	1.01	0.605667
7912515	NM_006172	NPPA	natriuretic peptide precursor A	1p36.21	2.73083	2.82134	2.73477	2.67826	-1.03	0.342703
7912520	NM_002521	NPPB	natriuretic peptide precursor B	1p36.2	3.85124	4.08144	4.13249	3.94815	1.02	0.667731
7912537	NM_004753	DHRS3	dehydrogenase/reductase (SDR family) member 3	1p36.1	5.93956	5.97077	6.62349	6.31922	1.09	0.17926
7912547	NM_001146344	PRAMEF11	PRAME family member 11	1p36.21	2.16896	2.26667	2.02528	1.99577	-1.1	0.123741
7912552	NM_001013631	HNRNPCL1	heterogeneous nuclear ribonucleoprotein C-like 1	1p36.21	2.56363	2.78626	2.89841	2.86806	1.08	0.308025
7912555	NM_001009611	PRAMEF4	PRAME family member 4	1p36.21	2.35231	2.47588	2.32828	2.27617	-1.05	0.293172
7912561	NM_001039361 // NM_001039361 // NM_001039361	PRAMEF10 // PRAMEF10 // PRAMEF10	PRAME family member 10 // PRAME family member 10 // PRAME family member 10	1p36.21 // 1p36.21 // 1p36.21	3.00293	3.11474	2.98695	2.90402	-1.04	0.25515
7912567	NM_001013407	PRAMEF5	PRAME family member 5	1p36.21	2.24242	2.50502	2.33109	2.30018	-1.03	0.734896
7912575	NM_001013407	PRAMEF5	PRAME family member 5	1p36.21	2.26244	2.52585	2.32843	2.2938	-1.04	0.641524
7912580	NM_001136561	LOC440563	heterogeneous nuclear ribonucleoprotein C-like	1p36.21	3.05561	3.03076	2.96847	2.88356	-1.04	0.199565
7912582	NM_001098376	PRAMEF15	PRAME family member 15	1p36.21	2.38571	2.38569	2.22531	2.32119	-1.05	0.256551
7912585	NM_001013692	PRAMEF3	PRAME family member 3	1p36.21	3.67841	3.90791	3.90859	3.66262	-1	0.968275
7912591	NM_001012277	PRAMEF7	PRAME family member 7	1p36.21	4.52294	4.50052	4.50206	4.48049	-1	0.319101
7912595	NM_001024661	PRAMEF13	PRAME family member 13	1p36.21	1.97663	2.18849	2.11469	2.00433	-1.01	0.869739
7912601	NM_001099850	PRAMEF18	PRAME family member 18	1p36.21	3.19291	3.17762	3.59966	3.3534	1.09	0.253527
7912606	NM_001012277	PRAMEF7	PRAME family member 7	1p36.21	4.52294	4.50052	4.50206	4.48049	-1	0.319101
7912610	NM_001024661	PRAMEF13	PRAME family member 13	1p36.21	1.97663	2.18849	2.11469	2.00433	-1.01	0.869739
7912617	NM_001099850	PRAMEF18	PRAME family member 18	1p36.21	3.19291	3.17762	3.59966	3.3534	1.09	0.253527
7912622	ENST00000376085	LRRC38	leucine rich repeat containing 38	1p36.21	3.2961	3.16578	3.1126	3.3079	-1.01	0.878406
7912629	NM_201628	KAZ	kazrin	1p36.21	3.75521	3.94308	4.08985	3.93386	1.04	0.317954
7912638	NR_027136	C1orf126	chromosome 1 open reading frame 126	1p36.21	4.0181	3.86357	3.84468	3.80396	-1.03	0.361064
7912646	NM_001229	CASP9	caspase 9, apoptosis-related cysteine peptidase	1p36.3-p36.1	6.13688	5.99693	5.71284	5.97334	-1.04	0.303947
7912659	NM_024758	AGMAT	agmatine ureohydrolase (agmatinase)	1p36.21	3.796	4.00723	3.7519	3.64501	-1.05	0.269731
7912670	NM_006004	UQCRH	ubiquinol-cytochrome c reductase hinge protein	1p34.1	9.2242	9.16175	8.95493	8.98738	-1.02	0.046494
7912672	NR_024279	FLJ37453	hypothetical LOC729614	1p36.21	4.02264	3.84669	3.65407	3.92516	-1.04	0.477277
7912675	NM_003443	ZBTB17	zinc finger and BTB domain containing 17	1p36.2-p36.1	5.99118	5.93166	5.88799	5.97639	-1	0.645072
7912692	NM_014424	HSPB7	heat shock 27kDa protein family, member 7 (cardiovascular)	1p36.23-p34.3	3.61459	3.53569	3.61557	3.72125	1.03	0.302082
7912701	NM_182623	FAM131C	family with sequence similarity 131, member C	1p36.13	6.58572	6.41969	6.46136	6.6582	1.01	0.701956
7912706	NM_004431	EPHA2	EPH receptor A2	1p36	8.59973	8.23206	8.09916	8.39679	-1.02	0.554106
7912724	NM_153213	ARHGEF19	Rho guanine nucleotide exchange factor (GEF) 19	1p36.13	6.66189	6.59294	6.63966	6.63459	1	0.825296
7912743	NM_030907	C1orf89	chromosome 1 open reading frame 89	1p36.13	5.51728	5.37295	5.47898	5.64779	1.02	0.40073
7912750	NM_018994	FBXO42	F-box protein 42	1p36.23-p36.11	6.46163	6.32421	6.72261	6.85679	1.06	0.05394
7912764	NM_198546	SPATA21	spermatogenesis associated 21	1p36.13	3.67741	3.92413	4.10779	4.03646	1.07	0.252364
7912784	NR_023386	CROCCL2	ciliary rootlet coiled-coil, rootletin-like 2	1p36.13	4.67883	4.79043	4.47126	4.48626	-1.06	0.131358
7912800	NR_004430	RNU1-1	RNA, U1 small nuclear 1	1p36.1	10.3289	10.3935	10.0197	10.2969	-1.02	0.372363
7912802	BC036435	LOC100132147	hypothetical LOC100132147	1p36.13	3.6159	3.92932	3.63237	3.36547	-1.08	0.317827
7912804	BC036435	LOC100132147	hypothetical LOC100132147	1p36.13	6.75031	6.5661	6.72368	6.91272	1.02	0.34924
7912808	NM_001039703	NBPF10	neuroblastoma breakpoint family, member 10	1q21.1	8.25236	8.05163	7.94227	8.06299	-1.02	0.353345
7912839	NR_026752	CROCCL1	ciliary rootlet coiled-coil, rootletin-like 1	1p36.13	5.91229	5.88174	5.59188	5.67933	-1.05	0.078072
7912850	NR_004430	RNU1-1	RNA, U1 small nuclear 1	1p36.1	10.3289	10.3935	10.0197	10.2969	-1.02	0.372363
7912852	NM_001412	EIF1AX	eukaryotic translation initiation factor 1A, X-linked	Xp22.12	8.32027	8.46793	8.95402	8.7369	1.05	0.089608
7912854	NR_026567	ESPNP	espin pseudogene	1p36.13	5.54299	5.75484	5.80751	5.83356	1.03	0.348847
7912863	NR_002729	MST1P9	macrophage stimulating 1 (hepatocyte growth factor-like) pseudogene 9	1p36.13	5.50242	5.4606	5.39696	5.43653	-1.01	0.153782
7912884	BC126340 // BC126340	LOC100132147 // LOC100132147	hypothetical LOC100132147 // hypothetical LOC100132147	1p36.13 // 1p36.13	3.81048	4.16521	4.02015	3.62935	-1.04	0.600068
7912887	NM_002403	MFAP2	microfibrillar-associated protein 2	1p36.1-p35	7.68401	7.84119	8.13834	7.84649	1.03	0.332902
7912898	NM_022089	ATP13A2	ATPase type 13A2	1p36	7.55065	7.44955	7.70193	7.8284	1.04	0.087292
7912928	NM_003000	SDHB	succinate dehydrogenase complex, subunit B, iron sulfur (Ip)	1p36.1-p35	8.48672	8.32782	8.04205	8.23362	-1.03	0.167116
7912937	NM_007365	PADI2	peptidyl arginine deiminase, type II	1p36.13	6.21609	5.87238	5.27212	5.7215	-1.1	0.201253
7912956	NM_001136204	RCC2	regulator of chromosome condensation 2	1p36.13	8.0975	8.2481	8.35448	8.22884	1.01	0.3526
7912968	NM_152232	TAS1R2	taste receptor, type 1, member 2	1p36.13	3.82134	4.05326	4.10845	4.0263	1.03	0.453116
7912975	NM_003748	ALDH4A1	aldehyde dehydrogenase 4 family, member A1	1p36	5.62723	5.55482	5.78349	5.85757	1.04	0.047391
7912994	NM_001136265	IFFO2	intermediate filament family orphan 2	1p36.13	6.15551	6.0304	5.69625	5.93466	-1.05	0.214938
7913001	NM_020765	UBR4	ubiquitin protein ligase E3 component n-recognin 4	1p36.13	8.20509	7.99288	8.02706	8.24851	1	0.823939
7913110	BC034589	KIAA0090	KIAA0090	1p36.13	7.76319	7.77173	7.87565	7.84994	1.01	0.061952
7913138	NM_201252	AKR7L	aldo-keto reductase family 7-like	1p36.13|1p35-p36.1	3.01341	2.92154	3.00773	2.988	1.01	0.626966
7913146	NM_012067	AKR7A3	aldo-keto reductase family 7, member A3 (aflatoxin aldehyde reductase)	1p36.13	5.67078	5.59295	5.63118	5.66976	1	0.722924
7913156	NM_003689	AKR7A2	aldo-keto reductase family 7, member A2 (aflatoxin aldehyde reductase)	1p36.13	7.80909	7.80423	7.64261	7.69985	-1.02	0.130424
7913169	NM_004930	CAPZB	capping protein (actin filament) muscle Z-line, beta	1p36.1	9.13646	9.13678	9.48893	9.54089	1.04	0.043645
7913187	NM_181719	TMCO4	transmembrane and coiled-coil domains 4	1p36.13	4.61262	4.8152	5.03053	4.79681	1.04	0.3278
7913206	NM_019062	RNF186	ring finger protein 186	1p36.13	4.40801	4.42999	4.85944	4.7068	1.08	0.12548
7913211	NM_014589	PLA2G2E	phospholipase A2, group IIE	1p36.13	4.29064	4.26761	4.18473	4.4654	1.01	0.798673
7913216	NM_000300	PLA2G2A	phospholipase A2, group IIA (platelets, synovial fluid)	1p35	4.28501	3.95194	3.98375	4.27352	1	0.967523
7913226	NM_012400	PLA2G2D	phospholipase A2, group IID	1p36.12	4.65137	4.85871	4.7739	4.79879	1.01	0.813463
7913235	NM_001105572	PLA2G2C	phospholipase A2, group IIC	1p36.12	4.95591	4.84796	5.10503	5.16883	1.05	0.088009
7913237	NM_018584	CAMK2N1	calcium/calmodulin-dependent protein kinase II inhibitor 1	1p36.12	8.55784	8.26426	8.06306	8.53941	-1.01	0.739144
7913242	NM_024544	MUL1	mitochondrial E3 ubiquitin ligase 1	1p36.12	6.88748	6.68419	6.79602	6.98661	1.02	0.528337
7913249	NM_032409	PINK1	PTEN induced putative kinase 1	1p36	4.77327	5.13345	5.42756	5.33087	1.09	0.236994
7913252	NM_032409	PINK1	PTEN induced putative kinase 1	1p36	5.42891	5.76632	5.9651	5.80249	1.05	0.309836
7913256	NM_005216	DDOST	dolichyl-diphosphooligosaccharide--protein glycosyltransferase	1p36.1	8.92998	8.81241	8.78611	8.92977	-1	0.899977
7913271	NM_020816	KIF17	kinesin family member 17	1p36.12	4.50531	4.59324	4.12908	4.26101	-1.08	0.059683
7913290	NM_001103161	SH2D5	SH2 domain containing 5	1p36.12	4.84839	4.69856	4.5704	4.75295	-1.02	0.446903
7913300	NM_016287	HP1BP3	heterochromatin protein 1, binding protein 3	1p36.12	8.09687	8.2237	8.37957	8.18402	1.01	0.421723
7913319	NM_003760	EIF4G3	eukaryotic translation initiation factor 4 gamma, 3	1p36.12	7.08493	6.83375	6.74636	6.85771	-1.02	0.413005
7913357	NM_001397	ECE1	endothelin converting enzyme 1	1p36.1	8.16091	8.10448	8.13025	8.29774	1.01	0.50269
7913380	NM_032264	NBPF3	neuroblastoma breakpoint family, member 3	1p36.12	10.0824	9.87022	9.82795	9.96972	-1.01	0.613193
7913385	NM_001145657	RAP1GAP	RAP1 GTPase activating protein	1p36.1-p35	5.90472	5.59524	5.20674	5.45022	-1.08	0.172632
7913415	NM_032236	USP48	ubiquitin specific peptidase 48	1p36.12	6.65027	6.5012	6.49633	6.64769	-1	0.975224
7913450	NM_005529	HSPG2	heparan sulfate proteoglycan 2	1p36.1-p34	7.43396	7.1522	7.08189	7.40586	-1.01	0.840385
7913547	NM_030761	WNT4	wingless-type MMTV integration site family, member 4	1p36.23-p35.1	5.51107	5.26235	5.16861	5.37876	-1.02	0.561087
7913558	NM_033631	LUZP1	leucine zipper protein 1	1p36	6.88376	6.78354	6.78419	6.89472	1	0.945122
7913566	NM_000864	HTR1D	5-hydroxytryptamine (serotonin) receptor 1D	1p36.3-p34.3	5.77312	6.01919	6.78282	6.40144	1.12	0.111209
7913571	NM_001102398	HNRNPR	heterogeneous nuclear ribonucleoprotein R	1p36.12	8.2914	8.28769	8.62157	8.53904	1.04	0.089199
7913582	NM_001077195	ZNF436	zinc finger protein 436	1p36	5.45634	5.66337	5.63577	5.52956	1	0.86791
7913593	NM_003196	TCEA3	transcription elongation factor A (SII), 3	1p36.12	4.7233	4.66641	4.69446	4.61372	-1.01	0.504237
7913609	NM_017707	ASAP3	ArfGAP with SH3 domain, ankyrin repeat and PH domain 3	1p36.12	5.82517	5.59305	5.35754	5.55733	-1.05	0.244716
7913644	NM_004091	E2F2	E2F transcription factor 2	1p36	5.02454	4.93988	5.28969	5.16997	1.05	0.089567
7913655	NM_002167	ID3	inhibitor of DNA binding 3, dominant negative helix-loop-helix protein	1p36.13-p36.12	7.4938	7.45301	7.50651	7.69772	1.02	0.399692
7913667	NM_000403	GALE	UDP-galactose-4-epimerase	1p36-p35	6.60438	6.56285	6.72544	6.5724	1.01	0.546622
7913682	NM_000191	HMGCL	3-hydroxymethyl-3-methylglutaryl-CoA lyase	1p36.1-p35	6.69057	6.42019	6.31145	6.33751	-1.04	0.335117
7913694	NM_000147	FUCA1	fucosidase, alpha-L- 1, tissue	1p34	7.80824	7.70374	7.59368	7.7751	-1.01	0.579549
7913705	NM_001841	CNR2	cannabinoid receptor 2 (macrophage)	1p36.11	3.54108	3.18694	3.34427	3.54269	1.02	0.741929
7913712	NM_006625	SFRS13A	splicing factor, arginine/serine-rich 13A	1p36.11	6.16762	6.35088	6.39646	6.02943	-1.01	0.848764
7913727	NM_152372	MYOM3	myomesin family, member 3	1p36.11	4.84377	5.01609	4.84269	4.702	-1.03	0.296872
7913768	NM_021258	IL22RA1	interleukin 22 receptor, alpha 1	1p36.11	4.55911	4.748	4.79681	4.72245	1.02	0.451743
7913776	NM_170743	IL28RA	interleukin 28 receptor, alpha (interferon, lambda receptor)	1p36.11	5.40495	5.05332	5.0899	5.58272	1.02	0.760264
7913787	BC063891	C1orf201	chromosome 1 open reading frame 201	1p36.11	6.07764	5.90376	5.75094	6.06901	-1.01	0.710372
7913805	NM_001031680	RUNX3	runt-related transcription factor 3	1p36	7.13865	7.25561	6.88988	6.84655	-1.05	0.08147
7913814	NM_015484	SYF2	SYF2 homolog, RNA splicing factor (S. cerevisiae)	1p36.11	5.76334	5.8294	5.79536	5.69074	-1.01	0.493686
7913824	NM_020317	C1orf63	chromosome 1 open reading frame 63	1p36.13-p35.1	5.34212	5.45486	5.41715	5.28896	-1.01	0.648502
7913835	NM_020485	RHCE	Rh blood group, CcEe antigens	1p36.11	3.20915	2.81847	2.86174	3.42585	1.04	0.74515
7913850	NM_019557	FAM54B	family with sequence similarity 54, member B	1p36.11	4.99588	4.99352	5.02334	5.11907	1.02	0.35576
7913852	NM_024037	C1orf135	chromosome 1 open reading frame 135	1p36.11	4.62292	4.5545	5.0716	5.03212	1.1	0.015328
7913858	NM_178422	PAQR7	progestin and adipoQ receptor family member VII	1p36.11	4.70351	4.81312	5.07759	4.72652	1.03	0.559676
7913864	NM_001145454	STMN1	stathmin 1	1p36.1-p35	3.61877	3.63818	3.60731	3.57547	-1.01	0.210994
7913869	NM_203401	STMN1	stathmin 1	1p36.1-p35	8.17296	8.45011	8.42821	8.16453	-1	0.944013
7913883	NM_000437	PAFAH2	platelet-activating factor acetylhydrolase 2, 40kDa	1p36	5.93155	5.93321	5.87764	5.82532	-1.01	0.198777
7913896	NM_001004434	SLC30A2	solute carrier family 30 (zinc transporter), member 2	1p35.3	3.64131	3.53053	3.59781	3.89077	1.04	0.465179
7913907	NM_032588	TRIM63	tripartite motif-containing 63	1p34-p33	2.45392	2.59145	2.47365	2.30726	-1.06	0.348987
7913918	NM_183008	UBXN11	UBX domain protein 11	1p36.11	4.89781	4.92522	5.11413	5.10965	1.04	0.038617
7913938	NM_001039775	AIM1L	absent in melanoma 1-like	1p36.11	5.23	5.19706	5.28768	5.34508	1.02	0.118498
7913965	NM_001114759	ZNF683	zinc finger protein 683	1p36.11	3.82545	4.0664	3.92947	3.7788	-1.02	0.595292
7913978	NM_018066	GPN2	GPN-loop GTPase 2	1p36.11	6.52547	6.42823	6.28318	6.44001	-1.02	0.358504
7913990	NM_022078	GPATCH3	G patch domain containing 3	1p35.3-p35.1	4.62369	4.33738	4.92555	4.95912	1.1	0.18723
7914000	NM_021969	NR0B2	nuclear receptor subfamily 0, group B, member 2	1p36.1	3.4681	3.67038	3.61772	3.67449	1.02	0.583918
7914003	NM_152365	C1orf172	chromosome 1 open reading frame 172	1p36.11	6.44149	6.24086	6.42025	6.54032	1.02	0.378519
7914015	NM_052943	FAM46B	family with sequence similarity 46, member B	1p36.11	6.25017	6.30645	6.20244	6.49631	1.01	0.71332
7914021	NM_003047	SLC9A1	solute carrier family 9 (sodium/hydrogen exchanger), member 1	1p36.1-p35	6.2085	6.19768	6.28421	6.43391	1.03	0.283461
7914042	NM_004672	MAP3K6	mitogen-activated protein kinase kinase kinase 6	1p36.11	6.40001	6.4085	6.27516	6.11169	-1.03	0.23465
7914075	NM_003665	FCN3	ficolin (collagen/fibrinogen domain containing) 3 (Hakata antigen)	1p36.11	4.27614	4.40386	4.20841	4.25121	-1.03	0.31455
7914084	NM_207397	CD164L2	CD164 sialomucin-like 2	1p36.11	5.85762	5.92585	5.71015	5.77998	-1.03	0.095268
7914094	NM_006990	WASF2	WAS protein family, member 2	1p36.11-p34.3	6.95928	7.07654	6.87304	7.02583	-1.01	0.555061
7914103	NM_001029882	AHDC1	AT hook, DNA binding motif, containing 1	1p36.13	6.36641	6.1222	6.1062	6.42218	1	0.930268
7914112	NM_005248	FGR	Gardner-Rasheed feline sarcoma viral (v-fgr) oncogene homolog	1p36.2-p36.1	5.16394	5.15484	5.22567	5.16846	1.01	0.409455
7914127	NM_002038	IFI6	interferon, alpha-inducible protein 6	1p35	7.89382	7.52694	7.51379	7.82381	-1.01	0.878876
7914139	NM_014110	PPP1R8	protein phosphatase 1, regulatory (inhibitor) subunit 8	1p35	2.40763	2.23054	2.52971	2.58806	1.1	0.199033
7914141	NM_002946	RPA2	replication protein A2, 32kDa	1p35	5.83702	5.89163	6.1085	5.96781	1.03	0.212685
7914153	NM_001990	EYA3	eyes absent homolog 3 (Drosophila)	1p36	6.394	6.34656	5.85679	6.23379	-1.05	0.331072
7914180	NM_014752	SPCS2	signal peptidase complex subunit 2 homolog (S. cerevisiae)	11q13.4	7.02158	7.35008	7.54808	7.40537	1.04	0.298978
7914184	NM_001164721	PTAFR	platelet-activating factor receptor	1p35-p34.3	5.36233	5.21926	5.08536	5.32948	-1.02	0.627451
7914194	NM_014280	DNAJC8	DnaJ (Hsp40) homolog, subfamily C, member 8	1p35.3	7.10946	7.19743	7.36432	7.17709	1.02	0.412728
7914202	AY277594	SNHG12	small nucleolar RNA host gene 12 (non-protein coding)	1p35.3	8.30232	8.13605	7.65098	7.93743	-1.05	0.153902
7914212	NR_002987	SNORA61	small nucleolar RNA, H/ACA box 61	1p35.3	8.7255	8.54624	8.18707	8.60064	-1.03	0.436831
7914214	NR_002976	SNORA44	small nucleolar RNA, H/ACA box 44	1p35.3	6.08257	6.22582	5.55544	5.65882	-1.1	0.031382
7914216	NR_003035	SNORA16A	small nucleolar RNA, H/ACA box 16A	1p35.3	7.08328	6.8921	6.19687	6.70849	-1.08	0.256413
7914218	NM_001135218	TAF12	TAF12 RNA polymerase II, TATA box binding protein (TBP)-associated factor, 20kDa	1p35.3	6.50648	6.4903	6.26238	6.33117	-1.03	0.093228
7914232	NM_001003682	TMEM200B	transmembrane protein 200B	1p35	6.78213	6.7012	6.69099	6.6609	-1.01	0.330067
7914235	NM_005626	SFRS4	splicing factor, arginine/serine-rich 4	1p35.3	8.21733	8.21147	7.74923	7.7833	-1.06	0.020495
7914245	NM_001024732	MECR	mitochondrial trans-2-enoyl-CoA reductase	1p36.1-p35.1	7.01504	6.92279	6.83887	6.92249	-1.01	0.293207
7914260	NM_002379	MATN1	matrilin 1, cartilage matrix protein	1p35	3.40554	3.33668	3.47272	3.56333	1.04	0.13172
7914270	NM_006762	LAPTM5	lysosomal protein transmembrane 5	1p34	4.06089	3.86082	3.9792	4.18821	1.03	0.485354
7914282	NM_014654	SDC3	syndecan 3	1pter-p22.3	6.73252	6.67472	6.46533	6.61265	-1.03	0.23703
7914296	NM_001020658	PUM1	pumilio homolog 1 (Drosophila)	1p35.2	8.35512	8.27796	8.30144	8.36576	1	0.767388
7914322	NR_004054	SNORD103A	small nucleolar RNA, C/D box 103A	1p35.2	3.30373	2.96768	2.87029	2.96469	-1.07	0.407362
7914324	NR_004054	SNORD103A	small nucleolar RNA, C/D box 103A	1p35.2	3.30373	2.96768	2.87029	2.96469	-1.07	0.407362
7914326	NM_024522	NKAIN1	Na+/K+ transporting ATPase interacting 1	1p35.2	5.27752	5.16271	5.01414	5.03814	-1.04	0.1707
7914334	NM_004814	SNRNP40	small nuclear ribonucleoprotein 40kDa (U5)	1p35.2	6.96331	7.09741	7.41391	7.17623	1.04	0.224754
7914342	NM_004102	FABP3	fatty acid binding protein 3, muscle and heart (mammary-derived growth inhibitor)	1p33-p32	2.93905	2.51049	2.51524	3.02166	1.02	0.907577
7914350	NM_178865	SERINC2	serine incorporator 2	1p35.1	4.51548	4.76182	4.98867	4.60198	1.03	0.575594
7914354	NM_012392	PEF1	penta-EF-hand domain containing 1	1p34	6.14064	6.10795	6.37468	6.36899	1.04	0.036643
7914361	NM_001856	COL16A1	collagen, type XVI, alpha 1	1p35-p34	5.47342	5.64306	5.57763	5.47044	-1.01	0.770833
7914433	NM_001703	BAI2	brain-specific angiogenesis inhibitor 2	1p35	6.84298	6.59259	6.14791	6.48759	-1.06	0.209414
7914467	NM_144569	SPOCD1	SPOC domain containing 1	1p35.2	4.71141	4.62453	4.59251	4.70185	-1	0.795207
7914489	NM_080391	PTP4A2	protein tyrosine phosphatase type IVA, member 2	1p35	9.60726	9.51508	9.18583	9.34505	-1.03	0.112178
7914500	AF258548	C1orf91	chromosome 1 open reading frame 91	1p36.11-p34.2	4.9867	4.95506	4.96574	5.01966	1	0.571865
7914516	NR_026850	MTMR9L	myotubularin related protein 9-like, pseudogene	1p35.1	5.46126	5.47524	5.408	5.45852	-1.01	0.386841
7914525	NM_023009	MARCKSL1	MARCKS-like 1	1p35.1	9.13986	9.16999	9.14332	9.20366	1	0.653935
7914530	NM_001143888	BSDC1	BSD domain containing 1	1p35.1	6.4661	6.49828	6.50705	6.78682	1.03	0.446351
7914550	NM_178547	ZBTB8OS	zinc finger and BTB domain containing 8 opposite strand	1p35.1	4.48444	4.60986	4.82924	4.50048	1.03	0.603258
7914557	NM_030786	SYNC	syncoilin, intermediate filament protein	1p34.3-p33	4.67463	4.66805	5.24366	4.96356	1.09	0.199294
7914563	NM_003680	YARS	tyrosyl-tRNA synthetase	1p35.1	8.26276	7.99591	8.24638	8.42684	1.03	0.341821
7914580	NM_001171941	FNDC5	fibronectin type III domain containing 5	1p35.1	3.25024	3.37797	3.30383	3.1509	-1.03	0.478238
7914592	NM_033504	TMEM54	transmembrane protein 54	1p35-p34	9.01524	8.85183	8.77603	8.9461	-1.01	0.601537
7914603	NM_153341	RNF19B	ring finger protein 19B	1p35.1	7.11505	7.01789	7.49898	7.5396	1.06	0.03912
7914617	NM_013411	AK2	adenylate kinase 2	1p34	6.15482	6.17634	6.50568	6.17901	1.03	0.474349
7914630	NM_018207	TRIM62	tripartite motif-containing 62	1p35.1	5.89491	6.01144	5.98894	5.8822	-1	0.844491
7914643	ENST00000442999	A3GALT2	alpha 1,3-galactosyltransferase 2	1p35.1	3.34763	2.92239	3.00284	3.38664	1.02	0.854298
7914648	NM_198040	PHC2	polyhomeotic homolog 2 (Drosophila)	1p34.3	7.10353	6.93546	7.10791	7.05691	1.01	0.588611
7914667	NM_052896	CSMD2	CUB and Sushi multiple domains 2	1p35.1-p34.3	3.31346	3.29872	3.25286	3.23445	-1.02	0.037386
7914750	NM_138428	C1orf212	chromosome 1 open reading frame 212	1p34.3	5.20019	5.03569	5.14889	5.10888	1	0.916406
7914758	NM_001080418	DLGAP3	discs, large (Drosophila) homolog-associated protein 3	1p35.3-p34.1	3.90967	3.74847	3.95714	3.98588	1.04	0.320819
7914764	NM_007167	ZMYM6	zinc finger, MYM-type 6	1p34.2	5.45979	5.59477	5.65995	5.58715	1.02	0.367055
7914791	NM_005066	SFPQ	splicing factor proline/glutamine-rich	1p34.3	7.67828	7.96838	8.71543	8.08694	1.07	0.285802
7914809	NM_024874	KIAA0319L	KIAA0319-like	1p34.2	7.21461	7.18033	7.21824	7.27268	1.01	0.295773
7914834	NM_002794	PSMB2	proteasome (prosome, macropain) subunit, beta type, 2	1p34.2	9.34263	9.3707	9.98808	9.81485	1.06	0.093301
7914847	BC026909	C1orf216	chromosome 1 open reading frame 216	1p34.3	4.76755	4.91043	5.21167	5.24459	1.08	0.101476
7914851	NM_022111	CLSPN	claspin homolog (Xenopus laevis)	1p34.2	3.8787	4.36564	4.49942	4.16598	1.05	0.55784
7914878	AY605064	LOC100289612	arsenic transactivated protein 1	1p34.3	5.14229	5.38734	6.02216	5.46907	1.09	0.304123
7914880	NM_005202	COL8A2	collagen, type VIII, alpha 2	1p34.2	4.74852	4.76884	5.04157	5.02757	1.06	0.003501
7914887	NM_014408	TRAPPC3	trafficking protein particle complex 3	1p34.3	7.9207	7.84804	7.97608	7.98822	1.01	0.218619
7914898	ENST00000312808	C1orf113	chromosome 1 open reading frame 113	1p34.3	6.95047	6.84202	7.04438	7.06636	1.02	0.197538
7914904	NM_032017	STK40	serine/threonine kinase 40	1p34.3	5.98857	5.87419	5.56334	6.0674	-1.02	0.725755
7914917	NM_032881	LSM10	LSM10, U7 small nuclear RNA associated	1p34.3	6.84881	6.74531	7.00695	7.15889	1.04	0.104851
7914923	NM_145047	OSCP1	organic solute carrier partner 1	1p34.3	4.57105	4.78928	4.61019	4.39367	-1.04	0.36596
7914940	NM_031280	MRPS15	mitochondrial ribosomal protein S15	1p35-p34.1	8.88354	8.926	9.21612	9.19207	1.03	0.014781
7914950	NM_156039	CSF3R	colony stimulating factor 3 receptor (granulocyte)	1p35-p34.3	3.53346	3.44783	3.50712	3.61941	1.02	0.418234
7914974	NM_000831	GRIK3	glutamate receptor, ionotropic, kainate 3	1p34-p33	3.99786	4.09235	3.91504	3.81568	-1.05	0.120199
7914996	NM_022756	MEAF6	MYST/Esa1-associated factor 6	1p35.3-p33	6.96104	7.01109	6.96252	7.08383	1.01	0.652125
7915008	NM_024700	SNIP1	Smad nuclear interacting protein 1	1p34.3	6.43469	6.65803	6.33913	6.30091	-1.04	0.28458
7915015	NM_013285	GNL2	guanine nucleotide binding protein-like 2 (nucleolar)	1p34.3	7.99172	7.85249	8.03704	8.16644	1.02	0.199986
7915032	NM_001038633	RSPO1	R-spondin homolog (Xenopus laevis)	1p34.3	4.73928	4.75289	4.64772	4.60724	-1.03	0.081576
7915045	BC018109	C1orf109	chromosome 1 open reading frame 109	1p34.3	4.48293	4.23421	4.18293	4.44413	-1.01	0.826126
7915056	NM_001099439	EPHA10	EPH receptor A10	1p34.3	4.20565	4.34384	4.3861	4.22949	1.01	0.781999
7915078	NM_173641	EPHA10	EPH receptor A10	1p34.3	4.78961	4.74347	4.77304	4.80819	1.01	0.498965
7915084	NM_024640	YRDC	yrdC domain containing (E. coli)	1p34.3	7.68052	7.49986	7.11911	7.37685	-1.05	0.176303
7915091	NM_005955	MTF1	metal-regulatory transcription factor 1	1p33	6.77116	6.74665	6.69158	6.89338	1	0.795664
7915101	NM_005540	INPP5B	inositol polyphosphate-5-phosphatase, 75kDa	1p34	6.75071	6.54653	6.35317	6.55936	-1.03	0.316083
7915130	NM_006802	SF3A3	splicing factor 3a, subunit 3, 60kDa	1p34.3	7.59574	7.78009	8.10087	7.91691	1.04	0.132618
7915147	NM_004468	FHL3	four and a half LIM domains 3	1p34	7.10611	7.08677	7.19886	7.17709	1.01	0.025213
7915156	NM_002699	POU3F1	POU class 3 homeobox 1	1p34.1	5.72779	5.56547	5.62466	5.67788	1	0.964238
7915160	NM_022157	RRAGC	Ras-related GTP binding C	1p34	6.50561	6.56229	6.57014	6.6306	1.01	0.250648
7915170	NM_012333	MYCBP	c-myc binding protein	1p33-p32.2	6.21941	6.47393	6.3608	6.09874	-1.02	0.587762
7915178	NM_030772	GJA9	gap junction protein, alpha 9, 59kDa	1p34	1.57129	1.72306	1.60711	1.57238	-1.04	0.585629
7915184	NM_017821	RHBDL2	rhomboid, veinlet-like 2 (Drosophila)	1p34.3	1.47621	1.67254	1.44683	1.51996	-1.06	0.518061
7915204	AK093659	PPIEL	peptidylprolyl isomerase E-like (pseudogene)	1p34.3	3.85147	3.84842	3.79651	3.66229	-1.03	0.323262
7915207	NM_001135653	PABPC4	poly(A) binding protein, cytoplasmic 4 (inducible form)	1p32-p36	8.41531	8.53847	8.77769	8.62235	1.03	0.15978
7915227	NR_002983	SNORA55	small nucleolar RNA, H/ACA box 55	1p34.3	5.20427	4.84603	5.075	5.13132	1.02	0.738648
7915229	NM_014571	HEYL	hairy/enhancer-of-split related with YRPW motif-like	1p34.3	5.80822	5.75242	5.69809	5.74552	-1.01	0.254333
7915238	NM_032526	NT5C1A	5'-nucleotidase, cytosolic IA	1p34.3-p33	4.43879	4.24384	4.43277	4.48444	1.03	0.433127
7915245	NM_016257	HPCAL4	hippocalcin like 4	1p34.2	5.40505	5.14765	4.81651	5.16878	-1.06	0.333118
7915252	NM_001720	BMP8B	bone morphogenetic protein 8b	1p35-p32	6.1684	6.09021	5.75869	6.00136	-1.04	0.2665
7915257	NM_022120	OXCT2	3-oxoacid CoA transferase 2	1p34	5.18472	5.08605	5.15067	5.32547	1.02	0.437368
7915261	NM_017646	TRIT1	tRNA isopentenyltransferase 1	1p35.3-p34.1	7.39557	7.27974	7.34683	7.33594	1	0.959107
7915277	NM_005376	MYCL1	v-myc myelocytomatosis viral oncogene homolog 1, lung carcinoma derived (avian)	1p34.2	5.415	5.46593	5.42157	5.38525	-1.01	0.368586
7915286	NM_000310	PPT1	palmitoyl-protein thioesterase 1	1p32	7.53535	7.47114	7.58067	7.63241	1.01	0.134757
7915297	NM_001852	COL9A2	collagen, type IX, alpha 2	1p33-p32	5.46937	5.53503	5.51553	5.44804	-1	0.706841
7915333	NM_014747	RIMS3	regulating synaptic membrane exocytosis 3	1pter-p22.2	6.17449	5.92195	5.6951	6.06696	-1.03	0.543438
7915345	NM_001142588	NFYC	nuclear transcription factor Y, gamma	1p32|1p32	5.32546	5.49955	5.47571	5.34515	-1	0.986644
7915347	NM_133467	CITED4	Cbp/p300-interacting transactivator, with Glu/Asp-rich carboxy-terminal domain, 4	1p34.2|1p35-p34	5.69157	5.39162	5.461	5.61627	-1	0.988052
7915351	NM_001168247	SLFNL1	schlafen-like 1	1p34.2	4.16187	4.0837	4.13431	4.26632	1.02	0.438803
7915363	NM_001031694	SCMH1	sex comb on midleg homolog 1 (Drosophila)	1p34	5.72918	5.70654	5.87391	5.78162	1.02	0.237847
7915385	NM_001956	EDN2	endothelin 2	1p34	4.90114	4.96232	4.82392	4.90453	-1.01	0.32177
7915392	NM_024503	HIVEP3	human immunodeficiency virus type I enhancer binding protein 3	1p34	5.83688	5.53862	5.25659	5.61131	-1.05	0.39053
7915404	NM_033553	GUCA2A	guanylate cyclase activator 2A (guanylin)	1p35-p34	4.12376	4.03635	4.17619	4.26037	1.03	0.15059
7915408	NM_014947	FOXJ3	forkhead box J3	1pter-q31.3	8.25094	8.40125	8.4241	8.47301	1.01	0.332606
7915425	NM_032257	ZMYND12	zinc finger, MYND-type containing 12	1p34.2	2.70641	2.72715	2.67918	2.63043	-1.02	0.201833
7915435	NM_001123395	CLDN19	claudin 19	1p34.2	5.17697	5.24789	5.14803	5.22108	-1.01	0.638983
7915444	NM_022356	LEPRE1	leucine proline-enriched proteoglycan (leprecan) 1	1p34.1	6.69577	6.2485	6.08247	6.42865	-1.03	0.528128
7915468	NM_199342	CCDC23	coiled-coil domain containing 23	1p34.2	4.74402	4.58572	4.18642	4.35878	-1.09	0.079406
7915472	NM_006516	SLC2A1	solute carrier family 2 (facilitated glucose transporter), member 1	1p35-p31.3	8.82796	9.29913	10.1305	9.49252	1.08	0.210755
7915485	NM_006824	EBNA1BP2	EBNA1 binding protein 2	1p35-p33	7.30523	7.35794	7.67442	7.45041	1.03	0.274571
7915498	AK096139	LOC100131756	hypothetical LOC100131756	1p34.2	2.8064	2.87622	2.54685	2.86029	-1.05	0.537909
7915500	NM_182517	C1orf210	chromosome 1 open reading frame 210	1p34.2	6.27851	6.21271	5.53761	5.78901	-1.1	0.117056
7915504	NM_022821	ELOVL1	elongation of very long chain fatty acids (FEN1/Elo2, SUR4/Elo3, yeast)-like 1	1p34.2	7.91309	7.94693	8.29813	8.32951	1.05	0.003683
7915516	NM_201542	MED8	mediator complex subunit 8	1p34.2	7.08926	6.81693	6.69644	6.96367	-1.02	0.585071
7915529	NM_031207	HYI	hydroxypyruvate isomerase homolog (E. coli)	1p34.2	4.83973	4.92211	5.07293	5.01775	1.03	0.095928
7915543	NM_201649	SLC6A9	solute carrier family 6 (neurotransmitter transporter, glycine), member 9	1p33	5.54864	5.99483	6.17277	5.87458	1.04	0.459044
7915567	NM_024066	ERI3	ERI1 exoribonuclease family member 3	1p32	7.89585	7.77913	7.78616	7.84275	-1	0.767362
7915578	NM_024587	TMEM53	transmembrane protein 53	1p34.1	6.44316	6.54448	6.30186	6.31769	-1.03	0.163753
7915590	NR_002753	RNU5F	RNA, U5F small nuclear	1p34.1	1.92053	2.07679	1.79909	1.83737	-1.1	0.24519
7915592	NR_002755 // NR_002755	RNU5D // RNU5D	RNA, U5D small nuclear // RNA, U5D small nuclear	1p34.1 // 1p34.1	7.61966	7.94612	7.64147	7.17181	-1.05	0.332089
7915598	NM_153274	BEST4	bestrophin 4	1p33-p32.3	4.62702	4.27249	4.32126	4.58167	1	0.994559
7915609	NM_001013632	TCTEX1D4	Tctex1 domain containing 4	1p34.1	4.2547	4.045	3.86417	4.35923	-1.01	0.905383
7915612	NM_001166292	PTCH2	patched homolog 2 (Drosophila)	1p33-p34	3.96287	4.36517	3.99943	4.08852	-1.03	0.656982
7915614	NM_003738	PTCH2	patched homolog 2 (Drosophila)	1p33-p34	4.86594	4.81448	4.65479	4.70885	-1.03	0.051503
7915640	NM_020365	EIF2B3	eukaryotic translation initiation factor 2B, subunit 3 gamma, 58kDa	1p34.1	5.35366	5.24237	5.47486	5.60327	1.05	0.107408
7915659	NM_024602	HECTD3	HECT domain containing 3	1p34.1	6.78602	6.73482	6.72924	6.92353	1.01	0.618957
7915682	NM_020883	ZSWIM5	zinc finger, SWIM-type containing 5	1p34.1	4.59978	4.754	4.82614	4.67452	1.02	0.56713
7915695	NM_012222	MUTYH	mutY homolog (E. coli)	1p34.3-p32.1	5.56931	5.51654	5.72372	5.67229	1.03	0.052134
7915718	NM_007170	TESK2	testis-specific kinase 2	1p32	5.87233	5.71433	5.04584	5.48851	-1.1	0.225543
7915733	NM_002574	PRDX1	peroxiredoxin 1	1p34.1	10.2986	10.2316	10.1079	10.1163	-1.02	0.132513
7915743	NM_001114938	CCDC17	coiled-coil domain containing 17	1p34.1	4.61986	4.61879	4.46226	4.45023	-1.04	0.022464
7915758	NM_021639	GPBP1L1	GC-rich promoter binding protein 1-like 1	1p34.1	7.82206	7.72574	7.57562	7.73987	-1.02	0.371008
7915775	NM_005897	IPP	intracisternal A particle-promoted polypeptide	1p34-p32	5.89947	5.98928	5.92432	5.73026	-1.02	0.42587
7915787	NM_003629	PIK3R3	phosphoinositide-3-kinase, regulatory subunit 3 (gamma)	1p34.1	4.21126	3.99324	4.13118	4.10003	1	0.922543
7915801	NM_017739	POMGNT1	protein O-linked mannose beta1,2-N-acetylglucosaminyltransferase	1p34.1	7.35787	7.23286	7.43664	7.36849	1.01	0.304445
7915827	NM_006369	LRRC41	leucine rich repeat containing 41	1p34.1	6.78712	6.7766	7.19349	7.03541	1.05	0.147176
7915841	NM_001097611	KNCN	kinocilin	1p33	5.13705	5.23605	5.50805	5.47173	1.06	0.073715
7915846	NM_003684	MKNK1	MAP kinase interacting serine/threonine kinase 1	1p33	8.22802	7.92127	7.66822	7.8655	-1.04	0.254309
7915861	NM_145279	MOBKL2C	MOB1, Mps One Binder kinase activator-like 2C (yeast)	1p33	4.7912	4.74391	4.80107	4.88004	1.02	0.279759
7915870	NM_022745	ATPAF1	ATP synthase mitochondrial F1 complex assembly factor 1	1p33-p32.3	4.9974	5.36845	5.44065	5.28691	1.03	0.500715
7915882	NM_014774	KIAA0494	KIAA0494	1pter-p22.1	8.30804	7.89887	7.10187	7.78289	-1.09	0.264339
7915896	NR_002788	CYP4Z2P	cytochrome P450, family 4, subfamily Z, polypeptide 2 pseudogene	1p33	1.83792	2.03198	2.18237	1.96826	1.07	0.434617
7915902	NM_000778	CYP4A11	cytochrome P450, family 4, subfamily A, polypeptide 11	1p33	2.91023	3.08956	2.97065	2.63058	-1.07	0.436984
7915910	NM_005764	PDZK1IP1	PDZK1 interacting protein 1	1p33	4.54653	4.49328	4.33038	4.48694	-1.03	0.374636
7915919	NM_003189	TAL1	T-cell acute lymphocytic leukemia 1	1p32	3.87289	3.69205	3.9236	4.12235	1.06	0.216444
7915926	NM_001048166	STIL	SCL/TAL1 interrupting locus	1q32|1p32	6.07978	6.14795	6.07132	6.21255	1	0.765705
7915949	AK090467	LOC284542	hypothetical protein LOC284542	1p33	4.63404	4.36723	4.75398	4.84817	1.07	0.239347
7915951	AF251047	LOC100128922	connexin	1p33	1.3519	1.54475	1.28581	1.18035	-1.17	0.224937
7915955	NM_019073	SPATA6	spermatogenesis associated 6	1p33	5.07554	5.02514	4.62456	4.67377	-1.09	0.007635
7915971	NM_032785	AGBL4	ATP/GTP binding protein-like 4	1p33	2.85994	2.98636	2.84885	2.67111	-1.06	0.28584
7915982	NM_024603	BEND5	BEN domain containing 5	1p33	2.86478	3.0648	2.93189	2.84205	-1.03	0.577933
7915991	NM_032110	DMRTA2	DMRT-like family A2	1p32.3	4.51514	4.58349	4.56164	4.6188	1.01	0.458105
7915995	NM_007051	FAF1	Fas (TNFRSF6) associated factor 1	1p33	7.00853	6.92206	6.96704	7.0703	1.01	0.513327
7916024	NM_001144832	TTC39A	tetratricopeptide repeat domain 39A	1p32.3	5.70942	5.72681	6.0737	5.99283	1.06	0.07023
7916045	NM_001981	EPS15	epidermal growth factor receptor pathway substrate 15	1p32	7.26294	7.28814	7.14699	7.2035	-1.01	0.132634
7916077	NM_002525	NRD1	nardilysin (N-arginine dibasic convertase)	1p32.2-p32.1	8.55883	8.47905	8.59461	8.67535	1.01	0.177589
7916112	NM_002867	RAB3B	RAB3B, member RAS oncogene family	1p32-p31	7.22811	7.26385	7.27721	7.40988	1.01	0.368388
7916120	NM_015913	TXNDC12	thioredoxin domain containing 12 (endoplasmic reticulum)	1p32.3	8.61452	8.61769	8.1767	8.46584	-1.04	0.290192
7916130	NM_138417	KTI12	KTI12 homolog, chromatin associated (S. cerevisiae)	1p32.3	6.68859	6.4824	6.59101	6.61765	1	0.885126
7916135	NM_032449	CC2D1B	coiled-coil and C2 domain containing 1B	1p32.3	5.98968	6.15037	6.14494	5.9915	-1	0.988537
7916167	NM_004153	ORC1L	origin recognition complex, subunit 1-like (yeast)	1p32	5.07391	5.20799	5.95061	5.79102	1.14	0.021371
7916185	NM_001009881	ZCCHC11	zinc finger, CCHC domain containing 11	1p32.3	6.51672	6.4588	6.3828	6.39792	-1.02	0.165457
7916219	NM_023077	C1orf163	chromosome 1 open reading frame 163	1p32.3	6.24119	5.97883	6.66751	6.415	1.07	0.141586
7916229	NM_018281	ECHDC2	enoyl CoA hydratase domain containing 2	1p32.3	5.37872	5.27701	5.1917	5.31666	-1.01	0.460332
7916248	NM_006671	SLC1A7	solute carrier family 1 (glutamate transporter), member 7	1p32.3	3.16772	3.314	3.54547	3.33043	1.06	0.284622
7916262	NM_000098	CPT2	carnitine palmitoyltransferase 2	1p32	7.49919	7.65501	7.78047	7.57451	1.01	0.523417
7916274	NM_002370	MAGOH	mago-nashi homolog, proliferation-associated (Drosophila)	1p34-p33	6.12059	6.02826	6.25017	6.31509	1.03	0.077908
7916282	NM_004631	LRP8	low density lipoprotein receptor-related protein 8, apolipoprotein e receptor	1p34	8.06576	8.05208	7.87395	7.77101	-1.03	0.131238
7916304	NM_147193	GLIS1	GLIS family zinc finger 1	1p32.3	4.95256	4.90604	4.84759	4.99547	-1	0.934247
7916316	NM_018087	TMEM48	transmembrane protein 48	1p32.3	7.43259	7.46305	7.78791	7.73179	1.04	0.022675
7916343	NM_018982	YIPF1	Yip1 domain family, member 1	1p33-p32.1	6.1324	5.94584	6.16754	6.24312	1.03	0.299238
7916356	NM_016126	HSPB11	heat shock protein family B (small), member 11	1p32.1-p33	4.81371	4.78576	5.1311	5.15963	1.07	0.003327
7916364	NM_001010978	LDLRAD1	low density lipoprotein receptor class A domain containing 1	1p32.3	4.57279	4.74158	4.60306	4.35424	-1.04	0.370763
7916372	NM_004872	TMEM59	transmembrane protein 59	1p36-p31	8.65427	8.64306	8.68665	8.74848	1.01	0.260011
7916384	NM_201546	CDCP2	CUB domain containing protein 2	1p32.3	3.90265	3.92191	3.78262	3.75979	-1.04	0.012053
7916393	NM_001031672	CYB5RL	cytochrome b5 reductase-like	1p32.3	4.83506	4.58249	4.40672	4.57406	-1.05	0.303462
7916403	NM_145716	SSBP3	single stranded DNA binding protein 3	1p32.3	7.65421	7.73229	7.68668	7.72185	1	0.829922
7916412	NM_147161	ACOT11	acyl-CoA thioesterase 11	1p32.3	4.71545	4.72102	4.74447	4.7178	1	0.507003
7916422	NM_152268	PARS2	prolyl-tRNA synthetase 2, mitochondrial (putative)	1p32.2	7.15479	7.27756	7.33587	6.98951	-1.01	0.811895
7916425	NM_017904	TTC22	tetratricopeptide repeat domain 22	1p32.3	3.65509	3.62526	3.72309	3.70235	1.02	0.069028
7916432	NM_014762	DHCR24	24-dehydrocholesterol reductase	1p33-p31.1	9.3355	9.60911	9.56648	9.46703	1	0.802791
7916443	NM_015306	USP24	ubiquitin specific peptidase 24	1p32.3	6.02212	5.90476	6.24124	6.18437	1.04	0.100855
7916493	NM_003713	PPAP2B	phosphatidic acid phosphatase type 2B	1pter-p22.1	6.66188	6.7692	6.83132	6.92226	1.02	0.152297
7916506	NM_001004303	C1orf168	chromosome 1 open reading frame 168	1p32.2	1.3284	1.55986	1.76924	1.54313	1.15	0.320309
7916526	NM_000066	C8B	complement component 8, beta polypeptide	1p32	2.26462	2.21953	2.20546	2.20125	-1.02	0.33363
7916541	NM_021080	DAB1	disabled homolog 1 (Drosophila)	1p32-p31	2.82912	3.00927	3.09735	3.0808	1.06	0.308295
7916562	NM_002136	HNRNPA1	heterogeneous nuclear ribonucleoprotein A1	12q13.1	9.70954	9.83812	9.80557	9.57166	-1.01	0.604251
7916566	AF263547	DAB1	disabled homolog 1 (Drosophila)	1p32-p31	1.49442	1.45142	1.31088	1.41168	-1.08	0.235956
7916568	AF263547	DAB1	disabled homolog 1 (Drosophila)	1p32-p31	3.47627	3.507	3.19773	3.3802	-1.06	0.261892
7916570	NM_145243	OMA1	OMA1 homolog, zinc metallopeptidase (S. cerevisiae)	1p32.2-p32.1	6.23214	5.84722	5.76144	5.75821	-1.05	0.383507
7916584	NM_002353	TACSTD2	tumor-associated calcium signal transducer 2	1p32-p31	8.0887	7.50959	6.41393	6.93907	-1.17	0.103978
7916590	NM_001625	AK2	adenylate kinase 2	1p34	9.74415	9.72986	9.76633	9.77847	1	0.066145
7916592	NM_001085487	MYSM1	Myb-like, SWIRM and MPN domains 1	1p32.1	7.31716	6.96267	6.35056	6.87982	-1.08	0.258683
7916609	NM_002228	JUN	jun oncogene	1p32-p31	6.87698	6.43297	6.40055	6.8036	-1.01	0.876345
7916616	NM_000775	CYP2J2	cytochrome P450, family 2, subfamily J, polypeptide 2	1p31.3-p31.2	4.5962	4.42024	4.59151	4.72347	1.03	0.316305
7916629	BC027878	C1orf87	chromosome 1 open reading frame 87	1p32.1	2.74306	2.60047	2.37268	2.54411	-1.09	0.199967
7916643	NM_032027	TM2D1	TM2 domain containing 1	1p31.3	5.08841	4.92042	4.83727	4.8328	-1.04	0.292882
7916654	NM_181712	KANK4	KN motif and ankyrin repeat domains 4	1p31.3	3.80002	3.75853	3.53863	3.72701	-1.04	0.354878
7916669	NM_033407	DOCK7	dedicator of cytokinesis 7	1p31.3	5.93824	6.25687	6.78336	6.46903	1.09	0.142033
7916727	NM_014288	ITGB3BP	integrin beta 3 binding protein (beta3-endonexin)	1p31.3	6.38362	6.43207	6.19195	6.02578	-1.05	0.150116
7916747	NM_002227	JAK1	Janus kinase 1	1p32.3-p31.3	8.08449	8.02097	8.01842	8.11532	1	0.833011
7916777	NR_029516	MIR101-1	microRNA 101-1	1p31.3	1.29895	1.58863	1.66592	1.54537	1.11	0.453157
7916785	NM_005478	INSL5	insulin-like 5	1p31.1-p22.3	1.54679	1.58236	1.73795	1.69876	1.1	0.028975
7916789	NM_024763	WDR78	WD repeat domain 78	1p31.3	2.76778	3.29377	3.65343	3.1657	1.12	0.40218
7916808	NM_015139	SLC35D1	solute carrier family 35 (UDP-glucuronic acid/UDP-N-acetylgalactosamine dual transporter), member D1	1p32-p31	5.14979	5.03343	5.31496	5.20671	1.03	0.167618
7916822	BC047053	C1orf141	chromosome 1 open reading frame 141	1p31.3	1.45925	1.5418	1.58278	1.41742	-1	0.996871
7916836	NM_001018067	SERBP1	SERPINE1 mRNA binding protein 1	1p31	7.01377	7.05652	7.11321	7.04674	1.01	0.39101
7916843	NM_018841	GNG12	guanine nucleotide binding protein (G protein), gamma 12	1p31.3	7.72825	7.74425	7.59832	7.57815	-1.02	0.008936
7916853	NM_004675	DIRAS3	DIRAS family, GTP-binding RAS-like 3	1p31	4.37755	4.35482	4.17565	4.34759	-1.02	0.435543
7916862	NM_024911	WLS	wntless homolog (Drosophila)	1p31.3	8.52272	8.50571	8.70538	8.65392	1.02	0.073659
7916882	NM_000329	RPE65	retinal pigment epithelium-specific protein 65kDa	1p31	2.47755	2.83465	3.20916	2.51109	1.08	0.669563
7916898	NM_001114120	DEPDC1	DEP domain containing 1	1p31.2	6.70228	6.58699	6.52991	6.34733	-1.03	0.219479
7916910	NM_017768	LRRC40	leucine rich repeat containing 40	1p31.1	5.37603	5.51517	5.97896	5.67002	1.07	0.207848
7916928	NM_030816	ANKRD13C	ankyrin repeat domain 13C	1p32.3-p31.3	6.29899	6.20153	6.38322	6.4422	1.03	0.129289
7916944	NR_028294	PTGER3	prostaglandin E receptor 3 (subtype EP3)	1p31.2	2.51848	2.5091	2.29188	2.31187	-1.09	0.010964
7916969	NM_005455	ZRANB2	zinc finger, RAN-binding domain containing 2	1p31	7.2157	7.1441	7.0029	7.01064	-1.02	0.126332
7916984	NR_029707	MIR186	microRNA 186	1p31.1	1.98649	1.30705	1.57654	1.98792	1.08	0.771525
7916986	NM_173808	NEGR1	neuronal growth regulator 1	1p31.1	2.73007	2.73235	2.60543	2.58546	-1.05	0.044182
7917004	NM_001105659	LRRIQ3	leucine-rich repeats and IQ motif containing 3	1p31.1	1.05742	1.00664	1.44055	1.37105	1.36	0.016916
7917008	NM_001105659	LRRIQ3	leucine-rich repeats and IQ motif containing 3	1p31.1	1.49162	1.55428	1.74949	1.65547	1.12	0.102935
7917015	ENST00000416014	LRRC53	leucine rich repeat containing 53	1p31.3	2.18249	2.41653	2.50235	2.44219	1.08	0.368091
7917019	NM_001002912	C1orf173	chromosome 1 open reading frame 173	1p31.1	1.88718	1.81837	1.84575	1.93037	1.02	0.586354
7917037	NM_001130042	CRYZ	crystallin, zeta (quinone reductase)	1p31-p22	7.08872	7.26279	7.42252	7.3704	1.03	0.217233
7917052	NM_152697	SLC44A5	solute carrier family 44, member 5	1p31.1	4.03742	4.09119	4.42232	4.21312	1.06	0.232589
7917082	NM_080868	ASB17	ankyrin repeat and SOCS box-containing 17	1p31.1	1.54917	1.46931	1.35857	1.38343	-1.1	0.154029
7917088	NM_005482	PIGK	phosphatidylinositol glycan anchor biosynthesis, class K	1p31.1	5.00131	4.89429	5.17467	5.2448	1.05	0.06991
7917103	NM_015534	ZZZ3	zinc finger, ZZ-type containing 3	1p31.1	6.92499	6.98596	6.89465	6.93512	-1.01	0.397333
7917120	NM_015017	USP33	ubiquitin specific peptidase 33	1p31.1	6.78445	6.84092	6.80816	6.63938	-1.01	0.474974
7917148	NM_022831	AIDA	axin interactor, dorsalization associated	1q41	7.2331	7.39293	7.27846	7.2495	-1.01	0.649073
7917151	ENST00000334785	NEXN	nexilin (F actin binding protein)	1p31.1	3.77774	3.74576	3.64422	3.9212	1.01	0.904508
7917156	NM_003902	FUBP1	far upstream element (FUSE) binding protein 1	1p31.1	7.81596	7.93817	7.93919	7.87463	1	0.719241
7917182	NM_022159	ELTD1	EGF, latrophilin and seven transmembrane domain containing 1	1p33-p32	1.44545	1.44824	1.4235	1.46561	-1	0.930983
7917199	NM_024686	TTLL7	tubulin tyrosine ligase-like family, member 7	1p31.1	5.61349	5.63381	5.58954	5.5608	-1.01	0.123635
7917232	NM_005274	GNG5	guanine nucleotide binding protein (G protein), gamma 5	1p22	8.54848	8.53534	8.38686	8.51236	-1.01	0.37802
7917240	NM_004388	CTBS	chitobiase, di-N-acetyl-	1p22	6.65863	6.58984	6.27397	6.48461	-1.04	0.23436
7917251	NR_027379	C1orf180	chromosome 1 open reading frame 180	1p22.3	2.24706	2.20334	2.0187	2.32035	-1.03	0.775083
7917255	NM_014021	SSX2IP	synovial sarcoma, X breakpoint 2 interacting protein	1p22.3	6.27205	6.35331	6.51619	6.23539	1.01	0.732098
7917276	NM_012152	LPAR3	lysophosphatidic acid receptor 3	1p22.3	8.37419	8.04907	7.80882	8.10221	-1.03	0.363741
7917283	NM_153259	MCOLN2	mucolipin 2	1p22	5.60349	5.47836	5.47215	5.50704	-1.01	0.559392
7917304	NM_018298	MCOLN3	mucolipin 3	1p22.3	5.35676	5.36595	5.68378	5.65877	1.06	0.012754
7917322	NM_032184	SYDE2	synapse defective 1, Rho GTPase, homolog 2 (C. elegans)	1p22.3	4.90923	4.49412	4.35944	4.60247	-1.05	0.474845
7917331	NR_024113	C1orf52	chromosome 1 open reading frame 52	1p22.3	5.52593	5.52944	5.82256	6.03784	1.07	0.16627
7917338	NM_003921	BCL10	B-cell CLL/lymphoma 10	1p22	6.39414	6.59369	6.67242	6.54469	1.02	0.450184
7917347	NM_012137	DDAH1	dimethylarginine dimethylaminohydrolase 1	1p22	6.73968	6.76016	7.22484	7.26279	1.07	0.006231
7917359	NM_017953	ZNHIT6	zinc finger, HIT type 6	1p22.3	6.13311	6.08923	6.2436	6.03522	1	0.832164
7917370	NM_152890	COL24A1	collagen, type XXIV, alpha 1	1p22.3	2.87472	3.11034	3.01244	2.90306	-1.01	0.822729
7917433	NM_020729	ODF2L	outer dense fiber of sperm tails 2-like	1p22.3	4.52868	4.48614	4.47499	4.44052	-1.01	0.216751
7917455	NM_004261	2011-09-15	15 kDa selenoprotein	1p31	8.73825	8.77275	8.96503	8.94949	1.02	0.02664
7917466	NR_026988	LOC339524	hypothetical LOC339524	1p22.3	3.49784	3.64536	3.69847	3.42576	-1	0.958187
7917472	NM_001514	GTF2B	general transcription factor IIB	1p22-p21	7.80228	7.7823	7.85253	7.89817	1.01	0.129422
7917482	NM_001008661	CCBL2	cysteine conjugate-beta lyase 2	1p22.2	5.95592	5.9609	5.42073	5.56245	-1.09	0.095551
7917503	NM_018284	GBP3	guanylate binding protein 3	1p22.2	2.14449	1.99266	1.89083	1.88884	-1.09	0.255644
7917516	NM_002053	GBP1	guanylate binding protein 1, interferon-inducible, 67kDa	1p22.2	2.82654	3.18185	2.76344	2.65327	-1.11	0.327266
7917532	NM_004120	GBP2	guanylate binding protein 2, interferon-inducible	1p22.2	2.67857	2.38136	1.95517	2.28954	-1.19	0.211728
7917548	NM_207398	GBP7	guanylate binding protein 7	1p22.2	2.62171	2.78674	2.94361	2.83721	1.07	0.219489
7917561	NM_052941	GBP4	guanylate binding protein 4	1p22.2	2.04731	2.17243	2.28644	2.0583	1.03	0.689973
7917576	NM_052942	GBP5	guanylate binding protein 5	1p22.2	2.17983	2.48044	2.38656	2.24548	-1.01	0.942637
7917593	NR_002830	GEMIN8P4	gem (nuclear organelle) associated protein 8 pseudogene 4	1p22	3.991	3.96419	4.05583	4.0908	1.02	0.055122
7917599	NM_020063	BARHL2	BarH-like homeobox 2	1p22.2	5.23599	5.04784	5.32843	5.39403	1.04	0.231232
7917604	NM_201269	ZNF644	zinc finger protein 644	1p22.2	6.04199	6.15733	6.4197	6.25132	1.04	0.163281
7917612	NM_001017975	HFM1	HFM1, ATP-dependent DNA helicase homolog (S. cerevisiae)	1p22.2	1.29823	1.39267	1.43669	1.41741	1.06	0.325186
7917634	NM_001017975	HFM1	HFM1, ATP-dependent DNA helicase homolog (S. cerevisiae)	1p22.2	1.70886	1.76088	1.68619	1.56052	-1.07	0.299798
7917645	NR_003287	RN28S1	RNA, 28S ribosomal 1	22p12	12.9455	12.9553	12.8595	12.7978	-1.01	0.150571
7917649	NM_003243	TGFBR3	transforming growth factor, beta receptor III	1p33-p32	5.91578	5.72878	5.4541	5.71342	-1.04	0.285839
7917674	NM_001122821	SET	SET nuclear oncogene	9q34	6.45009	6.62096	6.57511	6.44301	-1	0.830534
7917676	NM_053274	GLMN	glomulin, FKBP associated protein	1p22.1	4.30358	4.39407	4.76541	4.57235	1.07	0.141938
7917697	NM_005263	GFI1	growth factor independent 1 transcription repressor	1p22	4.92483	4.87575	4.91491	5.02038	1.01	0.405919
7917707	NM_005665	EVI5	ecotropic viral integration site 5	1p22.1	5.93179	5.81109	5.85279	5.82202	-1.01	0.672936
7917728	NM_001006605	FAM69A	family with sequence similarity 69, member A	1p22.1	4.9044	4.82265	4.85177	4.99054	1.01	0.563147
7917741	NM_016040	TMED5	transmembrane emp24 protein transport domain containing 5	1pter-q31.3	6.76945	6.90292	6.82974	6.66392	-1.01	0.492972
7917754	NM_003567	BCAR3	breast cancer anti-estrogen resistance 3	1p22.1	6.67384	6.16361	6.51808	6.72157	1.03	0.572519
7917771	NM_014597	DNTTIP2	deoxynucleotidyltransferase, terminal, interacting protein 2	1p22.1	6.20867	6.54605	6.91934	6.61096	1.06	0.232818
7917779	NM_002061	GCLM	glutamate-cysteine ligase, modifier subunit	1p22.1	6.09276	5.45386	5.78971	5.98085	1.02	0.786973
7917798	NM_000350	ABCA4	ATP-binding cassette, sub-family A (ABC1), member 4	1p22.1-p21	3.05802	3.01786	3.09928	3.16358	1.03	0.156077
7917850	NM_004815	ARHGAP29	Rho GTPase activating protein 29	1p22.1-p21.3	8.8176	8.5661	8.36386	8.58404	-1.03	0.324114
7917875	NM_001993	F3	coagulation factor III (thromboplastin, tissue factor)	1p22-p21	5.77817	5.8788	6.13048	6.03683	1.04	0.066025
7917885	NM_001839	CNN3	calponin 3, acidic	1p22-p21	8.61157	8.55324	8.43328	8.61618	-1.01	0.641367
7917896	NM_144988	ALG14	asparagine-linked glycosylation 14 homolog (S. cerevisiae)	1p21.3	5.84444	5.75951	5.88733	5.80856	1.01	0.510951
7917906	NM_000971	RPL7	ribosomal protein L7	8q21.11	10.0063	10.1333	10.1179	10.0989	1	0.651922
7917912	NM_000110	DPYD	dihydropyrimidine dehydrogenase	1p22	4.82825	5.09381	4.8941	4.84934	-1.02	0.622272
7917942	AK092728	FLJ35409	FLJ35409 protein	1p21.3	2.82732	2.78706	2.69842	2.87472	-1.01	0.854494
7917944	NR_029679	MIR137	microRNA 137	1p21.3	2.32943	2.57183	2.0598	2.10892	-1.18	0.191819
7917946	NM_001037317	LPPR5	lipid phosphate phosphatase-related protein type 5	1p21.3	1.87487	2.05951	2.05246	2.05787	1.04	0.51525
7917954	NM_001013660	FRRS1	ferric-chelate reductase 1	1p21.2	6.05644	5.75866	5.73397	6.02004	-1.01	0.895956
7917976	NM_194292	SASS6	spindle assembly 6 homolog (C. elegans)	1p21.2	4.89591	5.11679	5.15239	5.12936	1.03	0.435993
7917996	NM_144620	LRRC39	leucine rich repeat containing 39	1p21.2	2.6225	2.53977	2.41097	2.62777	-1.02	0.671792
7918008	NM_001918	DBT	dihydrolipoamide branched chain transacylase E2	1p31	5.79395	5.58766	5.38938	5.56996	-1.04	0.265511
7918026	NM_001439	EXTL2	exostoses (multiple)-like 2	1p21	5.46959	5.31015	5.53717	5.57301	1.03	0.274129
7918034	NM_001077394	DPH5	DPH5 homolog (S. cerevisiae)	1p21.2	6.42321	6.29055	6.66825	6.54371	1.04	0.111995
7918050	NM_002295	RPSA	ribosomal protein SA	3p22.2	9.5424	9.42675	9.4911	9.65232	1.01	0.480471
7918052	NM_058170	OLFM3	olfactomedin 3	1p22	2.13471	2.32087	2.30496	2.39129	1.05	0.401697
7918064	NM_001854	COL11A1	collagen, type XI, alpha 1	1p21	2.83041	2.90297	3.10243	2.93513	1.05	0.291068
7918134	NM_004038	AMY1A	amylase, alpha 1A (salivary)	1p21	3.83248	3.80288	3.23555	3.1099	-1.2	0.050441
7918157	NM_006113	VAV3	vav 3 guanine nucleotide exchange factor	1p13.3	1.75263	1.84175	1.84053	1.75714	1	0.980947
7918188	NM_013386	SLC25A24	solute carrier family 25 (mitochondrial carrier; phosphate carrier), member 24	1p13.3	6.18744	6.0736	6.36876	6.25806	1.03	0.147879
7918203	NM_001143989	NBPF4	neuroblastoma breakpoint family, member 4	1p13.3	4.02129	4.1665	3.88698	3.82366	-1.06	0.147304
7918223	NM_144584	C1orf59	chromosome 1 open reading frame 59	1p13.3	1.95165	2.12871	2.102	2.02272	1.01	0.848261
7918235	NM_152763	AKNAD1	AKNA domain containing 1	1p13.3	2.62728	2.31716	2.43806	2.7819	1.06	0.612756
7918255	NM_001048210	CLCC1	chloride channel CLIC-like 1	1p13.3	5.71936	5.9634	6.20824	6.02894	1.05	0.21975
7918275	NM_001142550	WDR47	WD repeat domain 47	1p13.3	6.06539	6.08211	6.11243	6.19827	1.01	0.299533
7918284	NM_005645	TAF13	TAF13 RNA polymerase II, TATA box binding protein (TBP)-associated factor, 18kDa	1p13.3	6.52906	6.45908	6.84279	6.81179	1.05	0.035935
7918294	NM_001122961	C1orf194	chromosome 1 open reading frame 194	1p13.3	3.18694	3.30069	3.03497	2.959	-1.08	0.084128
7918300	NM_032636	PSRC1	proline/serine-rich coiled-coil 1	1p13.3	6.5531	6.68052	6.47032	6.4317	-1.03	0.210969
7918313	NM_001010985	MYBPHL	myosin binding protein H-like	1p13.3	2.92509	2.87516	2.95248	2.98659	1.02	0.165032
7918323	NM_002959	SORT1	sortilin 1	1p21.3-p13.1|1p21.3-p13.1	8.12045	8.15908	8.10344	8.1766	1	0.99583
7918345	NM_002790	PSMA5	proteasome (prosome, macropain) subunit, alpha type, 5	1p13	8.09969	8.21232	8.63439	8.40563	1.04	0.147064
7918359	NM_020703	AMIGO1	adhesion molecule with Ig-like domain 1	1p13.3	5.28831	5.27615	5.52956	5.46679	1.04	0.082302
7918367	NM_005272	GNAT2	guanine nucleotide binding protein (G protein), alpha transducing activity polypeptide 2	1p13.1	3.65906	3.60544	3.4864	3.58654	-1.03	0.270168
7918379	NM_000849	GSTM3	glutathione S-transferase mu 3 (brain)	1p13.3	1.74115	2.04118	1.8056	1.71324	-1.07	0.536705
7918394	NM_139053	EPS8L3	EPS8-like 3	1p13.3	4.33751	4.33059	4.54823	4.54241	1.05	0.00055
7918416	NM_006492	ALX3	ALX homeobox 3	1p13.3	4.77068	4.75479	4.80526	4.91291	1.02	0.319384
7918426	NM_004696	SLC16A4	solute carrier family 16, member 4 (monocarboxylic acid transporter 5)	1p13.3	3.11672	2.84626	2.97136	3.15802	1.03	0.668385
7918437	NM_006402	HBXIP	hepatitis B virus x interacting protein	1p13.3	6.41251	6.61526	6.26898	6.18208	-1.05	0.176552
7918444	NM_005549	KCNA10	potassium voltage-gated channel, shaker-related subfamily, member 10	1p13.1	3.92896	4.44957	4.03782	3.82683	-1.07	0.496382
7918449	NM_004974	KCNA2	potassium voltage-gated channel, shaker-related subfamily, member 2	1p13	2.52449	2.53733	2.63526	2.70623	1.06	0.148661
7918457	NM_002232	KCNA3	potassium voltage-gated channel, shaker-related subfamily, member 3	1p13.3	2.41933	2.68994	2.58174	2.42912	-1.02	0.788291
7918467	NM_018372	C1orf103	chromosome 1 open reading frame 103	1p13.3	5.12898	5.29827	5.72536	5.09862	1.04	0.639978
7918474	NM_178454	DRAM2	DNA-damage regulated autophagy modulator 2	1p13.3	7.37497	7.09228	6.824	7.187	-1.03	0.431187
7918487	NM_024901	DENND2D	DENN/MADD domain containing 2D	1p13.3	6.45999	6.35439	6.71883	6.68636	1.05	0.089666
7918504	NM_002557	OVGP1	oviductal glycoprotein 1, 120kDa	1p13	5.41611	5.08449	4.57512	5.05702	-1.09	0.290743
7918517	NM_024102	WDR77	WD repeat domain 77	1p13.2	6.61002	7.0939	8.33328	7.48484	1.15	0.194848
7918533	NM_020683	ADORA3	adenosine A3 receptor	1p13.2	2.76888	2.95828	2.74479	2.71983	-1.05	0.394831
7918552	NM_019099	C1orf183	chromosome 1 open reading frame 183	1p13.2	4.07966	3.93017	4.18994	4.16936	1.04	0.252155
7918558	NM_004980	KCND3	potassium voltage-gated channel, Shal-related subfamily, member 3	1p13.3	3.94963	3.84074	3.64912	3.72841	-1.06	0.102729
7918569	NM_017744	ST7L	suppression of tumorigenicity 7 like	1p13.2	3.44992	3.6331	3.83786	3.60803	1.05	0.347586
7918593	NM_175744	RHOC	ras homolog gene family, member C	1p13.1	9.1044	9.09779	9.17016	9.22965	1.01	0.182419
7918606	NM_005167	PPM1J	protein phosphatase, Mg2+/Mn2+ dependent, 1J	1p13.2	6.60455	6.16435	5.61551	6.02647	-1.1	0.202804
7918620	AK093435	FLJ36116	hypothetical locus LOC388666	1p13.2	3.62223	3.95539	3.38914	3.5907	-1.09	0.289523
7918622	NM_001166496	SLC16A1	solute carrier family 16, member 1 (monocarboxylic acid transporter 1)	1p12	7.55649	7.69247	8.21161	7.99032	1.06	0.087903
7918634	NM_006608	PHTF1	putative homeodomain transcription factor 1	1p13	4.72288	4.48894	4.88674	4.84575	1.06	0.260858
7918657	NM_015967	PTPN22	protein tyrosine phosphatase, non-receptor type 22 (lymphoid)	1p13.3-p13.1	1.54861	1.68972	1.92141	1.76106	1.14	0.175177
7918681	NM_018364	RSBN1	round spermatid basic protein 1	1p13.2	6.03308	5.91216	5.40482	5.65513	-1.08	0.129025
7918694	NM_001010922	BCL2L15	BCL2-like 15	1p13.2	2.8565	2.91961	3.2265	3.01451	1.08	0.252177
7918703	NM_006594	AP4B1	adaptor-related protein complex 4, beta 1 subunit	1p13.2	5.91282	5.9179	6.38051	6.36658	1.08	0.003772
7918716	NM_205848	SYT6	synaptotagmin VI	1p13.2	3.83921	3.79736	3.77545	3.77146	-1.01	0.275627
7918725	NM_015906	TRIM33	tripartite motif-containing 33	1p13.1	6.6449	6.64716	7.07971	7.0028	1.06	0.061549
7918747	BC063894	DENND2C	DENN/MADD domain containing 2C	1p13.2	1.96822	2.34684	2.54898	2.28965	1.12	0.384969
7918749	BC063894	DENND2C	DENN/MADD domain containing 2C	1p13.2	5.43624	5.68058	5.74363	5.49569	1.01	0.758545
7918751	BC063894	DENND2C	DENN/MADD domain containing 2C	1p13.2	3.23781	2.85132	2.99472	3.10929	1	0.975812
7918753	BC063894	DENND2C	DENN/MADD domain containing 2C	1p13.2	1.46999	1.76262	2.04947	1.44443	1.08	0.747045
7918755	BC063894	DENND2C	DENN/MADD domain containing 2C	1p13.2	2.85751	2.74224	2.65067	2.73713	-1.04	0.288232
7918757	BC063894	DENND2C	DENN/MADD domain containing 2C	1p13.2	2.03406	2.1994	2.69462	2.6539	1.26	0.078894
7918759	NM_005872	BCAS2	breast carcinoma amplified sequence 2	1p21-p13.3	7.35944	7.50173	7.63112	7.44516	1.01	0.460879
7918768	NM_198459	DENND2C	DENN/MADD domain containing 2C	1p13.2	4.98769	4.90419	4.59544	4.84822	-1.05	0.306909
7918792	BC063894	DENND2C	DENN/MADD domain containing 2C	1p13.2	4.45528	4.36012	4.53663	4.53001	1.03	0.229074
7918794	NM_000036	AMPD1	adenosine monophosphate deaminase 1	1p13	1.977	1.83036	1.86963	2.10639	1.04	0.616751
7918813	NM_002524	NRAS	neuroblastoma RAS viral (v-ras) oncogene homolog	1p13.2	8.47722	8.42941	8.4091	8.47287	-1	0.788325
7918825	NM_001007553	CSDE1	cold shock domain containing E1, RNA-binding	1p22	9.60963	9.72877	9.68942	9.64469	-1	0.977568
7918847	NM_001102396	SIKE1	suppressor of IKBKE 1	1p13.2	6.18256	6.25216	5.74592	5.83244	-1.07	0.01859
7918857	NM_005725	TSPAN2	tetraspanin 2	1p13.2	2.15105	2.26582	2.18123	2.14725	-1.02	0.579629
7918869	NM_002506	NGF	nerve growth factor (beta polypeptide)	1p13.1	4.59484	4.49734	4.60779	4.77216	1.03	0.297476
7918878	NM_001232	CASQ2	calsequestrin 2 (cardiac muscle)	1p13.3-p11	2.73732	2.60325	2.60885	2.69823	-1.01	0.857047
7918891	NM_005599	NHLH2	nescient helix loop helix 2	1p12-p11	1.47491	1.48873	1.64088	1.67116	1.12	0.026822
7918902	NM_001779	CD58	CD58 molecule	1p13	5.78773	5.87255	5.96038	5.90459	1.02	0.200894
7918913	NM_001542	IGSF3	immunoglobulin superfamily, member 3	1p13	6.328	6.16304	5.91243	6.16727	-1.03	0.326601
7918925	NM_025188	TRIM45	tripartite motif-containing 45	1p13.1	4.92718	5.04934	5.05443	4.87699	-1	0.855719
7918936	NM_024626	VTCN1	V-set domain containing T cell activation inhibitor 1	1p13.1	3.64434	3.66822	2.95497	2.87041	-1.26	0.024931
7918955	NM_001135589	GDAP2	ganglioside induced differentiation associated protein 2	1p12	7.21017	7.16777	6.96016	7.14048	-1.02	0.357128
7918973	NM_206996	SPAG17	sperm associated antigen 17	1p12	1.67693	1.60749	1.61552	1.71575	1.01	0.741788
7919028	NM_152380	TBX15	T-box 15	1p11.1	2.38158	2.43095	2.32497	2.25739	-1.05	0.121708
7919038	NM_201263	WARS2	tryptophanyl tRNA synthetase 2, mitochondrial	1p13.3-p13.1	5.09335	4.99947	4.43403	4.54513	-1.12	0.017962
7919051	NM_001080470	ZNF697	zinc finger protein 697	1p12	5.48018	5.57463	5.40954	5.54416	-1.01	0.607547
7919055	NM_005518	HMGCS2	3-hydroxy-3-methylglutaryl-CoA synthase 2 (mitochondrial)	1p13-p12	3.28457	3.33958	3.09248	3.21253	-1.05	0.188147
7919067	NM_001159352	REG4	regenerating islet-derived family, member 4	1p13.1-p12	2.74966	2.7583	2.70242	2.60128	-1.04	0.290795
7919080	NM_001047980	NBPF7	neuroblastoma breakpoint family, member 7	1p12	2.85519	2.75106	2.69789	2.69063	-1.04	0.282719
7919088	NM_021794	ADAM30	ADAM metallopeptidase domain 30	1p13-p11	2.2518	2.33551	2.22491	2.22912	-1.03	0.35646
7919095	NM_024408	NOTCH2	Notch homolog 2 (Drosophila)	1p13-p11	7.57644	7.37005	7.42292	7.65546	1.01	0.713194
7919133	NM_001017986	FCGR1B	Fc fragment of IgG, high affinity Ib, receptor (CD64)	1p11.2	1.9138	2.04965	2.14632	2.29193	1.12	0.140518
7919139	AK090412	LOC375010	ankyrin repeat domain 20 family, member A pseudogene	1q21.1	1.60069	1.97796	1.68472	1.5377	-1.11	0.511672
7919146	NR_003366	ANKRD20B	ankyrin repeat domain 20B	2q11.1	1.72451	2.12479	1.73703	1.64323	-1.14	0.443226
7919157	NM_001123068	PPIAL4G	peptidylprolyl isomerase A (cyclophilin A)-like 4G	1q21.1	4.48161	4.52205	4.6477	4.55013	1.02	0.266233
7919162	NM_178230	PPIAL4A	peptidylprolyl isomerase A (cyclophilin A)-like 4A	1q21.2	3.11822	3.20783	3.16708	3.07391	-1.01	0.578274
7919168	NM_022359	PDE4DIP	phosphodiesterase 4D interacting protein	1q12	5.51899	5.35724	5.16526	5.39563	-1.03	0.390275
7919193	NR_002212	NUDT4P1	nudix (nucleoside diphosphate linked moiety X)-type motif 4 pseudogene 1	1q21.1	8.13255	8.24623	8.40903	8.26599	1.02	0.252601
7919197	NM_032305	POLR3GL	polymerase (RNA) III (DNA directed) polypeptide G (32kD)-like	1q21.1	4.69464	4.43221	4.15166	4.41568	-1.07	0.271711
7919208	NR_002328	GNRHR2	gonadotropin-releasing hormone (type 2) receptor 2	1q12	4.47205	4.66263	4.60576	4.34151	-1.02	0.628226
7919217	NM_001012758	NUDT17	nudix (nucleoside diphosphate linked moiety X)-type motif 17	1q21.1	4.58578	4.61839	4.66291	4.64274	1.01	0.141962
7919226	NM_006468	POLR3C	polymerase (RNA) III (DNA directed) polypeptide C (62kD)	1q21.1	5.37661	5.72072	6.79291	6.16407	1.17	0.156876
7919243	NM_007053	CD160	CD160 molecule	1q21.1	2.59183	2.58321	2.12926	2.14715	-1.21	0.003026
7919251	NM_016334	GPR89B	G protein-coupled receptor 89B	1q21.1	6.17398	6.0937	5.86692	6.00288	-1.03	0.156273
7919269	NR_004430	RNU1-1	RNA, U1 small nuclear 1	1p36.1	10.3976	10.5158	10.0735	10.3394	-1.02	0.28001
7919271	NM_173638	NBPF15	neuroblastoma breakpoint family, member 15	1q21.2	8.41978	8.23627	8.07699	8.22388	-1.02	0.275575
7919299	AK128227	LOC100130236	hypothetical LOC100130236	1q21.1	4.55414	5.04438	4.97007	4.44343	-1.02	0.821201
7919301	AK128227	LOC100130236	hypothetical LOC100130236	1q21.1	5.91048	5.9696	5.97789	5.9633	1.01	0.484018
7919305	NM_005399	PRKAB2	protein kinase, AMP-activated, beta 2 non-catalytic subunit	1q21.1	6.30611	6.35957	6.33807	6.60487	1.02	0.483811
7919314	NM_001461	FMO5	flavin containing monooxygenase 5	1q21.1	2.18352	2.13507	2.00236	2.03554	-1.07	0.051943
7919326	NM_016361	ACP6	acid phosphatase 6, lysophosphatidic	1q21	5.74248	5.66409	5.79699	5.75976	1.01	0.272678
7919340	NM_005266	GJA5	gap junction protein, alpha 5, 40kDa	1q21.1	2.16387	2.61154	2.6953	2.39189	1.07	0.629386
7919349	NR_004430	RNU1-1	RNA, U1 small nuclear 1	1p36.1	10.3976	10.5158	10.0735	10.3394	-1.02	0.28001
7919351	NM_173638	NBPF15	neuroblastoma breakpoint family, member 15	1q21.2	8.42146	8.24153	8.079	8.22052	-1.02	0.259944
7919380	AK128227	LOC100130236	hypothetical LOC100130236	1q21.1	4.55414	5.04438	4.97007	4.44343	-1.02	0.821201
7919394	NR_024510	LOC728855	hypothetical LOC728855	1q21.1	4.05308	3.91752	4.09213	4.25175	1.05	0.219901
7919407	NM_178230	PPIAL4A	peptidylprolyl isomerase A (cyclophilin A)-like 4A	1q21.2	3.2506	3.40053	3.30784	3.18441	-1.02	0.501984
7919412	NM_001170755	NBPF15	neuroblastoma breakpoint family, member 15	1q21.2	8.86971	8.68616	8.56114	8.67207	-1.02	0.296241
7919436	NM_178230	PPIAL4A	peptidylprolyl isomerase A (cyclophilin A)-like 4A	1q21.2	11.6573	11.7031	11.849	11.758	1.01	0.179483
7919438	NM_001102663	NBPF16	neuroblastoma breakpoint family, member 16	1q21.2	8.851	8.64796	8.51785	8.64082	-1.02	0.312241
7919576	NR_004430	RNU1-1	RNA, U1 small nuclear 1	1p36.1	10.3289	10.3935	10.0197	10.2969	-1.02	0.372363
7919580	AK125737 // AK125737	LOC440570 // LOC440570	hypothetical LOC440570 // hypothetical LOC440570	1p36.13 // 1p36.13	3.86302	4.12736	4.05851	3.65782	-1.04	0.633318
7919582	XR_039086	LOC100133075	hypothetical LOC100133075	1q21.2	5.30967	5.4407	5.43092	5.32136	1	0.99211
7919584	NM_001024599	HIST2H2BF	histone cluster 2, H2bf	1q21.2	2.98003	3.26241	2.77904	2.8328	-1.11	0.258702
7919589	NM_001123375	HIST2H3D	histone cluster 2, H3d	1q21.2	8.75026	8.8924	9.25542	8.9782	1.03	0.239559
7919591	AB096683	FAM72D	family with sequence similarity 72, member D	1q21.1	7.20481	6.95921	6.45781	6.65541	-1.08	0.084387
7919596	AK125737 // AK125737	LOC440570 // LOC440570	hypothetical LOC440570 // hypothetical LOC440570	1p36.13 // 1p36.13	3.86302	4.12736	4.05851	3.65782	-1.04	0.633318
7919604	AK092418	HIST2H2BF	histone cluster 2, H2bf	1q21.2	3.03444	3.63494	3.60174	3.29812	1.03	0.774287
7919606	NM_001024599	HIST2H2BF	histone cluster 2, H2bf	1q21.2	4.17879	4.48218	4.17731	4.2785	-1.02	0.620489
7919612	NM_001123375	HIST2H3D	histone cluster 2, H3d	1q21.2	8.71917	8.84503	9.31672	8.87136	1.04	0.382875
7919614	NM_001005464	HIST2H3A	histone cluster 2, H3a	1q21.2	7.43192	7.73794	7.96682	7.75975	1.04	0.28699
7919619	NM_003516	HIST2H2AA3	histone cluster 2, H2aa3	1q21.2	7.88137	8.15276	8.81509	8.54994	1.08	0.072595
7919625	NM_003528	HIST2H2BE	histone cluster 2, H2be	1q21-q23	9.14574	9.2121	9.2801	9.29461	1.01	0.175545
7919627	NM_003548	HIST2H4A	histone cluster 2, H4a	1q21	5.17522	5.56197	5.8648	5.60079	1.07	0.275771
7919637	NM_003528	HIST2H2BE	histone cluster 2, H2be	1q21-q23	6.12766	6.68211	6.56199	6.66509	1.03	0.587851
7919642	NM_175065	HIST2H2AB	histone cluster 2, H2ab	1q21	8.24048	8.82726	8.72405	7.86901	-1.03	0.697094
7919645	NM_014849	SV2A	synaptic vesicle glycoprotein 2A	1q21.2	3.10227	3.26143	3.19629	3.22331	1.01	0.785327
7919659	NM_005850	SF3B4	splicing factor 3b, subunit 4, 49kDa	1q12-q21	7.10299	7.21324	7.6258	7.50748	1.06	0.037394
7919669	NM_001145862	MTMR11	myotubularin related protein 11	1q12-q21	5.77544	5.64664	5.30595	5.53476	-1.05	0.190403
7919699	NM_020205	OTUD7B	OTU domain containing 7B	1q21.2	6.25361	5.82942	5.86299	6.19453	-1	0.966737
7919715	NM_030920	ANP32E	acidic (leucine-rich) nuclear phosphoprotein 32 family, member E	1q21.2	5.96789	6.0969	6.34306	6.15145	1.04	0.221482
7919729	NM_016022	APH1A	anterior pharynx defective 1 homolog A (C. elegans)	1p36.13-q31.3	6.97835	6.8875	7.53081	7.39137	1.08	0.034263
7919743	NM_019032	ADAMTSL4	ADAMTS-like 4	1q21.3	3.84611	3.54248	3.65173	4.03937	1.04	0.60467
7919751	NM_021960	MCL1	myeloid cell leukemia sequence 1 (BCL2-related)	1q21	8.21825	8.17447	8.40125	8.44379	1.03	0.01777
7919763	NM_207042	ENSA	endosulfine alpha	1q21.3	5.53001	5.56062	5.50751	5.44893	-1.01	0.21936
7919780	NM_018178	GOLPH3L	golgi phosphoprotein 3-like	1q21.3	6.58487	6.86718	6.71183	6.7102	-1	0.93258
7919787	NM_032132	HORMAD1	HORMA domain containing 1	1q21.3	1.74731	1.79071	1.4132	1.38248	-1.27	0.007619
7919800	NM_004079	CTSS	cathepsin S	1q21	2.77859	2.80922	2.64197	2.61747	-1.06	0.016048
7919815	NM_000396	CTSK	cathepsin K	1q21	5.07308	4.83251	4.0605	4.48536	-1.16	0.13955
7919825	NM_001668	ARNT	aryl hydrocarbon receptor nuclear translocator	1q21	7.85512	7.89818	7.86976	7.95166	1	0.558654
7919856	NM_181746	LASS2	LAG1 homolog, ceramide synthase 2	1q21.3	8.81427	8.91577	9.27569	9.04222	1.03	0.203148
7919872	NM_018379	FAM63A	family with sequence similarity 63, member A	1q21.3	3.11521	2.97644	3.08297	3.41802	1.07	0.422226
7919888	NM_001038707	CDC42SE1	CDC42 small effector 1	1q21.3	6.5856	6.90094	7.3327	6.99177	1.06	0.213713
7919898	NM_001178061	SEMA6C	sema domain, transmembrane domain (TM), and cytoplasmic domain, (semaphorin) 6C	1q21.2	5.48059	5.29022	5.06955	5.3229	-1.04	0.362874
7919923	NM_212551	LYSMD1	LysM, putative peptidoglycan-binding, domain containing 1	1q21.3	4.89924	4.92527	4.71772	4.85163	-1.03	0.298941
7919929	NM_013353	TMOD4	tropomodulin 4 (muscle)	1q12	3.03164	2.81751	3.04776	3.11052	1.05	0.372627
7919940	NM_005997	VPS72	vacuolar protein sorting 72 homolog (S. cerevisiae)	1q21	8.50154	8.46839	8.36561	8.44052	-1.01	0.237886
7919950	NM_002651	PI4KB	phosphatidylinositol 4-kinase, catalytic, beta	1q21	7.1929	7.12664	6.90162	7.05668	-1.03	0.222897
7919971	NM_000449	RFX5	regulatory factor X, 5 (influences HLA class II expression)	1q21	6.63176	6.79184	6.82921	6.52446	-1.01	0.862948
7919984	NM_003944	SELENBP1	selenium binding protein 1	1q21-q22	4.44894	4.38926	4.29908	4.36949	-1.02	0.210858
7920000	NM_015100	POGZ	pogo transposable element with ZNF domain	1q21.3	7.47666	7.34955	7.11156	7.3094	-1.03	0.247974
7920027	NM_007185	CELF3	CUGBP, Elav-like family member 3	1q21	4.86638	4.8819	5.00584	4.98073	1.02	0.024847
7920047	NM_031420	MRPL9	mitochondrial ribosomal protein L9	1q21	6.81978	7.08012	7.41793	7.16874	1.05	0.197203
7920057	NM_001083965	TDRKH	tudor and KH domain containing	1q21	5.54649	5.6199	5.39465	5.47882	-1.03	0.12205
7920077	NM_001004432	LINGO4	leucine rich repeat and Ig domain containing 4	1q21.3	4.37315	4.52589	4.63111	4.5341	1.03	0.299785
7920082	NM_005060	RORC	RAR-related orphan receptor C	1q21	4.83751	4.8598	4.91824	4.83226	1.01	0.646674
7920100	NM_182578	THEM5	thioesterase superfamily member 5	1q21.3	2.92465	3.05314	3.04344	2.93695	1	0.989025
7920114	NM_053055	THEM4	thioesterase superfamily member 4	1q21	5.85391	5.65535	5.94817	5.96465	1.04	0.289299
7920123	NM_002966	S100A10	S100 calcium binding protein A10	1q21	10.5122	10.5006	10.5002	10.4846	-1	0.296892
7920128	NM_005620	S100A11	S100 calcium binding protein A11	1q21	9.21225	9.23563	9.6996	9.65211	1.05	0.011796
7920135	NM_001008536	TCHHL1	trichohyalin-like 1	1q21.3	2.77267	2.59003	2.71003	2.90174	1.05	0.446387
7920141	NM_007113	TCHH	trichohyalin	1q21.3	4.11299	4.18983	4.06361	4.13005	-1.01	0.396941
7920146	NM_001122965	RPTN	repetin	1q21.3	2.18218	2.21263	2.33562	2.15911	1.02	0.671775
7920155	NM_001009931	HRNR	hornerin	1q21.3	2.30064	2.22601	2.00672	2.26758	-1.06	0.504932
7920165	NM_002016	FLG	filaggrin	1q21.3	3.79246	4.08163	4.4271	4.26676	1.1	0.165425
7920175	NM_001014342	FLG2	filaggrin family member 2	1q21.3	2.81055	2.96238	2.92565	2.87931	1.01	0.869109
7920178	NM_016190	CRNN	cornulin	1q21	3.71881	3.81086	3.56013	3.53356	-1.06	0.110945
7920182	NM_178435	LCE3E	late cornified envelope 3E	1q21.3	4.62611	4.38933	4.21384	4.3481	-1.05	0.268919
7920185	NM_032563	LCE3D	late cornified envelope 3D	1q21	3.72791	3.88596	3.72242	3.65934	-1.03	0.360582
7920191	NM_178431	LCE3A	late cornified envelope 3A	1q21.3	5.23968	5.49062	5.55464	5.39636	1.02	0.546621
7920193	NM_178351	LCE1C	late cornified envelope 1C	1q21.3	3.80885	3.84564	4.24529	4.41846	1.13	0.096218
7920196	NM_006945	SPRR2D	small proline-rich protein 2D	1q21-q22	1.93538	1.82052	1.68299	1.80506	-1.08	0.251592
7920201	NM_001017418	SPRR2B	small proline-rich protein 2B	1q21-q22	1.90102	2.01753	2.20427	2.11536	1.1	0.119947
7920205	NM_005988	SPRR2A	small proline-rich protein 2A	1q21-q22	2.43864	2.46557	2.89111	2.56456	1.11	0.338825
7920210	NM_001017418	SPRR2B	small proline-rich protein 2B	1q21-q22	1.93095	2.22088	2.0813	1.89049	-1.05	0.662589
7920214	NM_001024209	SPRR2E	small proline-rich protein 2E	1q21-q22	1.56779	1.65515	1.70632	1.54758	1.01	0.883868
7920217	NM_001014291	SPRR2G	small proline-rich protein 2G	1q21-q22	4.73032	4.62185	4.55431	4.89637	1.01	0.823381
7920220	NM_052891	PGLYRP3	peptidoglycan recognition protein 3	1q21	3.08634	2.94848	2.90704	3.08062	-1.01	0.852089
7920228	NM_020393	PGLYRP4	peptidoglycan recognition protein 4	1q21	3.34807	3.31802	3.431	3.47062	1.04	0.047809
7920238	NM_005621	S100A12	S100 calcium binding protein A12	1q21	2.30673	2.26873	2.36669	2.64342	1.09	0.357117
7920244	NM_002964	S100A8	S100 calcium binding protein A8	1q21	1.90373	2.04393	1.8386	1.8529	-1.07	0.316331
7920249	NM_001045479	S100A7L2	S100 calcium binding protein A7-like 2	1q21.3	2.02366	1.94653	1.81333	1.96184	-1.05	0.396071
7920252	NM_002963	S100A7	S100 calcium binding protein A7	1q21	4.33395	4.31536	3.95221	3.86822	-1.11	0.053885
7920258	NM_014624	S100A6	S100 calcium binding protein A6	1q21	7.06718	6.95401	7.10554	7.1255	1.01	0.307707
7920264	NM_002962	S100A5	S100 calcium binding protein A5	1q21	4.02431	3.95954	4.3086	3.97473	1.04	0.531928
7920271	NM_019554	S100A4	S100 calcium binding protein A4	1q21	7.83757	7.97154	7.92835	7.58174	-1.02	0.542336
7920278	NM_002960	S100A3	S100 calcium binding protein A3	1q21	4.42564	4.65548	5.46483	5.02751	1.16	0.141259
7920285	NM_005978	S100A2	S100 calcium binding protein A2	1q21	4.35735	4.23774	4.40894	4.52147	1.04	0.178392
7920291	NM_080388	S100A16	S100 calcium binding protein A16	1q21	8.50301	8.54266	8.64325	8.55343	1.01	0.314718
7920297	NM_020672	S100A14	S100 calcium binding protein A14	1q21.3	7.57395	7.56329	7.12833	7.29577	-1.05	0.145565
7920303	NM_005979	S100A13	S100 calcium binding protein A13	1q21	4.79643	4.74143	4.6901	4.63476	-1.02	0.112073
7920317	NM_004515	ILF2	interleukin enhancer binding factor 2, 45kDa	1q21.3	10.1769	10.1724	10.2344	10.3407	1.01	0.279459
7920337	NM_023015	INTS3	integrator complex subunit 3	1q21.3	4.59922	4.37517	4.48705	4.36245	-1.01	0.685671
7920341	NM_020699	GATAD2B	GATA zinc finger domain containing 2B	1q21.3	7.57907	7.74016	7.62071	7.57911	-1.01	0.591918
7920354	NM_014856	DENND4B	DENN/MADD domain containing 4B	1q21	6.58408	6.57782	6.49137	6.57849	-1.01	0.481939
7920382	NM_181715	CRTC2	CREB regulated transcription coactivator 2	1q21.3	6.78408	6.78614	6.8326	7.01082	1.02	0.367934
7920401	NM_014437	SLC39A1	solute carrier family 39 (zinc transporter), member 1	1q21	6.59788	6.66171	6.90292	6.83151	1.04	0.039335
7920409	NM_006694	JTB	jumping translocation breakpoint	1q21	8.27134	8.23395	8.29079	8.21565	1	0.990668
7920422	NM_002870	RAB13	RAB13, member RAS oncogene family	1q21.2	7.0623	7.27676	7.28376	7.15172	1.01	0.745114
7920426	NM_207308	NUP210L	nucleoporin 210kDa-like	1q21.3	2.23104	2.38105	2.27788	2.21412	-1.03	0.567923
7920472	NM_152263	TPM3	tropomyosin 3	1q21.2	3.61113	3.70689	3.68822	3.6527	1	0.853237
7920487	BC127710	C1orf189	chromosome 1 open reading frame 189	1q21.3	3.49836	3.35198	3.76472	3.62032	1.08	0.121527
7920492	NM_001098616	C1orf43	chromosome 1 open reading frame 43	1q21.2	8.91017	9.02749	9.06089	9.00249	1.01	0.468435
7920506	NM_001010846	SHE	Src homology 2 domain containing E	1q21.3	3.47649	3.77425	3.54517	3.67335	-1	0.933457
7920515	NM_017582	UBE2Q1	ubiquitin-conjugating enzyme E2Q family member 1	1q21.3	7.66766	7.75153	7.8232	7.74955	1.01	0.304611
7920531	NM_001111	ADAR	adenosine deaminase, RNA-specific	1q21.1-q21.2	7.96087	7.94541	7.99469	8.04804	1.01	0.216449
7920552	NM_002249	KCNN3	potassium intermediate/small conductance calcium-activated channel, subfamily N, member 3	1q21.3	4.87187	4.73394	4.77458	4.81401	-1	0.921809
7920567	NM_006556	PMVK	phosphomevalonate kinase	1q22	4.97561	5.01158	5.10221	5.05081	1.02	0.132439
7920575	NM_020524	PBXIP1	pre-B-cell leukemia homeobox interacting protein 1	1q21.3	5.81433	5.61947	5.57415	5.7577	-1.01	0.740109
7920594	NM_138300	PYGO2	pygopus homolog 2 (Drosophila)	1q21.3	6.2457	6.34811	6.19457	6.05328	-1.03	0.19806
7920600	NM_183001	SHC1	SHC (Src homology 2 domain containing) transforming protein 1	1q21	8.82582	8.64192	8.69639	8.90585	1.01	0.677776
7920616	NM_144622	DCST2	DC-STAMP domain containing 2	1q21.3-q22	3.90291	4.29448	3.9702	3.90505	-1.04	0.560157
7920633	NM_018973	DPM3	dolichyl-phosphate mannosyltransferase polypeptide 3	1q22	7.23357	7.09326	6.78029	6.94775	-1.04	0.114994
7920642	NM_001018016	MUC1	mucin 1, cell surface associated	1q21	4.58652	4.67213	5.00921	4.86597	1.07	0.089071
7920659	NM_173852	KRTCAP2	keratinocyte associated protein 2	1q22	6.9804	7.01566	7.08988	7.06197	1.01	0.079767
7920664	NM_007112	THBS3	thrombospondin 3	1q21	4.68374	4.15276	4.03208	4.39518	-1.05	0.597081
7920687	NR_002188	GBAP1	glucosidase, beta, acid pseudogene 1	1q21	4.06609	4.53426	4.39236	4.37714	1.02	0.77929
7920697	NM_000157	GBA	glucosidase, beta, acid	1q21	5.67203	6.2352	6.92862	6.31204	1.11	0.252382
7920707	NM_006589	FAM189B	family with sequence similarity 189, member B	1q21	7.66444	7.799	7.96879	7.84257	1.02	0.200495
7920725	NM_005698	SCAMP3	secretory carrier membrane protein 3	1q21	7.20084	7.21954	7.54986	7.34997	1.03	0.248989
7920737	NM_003993	CLK2	CDC-like kinase 2	1q21	7.30941	7.25554	7.1334	7.36844	-1	0.833829
7920744	NM_000298	PKLR	pyruvate kinase, liver and RBC	1q21	4.6384	4.62123	4.46032	4.53413	-1.03	0.157651
7920757	NM_002004	FDPS	farnesyl diphosphate synthase (farnesyl pyrophosphate synthetase, dimethylallyltranstransferase, geranyltranstransferase)	1q22	3.85182	4.14066	4.16764	3.99594	1.02	0.671094
7920766	NM_018489	ASH1L	ash1 (absent, small, or homeotic)-like (Drosophila)	1q22	6.93051	6.92209	7.09765	6.95108	1.01	0.408009
7920799	NM_139118	YY1AP1	YY1 associated protein 1	1q22	6.83062	6.61739	6.42687	6.64556	-1.03	0.343925
7920810	NM_001037533	GON4L	gon-4-like (C. elegans)	1q22	5.59152	5.60571	5.46921	5.55065	-1.02	0.266255
7920839	NM_006912	RIT1	Ras-like without CAAX 1	1q22	5.27507	4.79696	4.02014	4.9815	-1.12	0.454717
7920852	BC062637	KIAA0907	KIAA0907	1q22	7.3015	7.03188	6.75319	7.13385	-1.03	0.448993
7920873	NR_002974	SNORA42	small nucleolar RNA, H/ACA box 42	1q22	6.02205	6.13704	5.78421	5.75998	-1.05	0.105639
7920875	NR_003005	SCARNA4	small Cajal body-specific RNA 4	1q22	2.78767	2.78057	2.77222	2.71579	-1.01	0.387368
7920877	NM_001162383	ARHGEF2	Rho/Rac guanine nucleotide exchange factor (GEF) 2	1q21-q22	6.76047	6.63815	6.74467	6.86171	1.02	0.344807
7920903	NM_003145	SSR2	signal sequence receptor, beta (translocon-associated protein beta)	1q21-q23	10.1914	10.0927	9.96882	10.1378	-1.01	0.479337
7920912	NM_020131	UBQLN4	ubiquilin 4	1q21	7.1719	7.32005	7.59583	7.41283	1.04	0.164906
7920928	NM_024897	PAQR6	progestin and adipoQ receptor family member VI	1q22	5.88138	5.95575	5.60017	5.59156	-1.06	0.069753
7920944	NM_015327	SMG5	Smg-5 homolog, nonsense mediated mRNA decay factor (C. elegans)	1q21.2	6.88732	6.97384	6.96898	6.90502	1	0.916701
7920971	NM_144580	C1orf85	chromosome 1 open reading frame 85	1q22	6.68564	6.95797	7.51353	7.24427	1.08	0.10064
7920980	NM_001004319	VHLL	von Hippel-Lindau tumor suppressor-like	1q22	2.99775	3.01694	2.87926	2.95797	-1.03	0.251119
7920984	NM_005998	CCT3	chaperonin containing TCP1, subunit 3 (gamma)	1q23	9.39048	9.41132	9.71397	9.63478	1.03	0.075082
7921003	NM_006365	C1orf61	chromosome 1 open reading frame 61	1q22	3.33082	3.4187	3.1139	3.28733	-1.05	0.256953
7921012	NR_029691	MIR9-1	microRNA 9-1	1q22	1.7555	1.9642	1.78524	1.76852	-1.05	0.571968
7921014	NM_005920	MEF2D	myocyte enhancer factor 2D	1q12-q23	7.74418	7.54323	7.33024	7.80809	-1.01	0.811701
7921033	NM_178229	IQGAP3	IQ motif containing GTPase activating protein 3	1q22-q23.1	5.24202	5.21624	5.18443	5.25975	-1	0.884205
7921076	NM_182679	GPATCH4	G patch domain containing 4	1q22	5.34977	5.49128	6.09832	5.6755	1.09	0.246596
7921088	NM_006617	NES	nestin	1q23.1	5.49014	5.2175	5.69783	5.70219	1.06	0.238735
7921099	NM_001878	CRABP2	cellular retinoic acid binding protein 2	1q21.3	9.58548	9.66567	9.51628	9.54831	-1.01	0.226112
7921110	NM_030980	ISG20L2	interferon stimulated exonuclease gene 20kDa-like 2	1q23.1	7.35294	7.33326	7.19123	7.3923	-1.01	0.699419
7921121	NM_145729	MRPL24	mitochondrial ribosomal protein L24	1q21-q22	6.6254	6.55969	6.74546	6.75008	1.02	0.131279
7921133	NM_004494	HDGF	hepatoma-derived growth factor	1q21-q23	8.68465	8.72809	8.96895	8.83089	1.02	0.193544
7921144	NM_001161441	SH2D2A	SH2 domain containing 2A	1q21	4.66903	4.64223	4.79332	4.8553	1.04	0.077497
7921155	NM_014215	INSRR	insulin receptor-related receptor	1q21-q23	3.32939	3.48751	3.61809	3.54463	1.05	0.235929
7921179	NM_198236	ARHGEF11	Rho guanine nucleotide exchange factor (GEF) 11	1q21	5.75202	5.61503	5.92989	5.89845	1.04	0.169007
7921222	NM_001004341	ETV3L	ets variant 3-like	1q23.1	3.76987	3.75121	3.90771	3.84224	1.03	0.155805
7921228	NM_001145312	ETV3	ets variant 3	1q21-q23	7.0827	7.21198	6.711	6.73714	-1.06	0.085953
7921237	NM_031281	FCRL5	Fc receptor-like 5	1q21	2.73537	3.01966	2.81074	2.81235	-1.02	0.723345
7921259	NM_031282	FCRL4	Fc receptor-like 4	1q21	2.38906	2.26966	2.36877	2.30891	1	0.904059
7921275	NM_052939	FCRL3	Fc receptor-like 3	1q21-q22	3.00197	3.18851	3.05553	3.11421	-1	0.930468
7921298	NM_030764	FCRL2	Fc receptor-like 2	1q21	2.03044	2.11785	2.02847	1.94637	-1.04	0.285451
7921319	NM_052938	FCRL1	Fc receptor-like 1	1q21-q22	4.08976	3.98132	3.9533	4.04258	-1.01	0.647662
7921332	NM_005894	CD5L	CD5 molecule-like	1q21-q23	3.36964	3.48774	3.50294	3.37517	1	0.916122
7921342	AK057458	LOC729866	hCG1994895	1q23.1	3.97249	4.30643	4.26945	4.19377	1.02	0.678781
7921344	NM_012081	ELL2	elongation factor, RNA polymerase II, 2	5q15	6.98012	7.10143	6.63375	6.74834	-1.05	0.052768
7921346	NM_001764	CD1B	CD1b molecule	1q22-q23	1.66084	1.9188	1.93558	1.68375	1.01	0.922401
7921354	NM_001004475	OR10T2	olfactory receptor, family 10, subfamily T, member 2	1q23.1	1.89216	2.15798	2.18138	2.14599	1.07	0.484731
7921356	NM_001004476	OR10K2	olfactory receptor, family 10, subfamily K, member 2	1q23.1	1.50825	1.93353	1.78869	1.46717	-1.06	0.762755
7921360	NM_001005189	OR6Y1	olfactory receptor, family 6, subfamily Y, member 1	1q23.1	3.0686	3.41961	3.59159	3.31727	1.06	0.449667
7921362	NM_001160325	OR6P1	olfactory receptor, family 6, subfamily P, member 1	1q23.1	2.29636	2.47691	2.33095	2.18914	-1.06	0.390518
7921364	NM_001004477	OR10X1	olfactory receptor, family 10, subfamily X, member 1	1q23.1	1.25572	1.5225	1.53151	1.30258	1.02	0.888631
7921367	NM_003126	SPTA1	spectrin, alpha, erythrocytic 1 (elliptocytosis 2)	1q21	2.60683	2.74026	2.5437	2.40436	-1.08	0.174762
7921420	NM_001005279	OR6K2	olfactory receptor, family 6, subfamily K, member 2	1q23.1	2.87219	3.03077	3.12258	2.54452	-1.04	0.754443
7921422	NM_001005327	OR6K3	olfactory receptor, family 6, subfamily K, member 3	1q23.1	1.20245	1.47531	1.41821	1.18418	-1.03	0.853751
7921427	NM_001005185	OR6N1	olfactory receptor, family 6, subfamily N, member 1	1q23.1	2.27443	2.25957	2.13033	1.93709	-1.11	0.248295
7921429	NM_001005278	OR6N2	olfactory receptor, family 6, subfamily N, member 2	1q23.1	2.6695	2.9433	2.85448	2.74277	-1	0.964879
7921434	NM_004833	AIM2	absent in melanoma 2	1q22	1.70986	1.70859	1.66273	1.6103	-1.04	0.220098
7921442	ENST00000389011	OR10J3	olfactory receptor, family 10, subfamily J, member 3	1q23.2	1.64319	1.71318	1.65898	1.64927	-1.01	0.615993
7921445	NM_001004467	OR10J3	olfactory receptor, family 10, subfamily J, member 3	1q23.2	3.01102	3.26522	3.30678	3.14043	1.03	0.638028
7921447	NM_001004469	OR10J5	olfactory receptor, family 10, subfamily J, member 5	1q23.2	1.449	1.65614	1.62098	1.79786	1.1	0.371024
7921449	NM_000567	CRP	C-reactive protein, pentraxin-related	1q21-q23	2.66713	2.53426	2.72601	2.64211	1.03	0.416871
7921462	NM_001013661	VSIG8	V-set and immunoglobulin domain containing 8	1q23.2	4.0325	4.06056	4.29031	4.23927	1.05	0.033323
7921473	NM_012337	CCDC19	coiled-coil domain containing 19	1q22	4.00285	4.04779	3.72436	3.85299	-1.06	0.138922
7921487	NM_003564	TAGLN2	transgelin 2	1q21-q25	7.8302	7.90346	7.58825	7.51857	-1.04	0.025195
7921492	NM_001135050	IGSF9	immunoglobulin superfamily, member 9	1q22-q23	6.48983	6.57915	6.34654	6.32435	-1.03	0.123724
7921516	NM_033438	SLAMF9	SLAM family member 9	1q23.2	2.96713	3.0041	2.92733	3.0672	1	0.895866
7921526	NM_145167	PIGM	phosphatidylinositol glycan anchor biosynthesis, class M	1q23.2	5.50582	5.83906	6.1711	5.60651	1.04	0.59045
7921533	NM_002241	KCNJ10	potassium inwardly-rectifying channel, subfamily J, member 10	1q22-q23	2.57658	2.87617	2.60042	2.48779	-1.07	0.424686
7921538	NM_052868	IGSF8	immunoglobulin superfamily, member 8	1q23.1	7.38246	7.2703	7.06887	7.26571	-1.02	0.324046
7921552	NR_028103	DCAF8	DDB1 and CUL4 associated factor 8	1q22-q23	5.83751	5.80926	6.1493	5.9475	1.04	0.263151
7921571	NM_002857	PEX19	peroxisomal biogenesis factor 19	1q23.2	6.63692	6.29097	6.12858	6.50631	-1.02	0.625419
7921583	NM_001098398	COPA	coatomer protein complex, subunit alpha	1q23-q25	9.39435	9.22204	9.14808	9.33335	-1.01	0.647346
7921625	NM_052931	SLAMF6	SLAM family member 6	1q23.2	1.87881	2.21748	2.15153	2.05514	1.03	0.800822
7921637	NM_003874	CD84	CD84 molecule	1q24	2.24754	2.21117	2.1899	2.3259	1.01	0.747893
7921652	NM_003037	SLAMF1	signaling lymphocytic activation molecule family member 1	1q22-q23	1.95319	1.95409	1.91567	1.95778	-1.01	0.569113
7921667	NM_001778	CD48	CD48 molecule	1q21.3-q22	3.25785	3.20543	3.26027	3.24358	1.01	0.577988
7921677	NM_016382	CD244	CD244 molecule, natural killer cell receptor 2B4	1q23.3	2.25005	2.43786	2.41483	2.21553	-1.01	0.853073
7921690	NM_017625	ITLN1	intelectin 1 (galactofuranose binding)	1q22-q23.5	2.25741	2.28321	2.57356	2.50854	1.12	0.047425
7921702	NM_080878	ITLN2	intelectin 2	1q22-q23	2.8631	3.02942	3.06288	3.08198	1.04	0.368415
7921713	NM_016946	F11R	F11 receptor	1q21.2-q21.3	8.61799	8.40002	8.03523	8.42089	-1.03	0.359944
7921738	NM_007122	USF1	upstream transcription factor 1	1q22-q23	7.22297	7.20945	7.1263	7.21051	-1.01	0.456506
7921752	NM_001025598	ARHGAP30	Rho GTPase activating protein 30	1q23.3	3.69815	3.78875	3.78769	3.87127	1.02	0.298274
7921773	NM_030916	PVRL4	poliovirus receptor-related 4	1q22-q23.2	4.35343	4.38506	4.36704	4.5021	1.01	0.506279
7921786	NM_012394	PFDN2	prefoldin subunit 2	1q23.3	7.41518	7.78247	7.36564	7.25721	-1.04	0.347306
7921793	NM_032998	DEDD	death effector domain containing	1q23.3	6.70151	6.7253	6.93002	6.83216	1.02	0.164369
7921806	NM_003779	B4GALT3	UDP-Gal:betaGlcNAc beta 1,4- galactosyltransferase, polypeptide 3	1q21-q23	7.43617	7.33601	7.3639	7.43873	1	0.831889
7921821	NM_005099	ADAMTS4	ADAM metallopeptidase with thrombospondin type 1 motif, 4	1q21-q23	3.73547	3.65928	3.38088	3.57378	-1.06	0.231509
7921834	NM_001643	APOA2	apolipoprotein A-II	1q21-q23	3.65377	3.59746	3.66689	3.79372	1.03	0.320316
7921840	NM_001077482	NR1I3	nuclear receptor subfamily 1, group I, member 3	1q23.3	2.47901	2.45931	2.35035	2.3982	-1.04	0.119239
7921852	NM_000530	MPZ	myelin protein zero	1q23.3	4.41833	4.04808	3.92394	4.35707	-1.02	0.776439
7921862	NM_001013625	C1orf192	chromosome 1 open reading frame 192	1q23.3	2.52843	2.55378	2.76592	2.67546	1.07	0.136131
7921868	NM_000569	FCGR3A	Fc fragment of IgG, low affinity IIIa, receptor (CD16a)	1q23	1.72658	1.89641	2.08887	1.84633	1.09	0.413084
7921873	NM_000569	FCGR3A	Fc fragment of IgG, low affinity IIIa, receptor (CD16a)	1q23	2.71406	2.82451	2.61942	2.67018	-1.05	0.228358
7921882	NM_015441	OLFML2B	olfactomedin-like 2B	1q23.3	4.79014	4.56414	4.52295	4.63369	-1.02	0.539816
7921895	NM_182581	C1orf111	chromosome 1 open reading frame 111	1q23.3	3.51039	3.8413	4.00609	3.86978	1.07	0.335335
7921900	NM_053282	SH2D1B	SH2 domain containing 1B	1q23.3	2.32909	2.32324	2.44083	2.34653	1.03	0.387382
7921909	NM_178550	C1orf110	chromosome 1 open reading frame 110	1q23.3	2.03074	2.2814	2.27088	2.01942	-1.01	0.956549
7921916	NM_003617	RGS5	regulator of G-protein signaling 5	1q23.1	3.75815	3.67535	3.36675	3.68671	-1.05	0.437682
7921936	NM_177398	LMX1A	LIM homeobox transcription factor 1, alpha	1q22-q23	3.99716	4.07285	4.08213	4.02962	1.01	0.699534
7921955	NM_006917	RXRG	retinoid X receptor, gamma	1q22-q23	2.18999	2.09081	2.10177	2.07943	-1.02	0.494274
7921970	NM_000696	ALDH9A1	aldehyde dehydrogenase 9 family, member A1	1q23.1	7.35197	7.60879	7.87443	7.55383	1.03	0.377799
7921987	NM_019026	TMCO1	transmembrane and coiled-coil domains 1	1q22-q25	7.26035	7.35584	7.31509	7.29798	-1	0.979305
7922001	NM_001017961	FAM78B	family with sequence similarity 78, member B	1q24.1	4.07771	3.89373	4.15669	4.23628	1.05	0.226613
7922008	NM_053053	TADA1	transcriptional adaptor 1	1q24.1	7.00794	6.98913	7.20143	7.1047	1.02	0.182234
7922018	NM_199351	ILDR2	immunoglobulin-like domain containing receptor 2	1q24.1	4.58571	4.35531	5.00792	5.12337	1.13	0.07556
7922029	NM_005814	GPA33	glycoprotein A33 (transmembrane)	1q24.1	4.16357	3.81221	3.9048	4.1715	1.01	0.842253
7922040	NM_198053	CD247	CD247 molecule	1q22-q23	4.38909	4.31184	4.22996	4.33553	-1.02	0.417656
7922051	NM_003851	CREG1	cellular repressor of E1A-stimulated genes 1	1q24	8.18441	8.10841	8.14698	8.24636	1.01	0.510981
7922058	NM_018417	ADCY10	adenylate cyclase 10 (soluble)	1q24	2.2466	2.31227	1.98163	2.10742	-1.11	0.116108
7922095	NR_026550	BRP44	brain protein 44	1q24	6.36785	6.39793	6.5628	6.51563	1.02	0.043444
7922104	NM_004483	GCSH	glycine cleavage system protein H (aminomethyl carrier)	16q23.2	7.21743	7.25911	7.58394	7.38189	1.03	0.238077
7922108	NM_153832	GPR161	G protein-coupled receptor 161	1q24.2	6.19742	6.13589	6.15165	6.16341	-1	0.816937
7922121	NR_026844	ANKRD36BP1	ankyrin repeat domain 36B pseudogene 1	1q24.2	2.56214	2.29666	2.42916	2.77401	1.07	0.516367
7922127	NM_003175	XCL2	chemokine (C motif) ligand 2	1q23-q25	1.88171	1.59094	2.02857	2.19732	1.22	0.184752
7922130	NM_001937	DPT	dermatopontin	1q12-q23	3.35546	3.6961	3.5116	3.21142	-1.05	0.545531
7922137	NM_013330	NME7	non-metastatic cells 7, protein expressed in (nucleoside-diphosphate kinase)	1q24	5.34867	5.42655	5.36046	5.3546	-1.01	0.580959
7922152	BC026073	C1orf114	chromosome 1 open reading frame 114	1q24	2.03232	1.94082	2.02297	2.00993	1.02	0.631194
7922162	NM_006996	SLC19A2	solute carrier family 19 (thiamine transporter), member 2	1q23.3	5.90818	5.89814	5.96759	5.99992	1.01	0.101922
7922174	NM_000130	F5	coagulation factor V (proaccelerin, labile factor)	1q23	4.07142	3.77632	3.85517	3.95616	-1	0.923175
7922200	NM_003005	SELP	selectin P (granule membrane protein 140kDa, antigen CD62)	1q22-q25	2.58741	2.62567	2.44875	2.63659	-1.03	0.61872
7922219	NM_000655	SELL	selectin L	1q23-q25	4.52606	4.48907	4.47081	4.42387	-1.01	0.18833
7922229	NM_000450	SELE	selectin E	1q22-q25	2.33631	2.38577	2.34376	2.30828	-1.02	0.379143
7922243	NM_033418	C1orf156	chromosome 1 open reading frame 156	1q24.2	4.55515	4.66878	4.67815	4.48559	-1.01	0.818045
7922250	NM_181093	SCYL3	SCY1-like 3 (S. cerevisiae)	1q24.2	5.32715	5.39304	5.5672	5.27998	1.01	0.735434
7922268	NM_014970	KIFAP3	kinesin-associated protein 3	1q24.2	6.22002	6.02099	5.65506	5.96271	-1.05	0.251446
7922301	NM_000261	MYOC	myocilin, trabecular meshwork inducible glucocorticoid response	1q23-q24	1.97381	1.89888	1.89947	1.93849	-1.01	0.731895
7922309	NM_003762	VAMP4	vesicle-associated membrane protein 4	1q24-q25	5.0184	4.86517	4.73779	4.89908	-1.03	0.38321
7922326	NR_029627	MIR214	microRNA 214	1q24.3	3.65382	3.7349	3.91506	3.8968	1.06	0.106834
7922328	NR_029618	MIR199A2	microRNA 199a-2	1q24.3	3.83916	4.02161	4.02171	4.0908	1.03	0.382208
7922330	NM_153747	PIGC	phosphatidylinositol glycan anchor biosynthesis, class C	1q23-q25	4.49619	4.10158	4.17723	4.20768	-1.03	0.685021
7922337	NM_005092	TNFSF18	tumor necrosis factor (ligand) superfamily, member 18	1q23	2.36351	2.44533	2.11594	1.88387	-1.2	0.147433
7922343	NM_003326	TNFSF4	tumor necrosis factor (ligand) superfamily, member 4	1q25	2.0215	2.3394	2.45017	2.16675	1.06	0.609494
7922351	AK130460	LOC646870	hypothetical protein LOC646870	1q25.1	3.86316	3.38743	3.58149	4.23088	1.08	0.563125
7922353	NM_178527	SLC9A11	solute carrier family 9, member 11	1q25.1	1.61934	1.81696	1.75591	1.61066	-1.02	0.804994
7922382	NM_198493	ANKRD45	ankyrin repeat domain 45	1q25.1	2.01786	1.92052	2.04224	2.15178	1.06	0.224902
7922391	NM_001127181	CENPL	centromere protein L	1q25.1	4.29001	4.33231	4.34639	4.49554	1.03	0.367068
7922402	NR_002746	SNORD47	small nucleolar RNA, C/D box 47	1q25.1	7.02371	6.90622	6.14827	6.44892	-1.11	0.106351
7922404	NR_003940	SNORD80	small nucleolar RNA, C/D box 80	1q25.1	7.17648	6.97558	5.83069	6.29731	-1.17	0.104292
7922406	NR_003939	SNORD79	small nucleolar RNA, C/D box 79	1q25.1	6.48929	6.24764	5.8944	6.21283	-1.05	0.264558
7922408	NR_003944	SNORD78	small nucleolar RNA, C/D box 78	1q25.1	7.65094	7.2142	6.82889	7.37097	-1.05	0.443971
7922410	NR_002750	SNORD44	small nucleolar RNA, C/D box 44	1q25.1	7.49929	7.4047	6.91922	7.2255	-1.05	0.221275
7922412	NR_003943	SNORD77	small nucleolar RNA, C/D box 77	1q25.1	2.75468	2.37087	2.03678	2.63833	-1.1	0.602155
7922414	NR_003942	SNORD76	small nucleolar RNA, C/D box 76	1q25.1	9.26539	9.04382	8.57668	8.80507	-1.05	0.100415
7922416	NR_003941	SNORD75	small nucleolar RNA, C/D box 75	1q25.1	6.26331	6.02571	5.8792	6.35881	-1	0.935445
7922418	NR_002579	SNORD74	small nucleolar RNA, C/D box 74	1q25.1	8.03914	8.04273	7.52593	7.94048	-1.04	0.377351
[truncated: 20,205 more rows]
